# Supplementary material
Source: Elsevier journal article supplement (https://www.sciencedirect.com/science/article/pii/S0300289622000175)
Supplement: mmc1 [file S0300289622000175:mmc1.pdf]

## ACTUALIZACIÓN 2021 DE LA GUÍA ESPAÑOLA DE LA EPOC (GesEPOC). DIAGNÓSTICO Y TRATAMIENTO DEL SÍNDROME DE AGUDIZACIÓN DE LA EPOC

### Suplemento. Preguntas PICO y evaluación de la evidencia.

|                                                                                                                                                                                                                                                                                                                                                                                                                                                                                                                                                                                                                                                                                                                                                                                                                                                                                                                                                                                                                                                                                                                                                                                                                                                                                                                                                                                                                                                                                                                                                                                                                                                             |
|-------------------------------------------------------------------------------------------------------------------------------------------------------------------------------------------------------------------------------------------------------------------------------------------------------------------------------------------------------------------------------------------------------------------------------------------------------------------------------------------------------------------------------------------------------------------------------------------------------------------------------------------------------------------------------------------------------------------------------------------------------------------------------------------------------------------------------------------------------------------------------------------------------------------------------------------------------------------------------------------------------------------------------------------------------------------------------------------------------------------------------------------------------------------------------------------------------------------------------------------------------------------------------------------------------------------------------------------------------------------------------------------------------------------------------------------------------------------------------------------------------------------------------------------------------------------------------------------------------------------------------------------------------------|
| <b>Pregunta para responder:</b><br><b>¿Se deben prescribir antibióticos en las agudizaciones de la EPOC?</b>                                                                                                                                                                                                                                                                                                                                                                                                                                                                                                                                                                                                                                                                                                                                                                                                                                                                                                                                                                                                                                                                                                                                                                                                                                                                                                                                                                                                                                                                                                                                                |
| <p>Se identificó una revisión sistemática (RS), que incluyó 19 ensayos clínicos aleatorizados (ECAs) en pacientes EPOC y que evaluaron los efectos del tratamiento con antibióticos de las agudizaciones en el entorno ambulatorio y/o hospitalario.</p> <p>Posteriormente se identificó un ECA (Vermeersch 2019) y una evaluación económica (realizada con los datos de un ECA incluido en la RS) sobre el uso de antibióticos en pacientes ambulatorios (Finch 2019).</p> <p>Para el análisis se seleccionaron los 19 ECAs incluidos en la RS con un total de 2663 pacientes (11 estudios en pacientes ambulatorios, 7 estudios en pacientes hospitalarios y 1 estudio en pacientes críticos) y un estudio posterior que incluyó 301 pacientes hospitalarios. Los estudios asignaron de forma aleatoria a los pacientes a recibir placebo (en 4 estudios el grupo control recibió prednisolona) o antibióticos (amoxicilina/ácido clavulánico, trimetropin/sulfametoxazol, amoxicilina, doxiciclina, ciprofloxacina, amoxicilina/clavulanate, cefaclor, ofloxacina, penicilina via parenteral, tetraciclina, chloramfenicol, co-trimoxazol, piperacilina-sulbactam, ceftazidima, levofloxacina, azitromicina) durante 5 a 10 días.</p> <p>El análisis se ha realizado con los estudios más recientes, excluyendo los estudios que evaluaron pautas o antibióticos actualmente en desuso.</p>                                                                                                                                                                                                                                                              |
| <b>Revisiones sistemáticas:</b> <ol style="list-style-type: none"><li>1. Vollenweider DJ, Frei A, Steurer-Stey CA, Garcia-Aymerich J, Puhan MA. Antibiotics for exacerbations of chronic obstructive pulmonary disease (Review). Cochrane Database Syst Rev. 2018;10(10):CD010257.</li></ol>                                                                                                                                                                                                                                                                                                                                                                                                                                                                                                                                                                                                                                                                                                                                                                                                                                                                                                                                                                                                                                                                                                                                                                                                                                                                                                                                                                |
| <b>Ensayos clínicos aleatorizados:</b><br><b>A. Pacientes ambulatorios:</b> <ol style="list-style-type: none"><li>1. Allegra LGC, Grossi E, Pozzi E, Blasi F, Frigerio D, Nastri A, et al. The role of antibiotics in the treatment of chronic bronchitis exacerbation: follow-up of a multicenter study. Italian Journal of Chest Disease 1991;45(3):138-48.</li><li>2. Anthonisen NR, Manfreda J, Warren CP, Hershfield ES, Harding GK, Nelson NA. Antibiotic therapy in exacerbations of chronic obstructive pulmonary disease. Annals of Internal Medicine 1987;106(2):196-204.</li><li>3. Berry DG, Fry J, Hindley CP. Exacerbations of chronic bronchitis treatment with oxytetracycline. Lancet 1960; 1:137-9.</li><li>4. Brusse-Keizer MG, van der Valk PD, Hendrix MG, Kerstjens HA, van der Palen J. Antibiotics in patients with a mild to moderate home-treated COPD exacerbation: the ABC trial. American Journal of Respiratory and Critical Care Medicine 2009;179: A1493.</li><li>5. Elmes PC, Fletcher CM, Dutton AA. Prophylactic use of oxytetracycline for exacerbations of chronic bronchitis. British Medical Journal 1957; 2:1272-5.</li><li>6. Fear EC, Edwards G. Antibiotic regimes in chronic bronchitis. British Journal of Diseases of the Chest 1962; 56:153-62.</li><li>7. Hassan, WA, Shalan I, Elsobhy M. Impact of antibiotics on acute exacerbations of COPD. Egyptian Journal of Chest Diseases and Tuberculosis 2015;64(3):579-85.</li><li>8. Jørgensen AF, Coolidge J, Pedersen PA, Petersen KP, WaldorG S, Widding E. Amoxicillin in treatment of acute uncomplicated exacerbations of chronic bronchitis.</li></ol> |

- A double-blind, placebo controlled multicentre study in general practice. *Scandinavian Journal of Primary Health Care* 1992;10(1):7-11.
9. Llor C, Moragas A, Hernandez S, Bayona C, Miravittles M. Efficacy of antibiotic therapy for acute exacerbations of mild to moderate COPD. *American Journal of Respiratory and Critical Care Medicine* 2012;186(8):716-23.
  10. Sachs AP, Koëter GH, Groenier KH, van der Waaij D, Schiphuis J, Meyboom-de Jong B. Changes in symptoms, peak expiratory flow, and sputum flora during treatment with antibiotics of exacerbations in patients with chronic obstructive pulmonary disease in general practice. *Thorax* 1995;50(7):758-63.
  11. van Velzen P, Ter Riet G, Bresser P, Baars JJ, van den Berg BTJ, van den Berg JWK, et al. Doxycycline for outpatient-treated acute exacerbations of COPD: a randomised double-blind placebo-controlled trial. *Lancet Respiratory Medicine* 2017;5(6):492-9.
- B. Pacientes hospitalarios:**
1. Alonso Martinez JL, Rubio Obanos MT, Samperiz Legarre AL, Escolar Castellon F, Carrasco del Amo ME. Antibiotic treatment for acute episodes of chronic obstructive pulmonary disease [Tratamiento con antibióticos de las agudizaciones de la enfermedad pulmonar obstructiva crónica]. *Anales de Medicina Interna* 1992;9(8):377-80.
  2. Daniels JM, Snijders D, de Graaff CS, Vlaspolter F, Jansen HM, Boersma WG. Antibiotics in addition to systemic corticosteroids for acute exacerbations of chronic obstructive pulmonary disease. *American Journal of Respiratory and Critical Care Medicine* 2010;181(2):150-7.
  3. Manresa F, Blavia R, Martin R, Linares J, Rodriguez B, Verdaguer R. Antibiotics for exacerbations of chronic bronchitis. *Lancet* 1987;2(8555):394-5.
  4. Petersen ES, Esmann V, Honcke P, Munkner C. A controlled study of the effect of treatment on chronic bronchitis. An evaluation using pulmonary function tests. *Acta Medica Scandinavica* 1967;182(3):293-305.
  5. Pines A, Raafat H, Plucinski K, Greenfield JS, Solari M. Antibiotic regimens in severe and acute purulent exacerbations of chronic bronchitis. *British Medical Journal* 1968;2(607):735-8.
  6. Pines A, Raafat H, Greenfield JS, Linsell WD, Solari ME. Antibiotic regimens in moderately ill patients with purulent exacerbations of chronic bronchitis. *British Journal of Diseases of the Chest* 1972;66(2):107-15.
  7. Wang JX, Zhang SM, Li XH, Zhang Y, Xu ZY, Cao B. Acute exacerbations of chronic obstructive pulmonary disease with low serum procalcitonin values do not benefit from antibiotic treatment: a prospective randomized controlled trial. *International Journal of Infectious Diseases* 2016; 48:40-5.
  8. Vermeersch K, Gabrovská M, Aumann J, Demedts IK, Corhay JL, Marchand E, et al. Azithromycin during Acute Chronic Obstructive Pulmonary Disease Exacerbations Requiring Hospitalization (BACE). A Multicenter, Randomized, Double-Blind, Placebo-controlled Trial. *Am J Respir Crit Care Med*. 2019;200(7):857-868.
- C. Pacientes críticos, unidad cuidados intensivos:**
1. Noura S, Marghli S, Belghith M, Besbes L, Elatrous S, Abroug F. Once daily oral ofloxacin in chronic obstructive pulmonary disease exacerbation requiring mechanical ventilation: a randomised placebo-controlled trial. *Lancet* 2001;358(9298):2020-5.
- Evaluación económica:**
1. Finch AP, van Velzen P, Ter Riet G, Sterk PJ, Prins JM, Bosmans JE. Doxycycline Added to Prednisolone in Outpatient-Treated Acute Exacerbations of COPD: A Cost-Effectiveness Analysis Alongside a Randomised Controlled Trial. *Pharmacoeconomics*. 2019;37(5):689-699.

**PACIENTES AMBULATORIOS: ANTIBIÓTICOS vs PLACEBO****Fracaso terapéutico dentro de las cuatro semanas**

La definición de esta variable fue heterogénea entre los distintos estudios e incluyó la no-resolución o empeoramiento de los síntomas tras el tratamiento, muerte debido a exacerbación o necesidad de tratamiento adicional con antibióticos u otros tratamientos para la COPD.

En el análisis conjunto de los datos (7 ECAs, 1191 pacientes y 301 eventos) muestra que el tratamiento con antibióticos (amoxicilina, doxiciclina, amoxicilina/ácido clavulánico, ciprofloxacina o co-trimoxazol) reduce de forma significativa el fracaso terapéutico respecto a placebo: riesgo relativo (RR) de 0.72 (0.56 a 0.94); 83 menos por 1000 (de 130 menos a 18 menos).

La confianza con los resultados es baja (ver tabla de resumen de resultados).

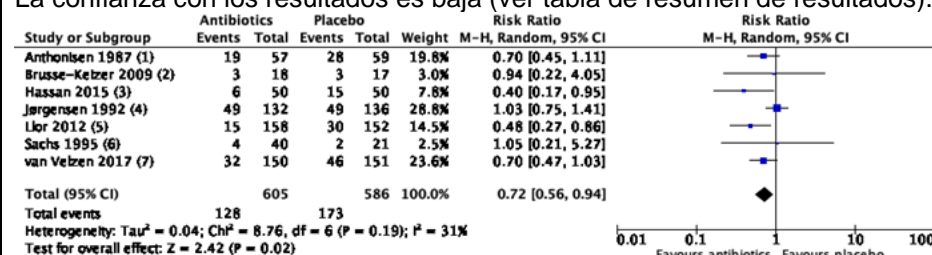**Footnotes**

- (1) within 21 days  
(2) 28 days  
(3) day 21  
(4) day 8  
(5) 20 days  
(6) failure between 4–24 days  
(7) day 21

**Calidad  
baja**

**Mortalidad por cualquier causa**

Uno de los ECAs seleccionados aportó resultados para mortalidad por cualquier causa a los dos años de seguimiento.

Los resultados no muestran diferencias significativas entre el tratamiento antibiótico (doxiciclina) y placebo aunque el número de evento es muy escaso: OR 1.27 (0.49 a 3.30); 13 más por 1000 (de 26 menos a 103 más).

La confianza con los resultados es baja (ver tabla de resumen de resultados).

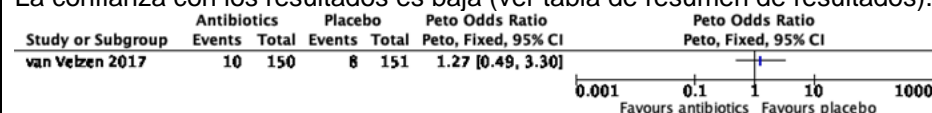

**Calidad  
baja**

**Frecuencia de agudizaciones**

Uno de los ECAs seleccionados aportó resultados para las exacerbaciones a las 4 semanas de seguimiento.

Los resultados no muestran diferencias significativas entre el tratamiento antibiótico y el placebo aunque el número de evento es muy escaso: RR 1.89 (0.19 a 18.97); 52 más por 1000 (de 48 menos a 1000 más).

La confianza con los resultados es baja (ver tabla de resumen de resultados).

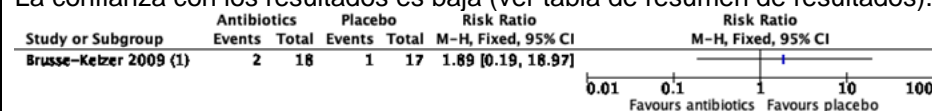**Footnotes**

- (1) relapse within 4 weeks

**Calidad  
baja**

| <b>Tiempo hasta la siguiente agudización</b>                                                                                                                                                                                                                                                                                                                                                                                                                                                                                                        |             |                     |             |         |      |         |                                      |  |                                      |      |    |       |      |    |       |                        |      |      |    |      |      |    |                      |  |
|-----------------------------------------------------------------------------------------------------------------------------------------------------------------------------------------------------------------------------------------------------------------------------------------------------------------------------------------------------------------------------------------------------------------------------------------------------------------------------------------------------------------------------------------------------|-------------|---------------------|-------------|---------|------|---------|--------------------------------------|--|--------------------------------------|------|----|-------|------|----|-------|------------------------|------|------|----|------|------|----|----------------------|--|
| Dos de los ECAs seleccionados evaluaron el tiempo hasta la siguiente agudización tras uno y dos años de seguimiento. Los resultados se describen por separado al no ser posible el meta-análisis de los resultados.                                                                                                                                                                                                                                                                                                                                 |             | <b>Calidad baja</b> |             |         |      |         |                                      |  |                                      |      |    |       |      |    |       |                        |      |      |    |      |      |    |                      |  |
| En un ECA El tratamiento con antibiótico amoxicilina/ácido clavulánico mostró un incremento significativo del tiempo hasta la primera exacerbación: media 73 días más respecto al placebo; mediana 233 días (IQR 110 a 365 días) con antibióticos vs. 160 días (IQR 66 a 365 días) con placebo ( <i>P</i> =0.015).                                                                                                                                                                                                                                  |             |                     |             |         |      |         |                                      |  |                                      |      |    |       |      |    |       |                        |      |      |    |      |      |    |                      |  |
| Por el contrario, en otro ECAs el tratamiento con doxicilina no mostró diferencias frente a placebo: 148 días (IQR 95 a 200 días) vs. 161 días (IQR 118 a 211 días); (HR 1.01, 95% CI: 0.79-1.31, <i>P</i> =0.91).                                                                                                                                                                                                                                                                                                                                  |             |                     |             |         |      |         |                                      |  |                                      |      |    |       |      |    |       |                        |      |      |    |      |      |    |                      |  |
| La confianza con los resultados es baja (ver tabla de resumen de resultados).                                                                                                                                                                                                                                                                                                                                                                                                                                                                       |             |                     |             |         |      |         |                                      |  |                                      |      |    |       |      |    |       |                        |      |      |    |      |      |    |                      |  |
| <b>Calidad de vida</b>                                                                                                                                                                                                                                                                                                                                                                                                                                                                                                                              |             |                     |             |         |      |         |                                      |  |                                      |      |    |       |      |    |       |                        |      |      |    |      |      |    |                      |  |
| Un ECAs que evaluó los resultados de calidad de vida (Chronic COPD Questionnaire - CCQ) no mostró diferencias significativas entre los grupos (amoxicilina/ácido clavulánico vs placebo): -2.3 (2.7) vs -2.3 (2.7); MD 0 (1.79 menos a 1.79 más alto).                                                                                                                                                                                                                                                                                              |             | <b>Calidad baja</b> |             |         |      |         |                                      |  |                                      |      |    |       |      |    |       |                        |      |      |    |      |      |    |                      |  |
| La confianza con los resultados es baja (ver tabla de resumen de resultados).                                                                                                                                                                                                                                                                                                                                                                                                                                                                       |             |                     |             |         |      |         |                                      |  |                                      |      |    |       |      |    |       |                        |      |      |    |      |      |    |                      |  |
| <table><tr><th rowspan="2">Study or Subgroup</th><th colspan="3">Antibiotics</th><th colspan="3">Placebo</th><th rowspan="2">Mean Difference<br/>IV, Fixed, 95% CI</th></tr><tr><th>Mean</th><th>SD</th><th>Total</th><th>Mean</th><th>SD</th><th>Total</th></tr><tr><td>Brusse-Kelzer 2009 (1)</td><td>-2.3</td><td>2.7</td><td>18</td><td>-2.3</td><td>2.7</td><td>17</td><td>0.00 [-1.79, 1.79]</td></tr></table> <div><p>Footnotes</p><p>(1) CCQ</p></div> 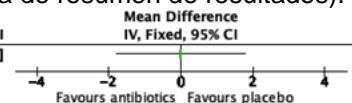 |             | Study or Subgroup   | Antibiotics |         |      | Placebo |                                      |  | Mean Difference<br>IV, Fixed, 95% CI | Mean | SD | Total | Mean | SD | Total | Brusse-Kelzer 2009 (1) | -2.3 | 2.7  | 18 | -2.3 | 2.7  | 17 | 0.00 [-1.79, 1.79]   |  |
| Study or Subgroup                                                                                                                                                                                                                                                                                                                                                                                                                                                                                                                                   | Antibiotics |                     |             | Placebo |      |         | Mean Difference<br>IV, Fixed, 95% CI |  |                                      |      |    |       |      |    |       |                        |      |      |    |      |      |    |                      |  |
|                                                                                                                                                                                                                                                                                                                                                                                                                                                                                                                                                     | Mean        | SD                  | Total       | Mean    | SD   | Total   |                                      |  |                                      |      |    |       |      |    |       |                        |      |      |    |      |      |    |                      |  |
| Brusse-Kelzer 2009 (1)                                                                                                                                                                                                                                                                                                                                                                                                                                                                                                                              | -2.3        | 2.7                 | 18          | -2.3    | 2.7  | 17      | 0.00 [-1.79, 1.79]                   |  |                                      |      |    |       |      |    |       |                        |      |      |    |      |      |    |                      |  |
| <b>Disnea</b>                                                                                                                                                                                                                                                                                                                                                                                                                                                                                                                                       |             |                     |             |         |      |         |                                      |  |                                      |      |    |       |      |    |       |                        |      |      |    |      |      |    |                      |  |
| En uno de los ECAs seleccionados se reporta datos (35 pacientes) sobre disnea (evaluada como una de las dimensiones del Chronic Respiratory Questionnaire - CRQ) sin diferencias significativas entre los grupos (amoxicilina/ácido clavulánico vs placebo): 0.5 (1.3) vs 0.5 (1.6); MD 0 (0.97 menos a 0.97 más alto).                                                                                                                                                                                                                             |             | <b>Calidad baja</b> |             |         |      |         |                                      |  |                                      |      |    |       |      |    |       |                        |      |      |    |      |      |    |                      |  |
| La confianza con los resultados es baja (ver tabla de resumen de resultados).                                                                                                                                                                                                                                                                                                                                                                                                                                                                       |             |                     |             |         |      |         |                                      |  |                                      |      |    |       |      |    |       |                        |      |      |    |      |      |    |                      |  |
| <table><tr><th rowspan="2">Study or Subgroup</th><th colspan="3">Antibiotics</th><th colspan="3">Placebo</th><th rowspan="2">Mean Difference<br/>IV, Fixed, 95% CI</th></tr><tr><th>Mean</th><th>SD</th><th>Total</th><th>Mean</th><th>SD</th><th>Total</th></tr><tr><td>Brusse-Kelzer 2009</td><td>0.5</td><td>1.3</td><td>18</td><td>0.5</td><td>1.6</td><td>17</td><td>0.00 [-0.97, 0.97]</td></tr></table>                                                  |             | Study or Subgroup   | Antibiotics |         |      | Placebo |                                      |  | Mean Difference<br>IV, Fixed, 95% CI | Mean | SD | Total | Mean | SD | Total | Brusse-Kelzer 2009     | 0.5  | 1.3  | 18 | 0.5  | 1.6  | 17 | 0.00 [-0.97, 0.97]   |  |
| Study or Subgroup                                                                                                                                                                                                                                                                                                                                                                                                                                                                                                                                   | Antibiotics |                     |             | Placebo |      |         | Mean Difference<br>IV, Fixed, 95% CI |  |                                      |      |    |       |      |    |       |                        |      |      |    |      |      |    |                      |  |
|                                                                                                                                                                                                                                                                                                                                                                                                                                                                                                                                                     | Mean        | SD                  | Total       | Mean    | SD   | Total   |                                      |  |                                      |      |    |       |      |    |       |                        |      |      |    |      |      |    |                      |  |
| Brusse-Kelzer 2009                                                                                                                                                                                                                                                                                                                                                                                                                                                                                                                                  | 0.5         | 1.3                 | 18          | 0.5     | 1.6  | 17      | 0.00 [-0.97, 0.97]                   |  |                                      |      |    |       |      |    |       |                        |      |      |    |      |      |    |                      |  |
| <b>Días de baja</b>                                                                                                                                                                                                                                                                                                                                                                                                                                                                                                                                 |             |                     |             |         |      |         |                                      |  |                                      |      |    |       |      |    |       |                        |      |      |    |      |      |    |                      |  |
| En uno de los ECAs evaluó los días de baja laboral. Se observó que el tratamiento con oxitetraciclina se asoció a una disminución significativa del tiempo de baja en relación con placebo: MD 5.18 menos (6.08 menos a 4.38 menos). El estudio fue realizado en 1957.                                                                                                                                                                                                                                                                              |             | <b>Calidad baja</b> |             |         |      |         |                                      |  |                                      |      |    |       |      |    |       |                        |      |      |    |      |      |    |                      |  |
| La confianza con los resultados es baja (ver tabla de resumen de resultados).                                                                                                                                                                                                                                                                                                                                                                                                                                                                       |             |                     |             |         |      |         |                                      |  |                                      |      |    |       |      |    |       |                        |      |      |    |      |      |    |                      |  |
| <table><tr><th rowspan="2">Study or Subgroup</th><th colspan="3">Antibiotics</th><th colspan="3">Placebo</th><th rowspan="2">Mean Difference<br/>IV, Fixed, 95% CI</th></tr><tr><th>Mean</th><th>SD</th><th>Total</th><th>Mean</th><th>SD</th><th>Total</th></tr><tr><td>Elmes 1957</td><td>4.25</td><td>0.96</td><td>42</td><td>9.43</td><td>2.96</td><td>46</td><td>-5.18 [-6.08, -4.28]</td></tr></table>                                                    |             | Study or Subgroup   | Antibiotics |         |      | Placebo |                                      |  | Mean Difference<br>IV, Fixed, 95% CI | Mean | SD | Total | Mean | SD | Total | Elmes 1957             | 4.25 | 0.96 | 42 | 9.43 | 2.96 | 46 | -5.18 [-6.08, -4.28] |  |
| Study or Subgroup                                                                                                                                                                                                                                                                                                                                                                                                                                                                                                                                   | Antibiotics |                     |             | Placebo |      |         | Mean Difference<br>IV, Fixed, 95% CI |  |                                      |      |    |       |      |    |       |                        |      |      |    |      |      |    |                      |  |
|                                                                                                                                                                                                                                                                                                                                                                                                                                                                                                                                                     | Mean        | SD                  | Total       | Mean    | SD   | Total   |                                      |  |                                      |      |    |       |      |    |       |                        |      |      |    |      |      |    |                      |  |
| Elmes 1957                                                                                                                                                                                                                                                                                                                                                                                                                                                                                                                                          | 4.25        | 0.96                | 42          | 9.43    | 2.96 | 46      | -5.18 [-6.08, -4.28]                 |  |                                      |      |    |       |      |    |       |                        |      |      |    |      |      |    |                      |  |

| PACIENTES HOSPITALARIOS: ANTIBIÓTICOS vs PLACEBO                                                                                                                                                                                                                                                                                                                                                                                                                                                                                                                                                                                                                                                                                                                                                                                                                                                                                                                                                                                                                                                                                                                                                                                                                                                                                                                                                                                                                                                                                                                                                                                                                                                                                                                                                                                                                                                                                                                                                                                                                                                                                                                                                                                                                                                                                                                                                                                                                                                                                                                                                                                                                                                                                                                                                                                                                                                          |                       |                      |                   |                  |        |                                   |                                   |                       |  |                   |                       |                      |                   |                  |        |                                   |                                   |                        |  |  |  |  |  |  |  |               |   |    |   |    |      |                   |  |                      |   |    |   |    |      |                   |  |            |   |    |    |    |      |                   |  |                  |    |     |    |     |       |                   |  |                 |    |     |    |     |       |                   |  |                |    |     |    |    |       |                   |  |                   |  |     |  |     |       |                   |  |              |     |  |     |  |  |  |  |                                                                                                          |  |  |  |  |  |  |  |                                              |  |  |  |  |  |  |  |                  |  |  |  |  |  |  |  |             |   |    |    |    |      |                   |  |                   |  |    |  |    |      |                   |  |              |   |  |    |  |  |  |  |                               |  |  |  |  |  |  |  |                                                |  |  |  |  |  |  |  |                |  |     |  |     |        |                   |  |              |     |  |     |  |  |  |  |                                                                                                            |  |  |  |  |  |  |  |                                               |  |  |  |  |  |  |  |                                                                                                     |  |  |  |  |  |  |  |           |  |  |  |  |  |  |  |             |  |  |  |  |  |  |  |            |  |  |  |  |  |  |  |                                       |  |  |  |  |  |  |  |  |  |
|-----------------------------------------------------------------------------------------------------------------------------------------------------------------------------------------------------------------------------------------------------------------------------------------------------------------------------------------------------------------------------------------------------------------------------------------------------------------------------------------------------------------------------------------------------------------------------------------------------------------------------------------------------------------------------------------------------------------------------------------------------------------------------------------------------------------------------------------------------------------------------------------------------------------------------------------------------------------------------------------------------------------------------------------------------------------------------------------------------------------------------------------------------------------------------------------------------------------------------------------------------------------------------------------------------------------------------------------------------------------------------------------------------------------------------------------------------------------------------------------------------------------------------------------------------------------------------------------------------------------------------------------------------------------------------------------------------------------------------------------------------------------------------------------------------------------------------------------------------------------------------------------------------------------------------------------------------------------------------------------------------------------------------------------------------------------------------------------------------------------------------------------------------------------------------------------------------------------------------------------------------------------------------------------------------------------------------------------------------------------------------------------------------------------------------------------------------------------------------------------------------------------------------------------------------------------------------------------------------------------------------------------------------------------------------------------------------------------------------------------------------------------------------------------------------------------------------------------------------------------------------------------------------------|-----------------------|----------------------|-------------------|------------------|--------|-----------------------------------|-----------------------------------|-----------------------|--|-------------------|-----------------------|----------------------|-------------------|------------------|--------|-----------------------------------|-----------------------------------|------------------------|--|--|--|--|--|--|--|---------------|---|----|---|----|------|-------------------|--|----------------------|---|----|---|----|------|-------------------|--|------------|---|----|----|----|------|-------------------|--|------------------|----|-----|----|-----|-------|-------------------|--|-----------------|----|-----|----|-----|-------|-------------------|--|----------------|----|-----|----|----|-------|-------------------|--|-------------------|--|-----|--|-----|-------|-------------------|--|--------------|-----|--|-----|--|--|--|--|----------------------------------------------------------------------------------------------------------|--|--|--|--|--|--|--|----------------------------------------------|--|--|--|--|--|--|--|------------------|--|--|--|--|--|--|--|-------------|---|----|----|----|------|-------------------|--|-------------------|--|----|--|----|------|-------------------|--|--------------|---|--|----|--|--|--|--|-------------------------------|--|--|--|--|--|--|--|------------------------------------------------|--|--|--|--|--|--|--|----------------|--|-----|--|-----|--------|-------------------|--|--------------|-----|--|-----|--|--|--|--|------------------------------------------------------------------------------------------------------------|--|--|--|--|--|--|--|-----------------------------------------------|--|--|--|--|--|--|--|-----------------------------------------------------------------------------------------------------|--|--|--|--|--|--|--|-----------|--|--|--|--|--|--|--|-------------|--|--|--|--|--|--|--|------------|--|--|--|--|--|--|--|---------------------------------------|--|--|--|--|--|--|--|--|--|
| Fracaso terapéutico                                                                                                                                                                                                                                                                                                                                                                                                                                                                                                                                                                                                                                                                                                                                                                                                                                                                                                                                                                                                                                                                                                                                                                                                                                                                                                                                                                                                                                                                                                                                                                                                                                                                                                                                                                                                                                                                                                                                                                                                                                                                                                                                                                                                                                                                                                                                                                                                                                                                                                                                                                                                                                                                                                                                                                                                                                                                                       |                       |                      |                   |                  |        |                                   |                                   | Calidad moderada      |  |                   |                       |                      |                   |                  |        |                                   |                                   |                        |  |  |  |  |  |  |  |               |   |    |   |    |      |                   |  |                      |   |    |   |    |      |                   |  |            |   |    |    |    |      |                   |  |                  |    |     |    |     |       |                   |  |                 |    |     |    |     |       |                   |  |                |    |     |    |    |       |                   |  |                   |  |     |  |     |       |                   |  |              |     |  |     |  |  |  |  |                                                                                                          |  |  |  |  |  |  |  |                                              |  |  |  |  |  |  |  |                  |  |  |  |  |  |  |  |             |   |    |    |    |      |                   |  |                   |  |    |  |    |      |                   |  |              |   |  |    |  |  |  |  |                               |  |  |  |  |  |  |  |                                                |  |  |  |  |  |  |  |                |  |     |  |     |        |                   |  |              |     |  |     |  |  |  |  |                                                                                                            |  |  |  |  |  |  |  |                                               |  |  |  |  |  |  |  |                                                                                                     |  |  |  |  |  |  |  |           |  |  |  |  |  |  |  |             |  |  |  |  |  |  |  |            |  |  |  |  |  |  |  |                                       |  |  |  |  |  |  |  |  |  |
| Pacientes hospitalarios:<br>La definición de esta variable fue heterogénea entre los distintos estudios e incluyó la no-resolución o empeoramiento de los síntomas tras el tratamiento, muerte debido a agudización o necesidad de tratamiento adicional con antibióticos u otros tratamientos para la COPD.                                                                                                                                                                                                                                                                                                                                                                                                                                                                                                                                                                                                                                                                                                                                                                                                                                                                                                                                                                                                                                                                                                                                                                                                                                                                                                                                                                                                                                                                                                                                                                                                                                                                                                                                                                                                                                                                                                                                                                                                                                                                                                                                                                                                                                                                                                                                                                                                                                                                                                                                                                                              |                       |                      |                   |                  |        |                                   |                                   |                       |  |                   |                       |                      |                   |                  |        |                                   |                                   |                        |  |  |  |  |  |  |  |               |   |    |   |    |      |                   |  |                      |   |    |   |    |      |                   |  |            |   |    |    |    |      |                   |  |                  |    |     |    |     |       |                   |  |                 |    |     |    |     |       |                   |  |                |    |     |    |    |       |                   |  |                   |  |     |  |     |       |                   |  |              |     |  |     |  |  |  |  |                                                                                                          |  |  |  |  |  |  |  |                                              |  |  |  |  |  |  |  |                  |  |  |  |  |  |  |  |             |   |    |    |    |      |                   |  |                   |  |    |  |    |      |                   |  |              |   |  |    |  |  |  |  |                               |  |  |  |  |  |  |  |                                                |  |  |  |  |  |  |  |                |  |     |  |     |        |                   |  |              |     |  |     |  |  |  |  |                                                                                                            |  |  |  |  |  |  |  |                                               |  |  |  |  |  |  |  |                                                                                                     |  |  |  |  |  |  |  |           |  |  |  |  |  |  |  |             |  |  |  |  |  |  |  |            |  |  |  |  |  |  |  |                                       |  |  |  |  |  |  |  |  |  |
| En el análisis conjunto de los resultados (6 ECAs, 1104 pacientes y 446 eventos), el tratamiento con antibióticos muestra una reducción significativa de los fracasos terapéuticos respecto a placebo: RR 0.80 (0.68 a 0.95); 88 menos por 1000 (de 141 a 22 menos).                                                                                                                                                                                                                                                                                                                                                                                                                                                                                                                                                                                                                                                                                                                                                                                                                                                                                                                                                                                                                                                                                                                                                                                                                                                                                                                                                                                                                                                                                                                                                                                                                                                                                                                                                                                                                                                                                                                                                                                                                                                                                                                                                                                                                                                                                                                                                                                                                                                                                                                                                                                                                                      |                       |                      |                   |                  |        |                                   |                                   |                       |  |                   |                       |                      |                   |                  |        |                                   |                                   |                        |  |  |  |  |  |  |  |               |   |    |   |    |      |                   |  |                      |   |    |   |    |      |                   |  |            |   |    |    |    |      |                   |  |                  |    |     |    |     |       |                   |  |                 |    |     |    |     |       |                   |  |                |    |     |    |    |       |                   |  |                   |  |     |  |     |       |                   |  |              |     |  |     |  |  |  |  |                                                                                                          |  |  |  |  |  |  |  |                                              |  |  |  |  |  |  |  |                  |  |  |  |  |  |  |  |             |   |    |    |    |      |                   |  |                   |  |    |  |    |      |                   |  |              |   |  |    |  |  |  |  |                               |  |  |  |  |  |  |  |                                                |  |  |  |  |  |  |  |                |  |     |  |     |        |                   |  |              |     |  |     |  |  |  |  |                                                                                                            |  |  |  |  |  |  |  |                                               |  |  |  |  |  |  |  |                                                                                                     |  |  |  |  |  |  |  |           |  |  |  |  |  |  |  |             |  |  |  |  |  |  |  |            |  |  |  |  |  |  |  |                                       |  |  |  |  |  |  |  |  |  |
| La confianza con los resultados es moderada (ver tabla de resumen de resultados).                                                                                                                                                                                                                                                                                                                                                                                                                                                                                                                                                                                                                                                                                                                                                                                                                                                                                                                                                                                                                                                                                                                                                                                                                                                                                                                                                                                                                                                                                                                                                                                                                                                                                                                                                                                                                                                                                                                                                                                                                                                                                                                                                                                                                                                                                                                                                                                                                                                                                                                                                                                                                                                                                                                                                                                                                         |                       |                      |                   |                  |        |                                   |                                   |                       |  |                   |                       |                      |                   |                  |        |                                   |                                   |                        |  |  |  |  |  |  |  |               |   |    |   |    |      |                   |  |                      |   |    |   |    |      |                   |  |            |   |    |    |    |      |                   |  |                  |    |     |    |     |       |                   |  |                 |    |     |    |     |       |                   |  |                |    |     |    |    |       |                   |  |                   |  |     |  |     |       |                   |  |              |     |  |     |  |  |  |  |                                                                                                          |  |  |  |  |  |  |  |                                              |  |  |  |  |  |  |  |                  |  |  |  |  |  |  |  |             |   |    |    |    |      |                   |  |                   |  |    |  |    |      |                   |  |              |   |  |    |  |  |  |  |                               |  |  |  |  |  |  |  |                                                |  |  |  |  |  |  |  |                |  |     |  |     |        |                   |  |              |     |  |     |  |  |  |  |                                                                                                            |  |  |  |  |  |  |  |                                               |  |  |  |  |  |  |  |                                                                                                     |  |  |  |  |  |  |  |           |  |  |  |  |  |  |  |             |  |  |  |  |  |  |  |            |  |  |  |  |  |  |  |                                       |  |  |  |  |  |  |  |  |  |
| Pacientes UCI:<br>Un ECA (93 pacientes críticos) muestra una reducción significativa del tratamiento con ofloxacino respecto a placebo: RR 0.19 (0.08 a 0.45); 458 menos por 1000 (de 520 menos a 311 menos).                                                                                                                                                                                                                                                                                                                                                                                                                                                                                                                                                                                                                                                                                                                                                                                                                                                                                                                                                                                                                                                                                                                                                                                                                                                                                                                                                                                                                                                                                                                                                                                                                                                                                                                                                                                                                                                                                                                                                                                                                                                                                                                                                                                                                                                                                                                                                                                                                                                                                                                                                                                                                                                                                             |                       |                      |                   |                  |        |                                   |                                   | Calidad moderada      |  |                   |                       |                      |                   |                  |        |                                   |                                   |                        |  |  |  |  |  |  |  |               |   |    |   |    |      |                   |  |                      |   |    |   |    |      |                   |  |            |   |    |    |    |      |                   |  |                  |    |     |    |     |       |                   |  |                 |    |     |    |     |       |                   |  |                |    |     |    |    |       |                   |  |                   |  |     |  |     |       |                   |  |              |     |  |     |  |  |  |  |                                                                                                          |  |  |  |  |  |  |  |                                              |  |  |  |  |  |  |  |                  |  |  |  |  |  |  |  |             |   |    |    |    |      |                   |  |                   |  |    |  |    |      |                   |  |              |   |  |    |  |  |  |  |                               |  |  |  |  |  |  |  |                                                |  |  |  |  |  |  |  |                |  |     |  |     |        |                   |  |              |     |  |     |  |  |  |  |                                                                                                            |  |  |  |  |  |  |  |                                               |  |  |  |  |  |  |  |                                                                                                     |  |  |  |  |  |  |  |           |  |  |  |  |  |  |  |             |  |  |  |  |  |  |  |            |  |  |  |  |  |  |  |                                       |  |  |  |  |  |  |  |  |  |
| La confianza con los resultados es moderada (ver tabla de resumen de resultados).                                                                                                                                                                                                                                                                                                                                                                                                                                                                                                                                                                                                                                                                                                                                                                                                                                                                                                                                                                                                                                                                                                                                                                                                                                                                                                                                                                                                                                                                                                                                                                                                                                                                                                                                                                                                                                                                                                                                                                                                                                                                                                                                                                                                                                                                                                                                                                                                                                                                                                                                                                                                                                                                                                                                                                                                                         |                       |                      |                   |                  |        |                                   |                                   |                       |  |                   |                       |                      |                   |                  |        |                                   |                                   |                        |  |  |  |  |  |  |  |               |   |    |   |    |      |                   |  |                      |   |    |   |    |      |                   |  |            |   |    |    |    |      |                   |  |                  |    |     |    |     |       |                   |  |                 |    |     |    |     |       |                   |  |                |    |     |    |    |       |                   |  |                   |  |     |  |     |       |                   |  |              |     |  |     |  |  |  |  |                                                                                                          |  |  |  |  |  |  |  |                                              |  |  |  |  |  |  |  |                  |  |  |  |  |  |  |  |             |   |    |    |    |      |                   |  |                   |  |    |  |    |      |                   |  |              |   |  |    |  |  |  |  |                               |  |  |  |  |  |  |  |                                                |  |  |  |  |  |  |  |                |  |     |  |     |        |                   |  |              |     |  |     |  |  |  |  |                                                                                                            |  |  |  |  |  |  |  |                                               |  |  |  |  |  |  |  |                                                                                                     |  |  |  |  |  |  |  |           |  |  |  |  |  |  |  |             |  |  |  |  |  |  |  |            |  |  |  |  |  |  |  |                                       |  |  |  |  |  |  |  |  |  |
| <table><thead><tr><th>Study or Subgroup</th><th>Antibiotics<br/>Events</th><th>Antibiotics<br/>Total</th><th>Placebo<br/>Events</th><th>Placebo<br/>Total</th><th>Weight</th><th>Risk Ratio<br/>M-H, Random, 95% CI</th><th>Risk Ratio<br/>M-H, Random, 95% CI</th></tr></thead><tbody><tr><td colspan="8"><b>1.1.1 Inpatient</b></td></tr><tr><td>Wang 2016 (1)</td><td>6</td><td>95</td><td>4</td><td>96</td><td>4.6%</td><td>1.52 [0.44, 5.20]</td><td></td></tr><tr><td>Alonso Martinez 1992</td><td>4</td><td>61</td><td>6</td><td>29</td><td>4.9%</td><td>0.32 [0.10, 1.04]</td><td></td></tr><tr><td>Pines 1968</td><td>5</td><td>15</td><td>12</td><td>15</td><td>9.7%</td><td>0.42 [0.20, 0.89]</td><td></td></tr><tr><td>Daniels 2010 (2)</td><td>50</td><td>128</td><td>65</td><td>137</td><td>22.8%</td><td>0.82 [0.62, 1.09]</td><td></td></tr><tr><td>Vermeersch 2019</td><td>69</td><td>147</td><td>86</td><td>154</td><td>24.7%</td><td>0.84 [0.67, 1.05]</td><td></td></tr><tr><td>Pines 1972 (3)</td><td>93</td><td>160</td><td>46</td><td>67</td><td>25.2%</td><td>0.85 [0.69, 1.04]</td><td></td></tr><tr><td>Subtotal (95% CI)</td><td></td><td>606</td><td></td><td>498</td><td>92.0%</td><td>0.80 [0.68, 0.95]</td><td></td></tr><tr><td>Total events</td><td>227</td><td></td><td>219</td><td></td><td></td><td></td><td></td></tr><tr><td colspan="8">Heterogeneity: Tau<sup>2</sup> = 0.01; Chi<sup>2</sup> = 6.64, df = 5 (P = 0.25); I<sup>2</sup> = 25%</td></tr><tr><td colspan="8">Test for overall effect: Z = 2.51 (P = 0.01)</td></tr><tr><td colspan="8"><b>1.1.2 ICU</b></td></tr><tr><td>Nouira 2001</td><td>5</td><td>47</td><td>26</td><td>46</td><td>8.0%</td><td>0.19 [0.08, 0.45]</td><td></td></tr><tr><td>Subtotal (95% CI)</td><td></td><td>47</td><td></td><td>46</td><td>8.0%</td><td>0.19 [0.08, 0.45]</td><td></td></tr><tr><td>Total events</td><td>5</td><td></td><td>26</td><td></td><td></td><td></td><td></td></tr><tr><td colspan="8">Heterogeneity: Not applicable</td></tr><tr><td colspan="8">Test for overall effect: Z = 3.78 (P = 0.0002)</td></tr><tr><td>Total (95% CI)</td><td></td><td>653</td><td></td><td>544</td><td>100.0%</td><td>0.68 [0.51, 0.91]</td><td></td></tr><tr><td>Total events</td><td>232</td><td></td><td>245</td><td></td><td></td><td></td><td></td></tr><tr><td colspan="8">Heterogeneity: Tau<sup>2</sup> = 0.08; Chi<sup>2</sup> = 18.20, df = 6 (P = 0.006); I<sup>2</sup> = 67%</td></tr><tr><td colspan="8">Test for overall effect: Z = 2.61 (P = 0.009)</td></tr><tr><td colspan="8">Test for subgroup differences: Chi<sup>2</sup> = 10.39, df = 1 (P = 0.001), I<sup>2</sup> = 90.4%</td></tr><tr><td colspan="8">Footnotes</td></tr><tr><td colspan="8">(1) 10 days</td></tr><tr><td colspan="8">(2) day 30</td></tr><tr><td colspan="8">(3) additional antibiotics (day 7-28)</td></tr></tbody></table> |                       |                      |                   |                  |        |                                   |                                   |                       |  | Study or Subgroup | Antibiotics<br>Events | Antibiotics<br>Total | Placebo<br>Events | Placebo<br>Total | Weight | Risk Ratio<br>M-H, Random, 95% CI | Risk Ratio<br>M-H, Random, 95% CI | <b>1.1.1 Inpatient</b> |  |  |  |  |  |  |  | Wang 2016 (1) | 6 | 95 | 4 | 96 | 4.6% | 1.52 [0.44, 5.20] |  | Alonso Martinez 1992 | 4 | 61 | 6 | 29 | 4.9% | 0.32 [0.10, 1.04] |  | Pines 1968 | 5 | 15 | 12 | 15 | 9.7% | 0.42 [0.20, 0.89] |  | Daniels 2010 (2) | 50 | 128 | 65 | 137 | 22.8% | 0.82 [0.62, 1.09] |  | Vermeersch 2019 | 69 | 147 | 86 | 154 | 24.7% | 0.84 [0.67, 1.05] |  | Pines 1972 (3) | 93 | 160 | 46 | 67 | 25.2% | 0.85 [0.69, 1.04] |  | Subtotal (95% CI) |  | 606 |  | 498 | 92.0% | 0.80 [0.68, 0.95] |  | Total events | 227 |  | 219 |  |  |  |  | Heterogeneity: Tau <sup>2</sup> = 0.01; Chi <sup>2</sup> = 6.64, df = 5 (P = 0.25); I <sup>2</sup> = 25% |  |  |  |  |  |  |  | Test for overall effect: Z = 2.51 (P = 0.01) |  |  |  |  |  |  |  | <b>1.1.2 ICU</b> |  |  |  |  |  |  |  | Nouira 2001 | 5 | 47 | 26 | 46 | 8.0% | 0.19 [0.08, 0.45] |  | Subtotal (95% CI) |  | 47 |  | 46 | 8.0% | 0.19 [0.08, 0.45] |  | Total events | 5 |  | 26 |  |  |  |  | Heterogeneity: Not applicable |  |  |  |  |  |  |  | Test for overall effect: Z = 3.78 (P = 0.0002) |  |  |  |  |  |  |  | Total (95% CI) |  | 653 |  | 544 | 100.0% | 0.68 [0.51, 0.91] |  | Total events | 232 |  | 245 |  |  |  |  | Heterogeneity: Tau <sup>2</sup> = 0.08; Chi <sup>2</sup> = 18.20, df = 6 (P = 0.006); I <sup>2</sup> = 67% |  |  |  |  |  |  |  | Test for overall effect: Z = 2.61 (P = 0.009) |  |  |  |  |  |  |  | Test for subgroup differences: Chi <sup>2</sup> = 10.39, df = 1 (P = 0.001), I <sup>2</sup> = 90.4% |  |  |  |  |  |  |  | Footnotes |  |  |  |  |  |  |  | (1) 10 days |  |  |  |  |  |  |  | (2) day 30 |  |  |  |  |  |  |  | (3) additional antibiotics (day 7-28) |  |  |  |  |  |  |  |  |  |
| Study or Subgroup                                                                                                                                                                                                                                                                                                                                                                                                                                                                                                                                                                                                                                                                                                                                                                                                                                                                                                                                                                                                                                                                                                                                                                                                                                                                                                                                                                                                                                                                                                                                                                                                                                                                                                                                                                                                                                                                                                                                                                                                                                                                                                                                                                                                                                                                                                                                                                                                                                                                                                                                                                                                                                                                                                                                                                                                                                                                                         | Antibiotics<br>Events | Antibiotics<br>Total | Placebo<br>Events | Placebo<br>Total | Weight | Risk Ratio<br>M-H, Random, 95% CI | Risk Ratio<br>M-H, Random, 95% CI |                       |  |                   |                       |                      |                   |                  |        |                                   |                                   |                        |  |  |  |  |  |  |  |               |   |    |   |    |      |                   |  |                      |   |    |   |    |      |                   |  |            |   |    |    |    |      |                   |  |                  |    |     |    |     |       |                   |  |                 |    |     |    |     |       |                   |  |                |    |     |    |    |       |                   |  |                   |  |     |  |     |       |                   |  |              |     |  |     |  |  |  |  |                                                                                                          |  |  |  |  |  |  |  |                                              |  |  |  |  |  |  |  |                  |  |  |  |  |  |  |  |             |   |    |    |    |      |                   |  |                   |  |    |  |    |      |                   |  |              |   |  |    |  |  |  |  |                               |  |  |  |  |  |  |  |                                                |  |  |  |  |  |  |  |                |  |     |  |     |        |                   |  |              |     |  |     |  |  |  |  |                                                                                                            |  |  |  |  |  |  |  |                                               |  |  |  |  |  |  |  |                                                                                                     |  |  |  |  |  |  |  |           |  |  |  |  |  |  |  |             |  |  |  |  |  |  |  |            |  |  |  |  |  |  |  |                                       |  |  |  |  |  |  |  |  |  |
| <b>1.1.1 Inpatient</b>                                                                                                                                                                                                                                                                                                                                                                                                                                                                                                                                                                                                                                                                                                                                                                                                                                                                                                                                                                                                                                                                                                                                                                                                                                                                                                                                                                                                                                                                                                                                                                                                                                                                                                                                                                                                                                                                                                                                                                                                                                                                                                                                                                                                                                                                                                                                                                                                                                                                                                                                                                                                                                                                                                                                                                                                                                                                                    |                       |                      |                   |                  |        |                                   |                                   |                       |  |                   |                       |                      |                   |                  |        |                                   |                                   |                        |  |  |  |  |  |  |  |               |   |    |   |    |      |                   |  |                      |   |    |   |    |      |                   |  |            |   |    |    |    |      |                   |  |                  |    |     |    |     |       |                   |  |                 |    |     |    |     |       |                   |  |                |    |     |    |    |       |                   |  |                   |  |     |  |     |       |                   |  |              |     |  |     |  |  |  |  |                                                                                                          |  |  |  |  |  |  |  |                                              |  |  |  |  |  |  |  |                  |  |  |  |  |  |  |  |             |   |    |    |    |      |                   |  |                   |  |    |  |    |      |                   |  |              |   |  |    |  |  |  |  |                               |  |  |  |  |  |  |  |                                                |  |  |  |  |  |  |  |                |  |     |  |     |        |                   |  |              |     |  |     |  |  |  |  |                                                                                                            |  |  |  |  |  |  |  |                                               |  |  |  |  |  |  |  |                                                                                                     |  |  |  |  |  |  |  |           |  |  |  |  |  |  |  |             |  |  |  |  |  |  |  |            |  |  |  |  |  |  |  |                                       |  |  |  |  |  |  |  |  |  |
| Wang 2016 (1)                                                                                                                                                                                                                                                                                                                                                                                                                                                                                                                                                                                                                                                                                                                                                                                                                                                                                                                                                                                                                                                                                                                                                                                                                                                                                                                                                                                                                                                                                                                                                                                                                                                                                                                                                                                                                                                                                                                                                                                                                                                                                                                                                                                                                                                                                                                                                                                                                                                                                                                                                                                                                                                                                                                                                                                                                                                                                             | 6                     | 95                   | 4                 | 96               | 4.6%   | 1.52 [0.44, 5.20]                 |                                   |                       |  |                   |                       |                      |                   |                  |        |                                   |                                   |                        |  |  |  |  |  |  |  |               |   |    |   |    |      |                   |  |                      |   |    |   |    |      |                   |  |            |   |    |    |    |      |                   |  |                  |    |     |    |     |       |                   |  |                 |    |     |    |     |       |                   |  |                |    |     |    |    |       |                   |  |                   |  |     |  |     |       |                   |  |              |     |  |     |  |  |  |  |                                                                                                          |  |  |  |  |  |  |  |                                              |  |  |  |  |  |  |  |                  |  |  |  |  |  |  |  |             |   |    |    |    |      |                   |  |                   |  |    |  |    |      |                   |  |              |   |  |    |  |  |  |  |                               |  |  |  |  |  |  |  |                                                |  |  |  |  |  |  |  |                |  |     |  |     |        |                   |  |              |     |  |     |  |  |  |  |                                                                                                            |  |  |  |  |  |  |  |                                               |  |  |  |  |  |  |  |                                                                                                     |  |  |  |  |  |  |  |           |  |  |  |  |  |  |  |             |  |  |  |  |  |  |  |            |  |  |  |  |  |  |  |                                       |  |  |  |  |  |  |  |  |  |
| Alonso Martinez 1992                                                                                                                                                                                                                                                                                                                                                                                                                                                                                                                                                                                                                                                                                                                                                                                                                                                                                                                                                                                                                                                                                                                                                                                                                                                                                                                                                                                                                                                                                                                                                                                                                                                                                                                                                                                                                                                                                                                                                                                                                                                                                                                                                                                                                                                                                                                                                                                                                                                                                                                                                                                                                                                                                                                                                                                                                                                                                      | 4                     | 61                   | 6                 | 29               | 4.9%   | 0.32 [0.10, 1.04]                 |                                   |                       |  |                   |                       |                      |                   |                  |        |                                   |                                   |                        |  |  |  |  |  |  |  |               |   |    |   |    |      |                   |  |                      |   |    |   |    |      |                   |  |            |   |    |    |    |      |                   |  |                  |    |     |    |     |       |                   |  |                 |    |     |    |     |       |                   |  |                |    |     |    |    |       |                   |  |                   |  |     |  |     |       |                   |  |              |     |  |     |  |  |  |  |                                                                                                          |  |  |  |  |  |  |  |                                              |  |  |  |  |  |  |  |                  |  |  |  |  |  |  |  |             |   |    |    |    |      |                   |  |                   |  |    |  |    |      |                   |  |              |   |  |    |  |  |  |  |                               |  |  |  |  |  |  |  |                                                |  |  |  |  |  |  |  |                |  |     |  |     |        |                   |  |              |     |  |     |  |  |  |  |                                                                                                            |  |  |  |  |  |  |  |                                               |  |  |  |  |  |  |  |                                                                                                     |  |  |  |  |  |  |  |           |  |  |  |  |  |  |  |             |  |  |  |  |  |  |  |            |  |  |  |  |  |  |  |                                       |  |  |  |  |  |  |  |  |  |
| Pines 1968                                                                                                                                                                                                                                                                                                                                                                                                                                                                                                                                                                                                                                                                                                                                                                                                                                                                                                                                                                                                                                                                                                                                                                                                                                                                                                                                                                                                                                                                                                                                                                                                                                                                                                                                                                                                                                                                                                                                                                                                                                                                                                                                                                                                                                                                                                                                                                                                                                                                                                                                                                                                                                                                                                                                                                                                                                                                                                | 5                     | 15                   | 12                | 15               | 9.7%   | 0.42 [0.20, 0.89]                 |                                   |                       |  |                   |                       |                      |                   |                  |        |                                   |                                   |                        |  |  |  |  |  |  |  |               |   |    |   |    |      |                   |  |                      |   |    |   |    |      |                   |  |            |   |    |    |    |      |                   |  |                  |    |     |    |     |       |                   |  |                 |    |     |    |     |       |                   |  |                |    |     |    |    |       |                   |  |                   |  |     |  |     |       |                   |  |              |     |  |     |  |  |  |  |                                                                                                          |  |  |  |  |  |  |  |                                              |  |  |  |  |  |  |  |                  |  |  |  |  |  |  |  |             |   |    |    |    |      |                   |  |                   |  |    |  |    |      |                   |  |              |   |  |    |  |  |  |  |                               |  |  |  |  |  |  |  |                                                |  |  |  |  |  |  |  |                |  |     |  |     |        |                   |  |              |     |  |     |  |  |  |  |                                                                                                            |  |  |  |  |  |  |  |                                               |  |  |  |  |  |  |  |                                                                                                     |  |  |  |  |  |  |  |           |  |  |  |  |  |  |  |             |  |  |  |  |  |  |  |            |  |  |  |  |  |  |  |                                       |  |  |  |  |  |  |  |  |  |
| Daniels 2010 (2)                                                                                                                                                                                                                                                                                                                                                                                                                                                                                                                                                                                                                                                                                                                                                                                                                                                                                                                                                                                                                                                                                                                                                                                                                                                                                                                                                                                                                                                                                                                                                                                                                                                                                                                                                                                                                                                                                                                                                                                                                                                                                                                                                                                                                                                                                                                                                                                                                                                                                                                                                                                                                                                                                                                                                                                                                                                                                          | 50                    | 128                  | 65                | 137              | 22.8%  | 0.82 [0.62, 1.09]                 |                                   |                       |  |                   |                       |                      |                   |                  |        |                                   |                                   |                        |  |  |  |  |  |  |  |               |   |    |   |    |      |                   |  |                      |   |    |   |    |      |                   |  |            |   |    |    |    |      |                   |  |                  |    |     |    |     |       |                   |  |                 |    |     |    |     |       |                   |  |                |    |     |    |    |       |                   |  |                   |  |     |  |     |       |                   |  |              |     |  |     |  |  |  |  |                                                                                                          |  |  |  |  |  |  |  |                                              |  |  |  |  |  |  |  |                  |  |  |  |  |  |  |  |             |   |    |    |    |      |                   |  |                   |  |    |  |    |      |                   |  |              |   |  |    |  |  |  |  |                               |  |  |  |  |  |  |  |                                                |  |  |  |  |  |  |  |                |  |     |  |     |        |                   |  |              |     |  |     |  |  |  |  |                                                                                                            |  |  |  |  |  |  |  |                                               |  |  |  |  |  |  |  |                                                                                                     |  |  |  |  |  |  |  |           |  |  |  |  |  |  |  |             |  |  |  |  |  |  |  |            |  |  |  |  |  |  |  |                                       |  |  |  |  |  |  |  |  |  |
| Vermeersch 2019                                                                                                                                                                                                                                                                                                                                                                                                                                                                                                                                                                                                                                                                                                                                                                                                                                                                                                                                                                                                                                                                                                                                                                                                                                                                                                                                                                                                                                                                                                                                                                                                                                                                                                                                                                                                                                                                                                                                                                                                                                                                                                                                                                                                                                                                                                                                                                                                                                                                                                                                                                                                                                                                                                                                                                                                                                                                                           | 69                    | 147                  | 86                | 154              | 24.7%  | 0.84 [0.67, 1.05]                 |                                   |                       |  |                   |                       |                      |                   |                  |        |                                   |                                   |                        |  |  |  |  |  |  |  |               |   |    |   |    |      |                   |  |                      |   |    |   |    |      |                   |  |            |   |    |    |    |      |                   |  |                  |    |     |    |     |       |                   |  |                 |    |     |    |     |       |                   |  |                |    |     |    |    |       |                   |  |                   |  |     |  |     |       |                   |  |              |     |  |     |  |  |  |  |                                                                                                          |  |  |  |  |  |  |  |                                              |  |  |  |  |  |  |  |                  |  |  |  |  |  |  |  |             |   |    |    |    |      |                   |  |                   |  |    |  |    |      |                   |  |              |   |  |    |  |  |  |  |                               |  |  |  |  |  |  |  |                                                |  |  |  |  |  |  |  |                |  |     |  |     |        |                   |  |              |     |  |     |  |  |  |  |                                                                                                            |  |  |  |  |  |  |  |                                               |  |  |  |  |  |  |  |                                                                                                     |  |  |  |  |  |  |  |           |  |  |  |  |  |  |  |             |  |  |  |  |  |  |  |            |  |  |  |  |  |  |  |                                       |  |  |  |  |  |  |  |  |  |
| Pines 1972 (3)                                                                                                                                                                                                                                                                                                                                                                                                                                                                                                                                                                                                                                                                                                                                                                                                                                                                                                                                                                                                                                                                                                                                                                                                                                                                                                                                                                                                                                                                                                                                                                                                                                                                                                                                                                                                                                                                                                                                                                                                                                                                                                                                                                                                                                                                                                                                                                                                                                                                                                                                                                                                                                                                                                                                                                                                                                                                                            | 93                    | 160                  | 46                | 67               | 25.2%  | 0.85 [0.69, 1.04]                 |                                   |                       |  |                   |                       |                      |                   |                  |        |                                   |                                   |                        |  |  |  |  |  |  |  |               |   |    |   |    |      |                   |  |                      |   |    |   |    |      |                   |  |            |   |    |    |    |      |                   |  |                  |    |     |    |     |       |                   |  |                 |    |     |    |     |       |                   |  |                |    |     |    |    |       |                   |  |                   |  |     |  |     |       |                   |  |              |     |  |     |  |  |  |  |                                                                                                          |  |  |  |  |  |  |  |                                              |  |  |  |  |  |  |  |                  |  |  |  |  |  |  |  |             |   |    |    |    |      |                   |  |                   |  |    |  |    |      |                   |  |              |   |  |    |  |  |  |  |                               |  |  |  |  |  |  |  |                                                |  |  |  |  |  |  |  |                |  |     |  |     |        |                   |  |              |     |  |     |  |  |  |  |                                                                                                            |  |  |  |  |  |  |  |                                               |  |  |  |  |  |  |  |                                                                                                     |  |  |  |  |  |  |  |           |  |  |  |  |  |  |  |             |  |  |  |  |  |  |  |            |  |  |  |  |  |  |  |                                       |  |  |  |  |  |  |  |  |  |
| Subtotal (95% CI)                                                                                                                                                                                                                                                                                                                                                                                                                                                                                                                                                                                                                                                                                                                                                                                                                                                                                                                                                                                                                                                                                                                                                                                                                                                                                                                                                                                                                                                                                                                                                                                                                                                                                                                                                                                                                                                                                                                                                                                                                                                                                                                                                                                                                                                                                                                                                                                                                                                                                                                                                                                                                                                                                                                                                                                                                                                                                         |                       | 606                  |                   | 498              | 92.0%  | 0.80 [0.68, 0.95]                 |                                   |                       |  |                   |                       |                      |                   |                  |        |                                   |                                   |                        |  |  |  |  |  |  |  |               |   |    |   |    |      |                   |  |                      |   |    |   |    |      |                   |  |            |   |    |    |    |      |                   |  |                  |    |     |    |     |       |                   |  |                 |    |     |    |     |       |                   |  |                |    |     |    |    |       |                   |  |                   |  |     |  |     |       |                   |  |              |     |  |     |  |  |  |  |                                                                                                          |  |  |  |  |  |  |  |                                              |  |  |  |  |  |  |  |                  |  |  |  |  |  |  |  |             |   |    |    |    |      |                   |  |                   |  |    |  |    |      |                   |  |              |   |  |    |  |  |  |  |                               |  |  |  |  |  |  |  |                                                |  |  |  |  |  |  |  |                |  |     |  |     |        |                   |  |              |     |  |     |  |  |  |  |                                                                                                            |  |  |  |  |  |  |  |                                               |  |  |  |  |  |  |  |                                                                                                     |  |  |  |  |  |  |  |           |  |  |  |  |  |  |  |             |  |  |  |  |  |  |  |            |  |  |  |  |  |  |  |                                       |  |  |  |  |  |  |  |  |  |
| Total events                                                                                                                                                                                                                                                                                                                                                                                                                                                                                                                                                                                                                                                                                                                                                                                                                                                                                                                                                                                                                                                                                                                                                                                                                                                                                                                                                                                                                                                                                                                                                                                                                                                                                                                                                                                                                                                                                                                                                                                                                                                                                                                                                                                                                                                                                                                                                                                                                                                                                                                                                                                                                                                                                                                                                                                                                                                                                              | 227                   |                      | 219               |                  |        |                                   |                                   |                       |  |                   |                       |                      |                   |                  |        |                                   |                                   |                        |  |  |  |  |  |  |  |               |   |    |   |    |      |                   |  |                      |   |    |   |    |      |                   |  |            |   |    |    |    |      |                   |  |                  |    |     |    |     |       |                   |  |                 |    |     |    |     |       |                   |  |                |    |     |    |    |       |                   |  |                   |  |     |  |     |       |                   |  |              |     |  |     |  |  |  |  |                                                                                                          |  |  |  |  |  |  |  |                                              |  |  |  |  |  |  |  |                  |  |  |  |  |  |  |  |             |   |    |    |    |      |                   |  |                   |  |    |  |    |      |                   |  |              |   |  |    |  |  |  |  |                               |  |  |  |  |  |  |  |                                                |  |  |  |  |  |  |  |                |  |     |  |     |        |                   |  |              |     |  |     |  |  |  |  |                                                                                                            |  |  |  |  |  |  |  |                                               |  |  |  |  |  |  |  |                                                                                                     |  |  |  |  |  |  |  |           |  |  |  |  |  |  |  |             |  |  |  |  |  |  |  |            |  |  |  |  |  |  |  |                                       |  |  |  |  |  |  |  |  |  |
| Heterogeneity: Tau <sup>2</sup> = 0.01; Chi <sup>2</sup> = 6.64, df = 5 (P = 0.25); I <sup>2</sup> = 25%                                                                                                                                                                                                                                                                                                                                                                                                                                                                                                                                                                                                                                                                                                                                                                                                                                                                                                                                                                                                                                                                                                                                                                                                                                                                                                                                                                                                                                                                                                                                                                                                                                                                                                                                                                                                                                                                                                                                                                                                                                                                                                                                                                                                                                                                                                                                                                                                                                                                                                                                                                                                                                                                                                                                                                                                  |                       |                      |                   |                  |        |                                   |                                   |                       |  |                   |                       |                      |                   |                  |        |                                   |                                   |                        |  |  |  |  |  |  |  |               |   |    |   |    |      |                   |  |                      |   |    |   |    |      |                   |  |            |   |    |    |    |      |                   |  |                  |    |     |    |     |       |                   |  |                 |    |     |    |     |       |                   |  |                |    |     |    |    |       |                   |  |                   |  |     |  |     |       |                   |  |              |     |  |     |  |  |  |  |                                                                                                          |  |  |  |  |  |  |  |                                              |  |  |  |  |  |  |  |                  |  |  |  |  |  |  |  |             |   |    |    |    |      |                   |  |                   |  |    |  |    |      |                   |  |              |   |  |    |  |  |  |  |                               |  |  |  |  |  |  |  |                                                |  |  |  |  |  |  |  |                |  |     |  |     |        |                   |  |              |     |  |     |  |  |  |  |                                                                                                            |  |  |  |  |  |  |  |                                               |  |  |  |  |  |  |  |                                                                                                     |  |  |  |  |  |  |  |           |  |  |  |  |  |  |  |             |  |  |  |  |  |  |  |            |  |  |  |  |  |  |  |                                       |  |  |  |  |  |  |  |  |  |
| Test for overall effect: Z = 2.51 (P = 0.01)                                                                                                                                                                                                                                                                                                                                                                                                                                                                                                                                                                                                                                                                                                                                                                                                                                                                                                                                                                                                                                                                                                                                                                                                                                                                                                                                                                                                                                                                                                                                                                                                                                                                                                                                                                                                                                                                                                                                                                                                                                                                                                                                                                                                                                                                                                                                                                                                                                                                                                                                                                                                                                                                                                                                                                                                                                                              |                       |                      |                   |                  |        |                                   |                                   |                       |  |                   |                       |                      |                   |                  |        |                                   |                                   |                        |  |  |  |  |  |  |  |               |   |    |   |    |      |                   |  |                      |   |    |   |    |      |                   |  |            |   |    |    |    |      |                   |  |                  |    |     |    |     |       |                   |  |                 |    |     |    |     |       |                   |  |                |    |     |    |    |       |                   |  |                   |  |     |  |     |       |                   |  |              |     |  |     |  |  |  |  |                                                                                                          |  |  |  |  |  |  |  |                                              |  |  |  |  |  |  |  |                  |  |  |  |  |  |  |  |             |   |    |    |    |      |                   |  |                   |  |    |  |    |      |                   |  |              |   |  |    |  |  |  |  |                               |  |  |  |  |  |  |  |                                                |  |  |  |  |  |  |  |                |  |     |  |     |        |                   |  |              |     |  |     |  |  |  |  |                                                                                                            |  |  |  |  |  |  |  |                                               |  |  |  |  |  |  |  |                                                                                                     |  |  |  |  |  |  |  |           |  |  |  |  |  |  |  |             |  |  |  |  |  |  |  |            |  |  |  |  |  |  |  |                                       |  |  |  |  |  |  |  |  |  |
| <b>1.1.2 ICU</b>                                                                                                                                                                                                                                                                                                                                                                                                                                                                                                                                                                                                                                                                                                                                                                                                                                                                                                                                                                                                                                                                                                                                                                                                                                                                                                                                                                                                                                                                                                                                                                                                                                                                                                                                                                                                                                                                                                                                                                                                                                                                                                                                                                                                                                                                                                                                                                                                                                                                                                                                                                                                                                                                                                                                                                                                                                                                                          |                       |                      |                   |                  |        |                                   |                                   |                       |  |                   |                       |                      |                   |                  |        |                                   |                                   |                        |  |  |  |  |  |  |  |               |   |    |   |    |      |                   |  |                      |   |    |   |    |      |                   |  |            |   |    |    |    |      |                   |  |                  |    |     |    |     |       |                   |  |                 |    |     |    |     |       |                   |  |                |    |     |    |    |       |                   |  |                   |  |     |  |     |       |                   |  |              |     |  |     |  |  |  |  |                                                                                                          |  |  |  |  |  |  |  |                                              |  |  |  |  |  |  |  |                  |  |  |  |  |  |  |  |             |   |    |    |    |      |                   |  |                   |  |    |  |    |      |                   |  |              |   |  |    |  |  |  |  |                               |  |  |  |  |  |  |  |                                                |  |  |  |  |  |  |  |                |  |     |  |     |        |                   |  |              |     |  |     |  |  |  |  |                                                                                                            |  |  |  |  |  |  |  |                                               |  |  |  |  |  |  |  |                                                                                                     |  |  |  |  |  |  |  |           |  |  |  |  |  |  |  |             |  |  |  |  |  |  |  |            |  |  |  |  |  |  |  |                                       |  |  |  |  |  |  |  |  |  |
| Nouira 2001                                                                                                                                                                                                                                                                                                                                                                                                                                                                                                                                                                                                                                                                                                                                                                                                                                                                                                                                                                                                                                                                                                                                                                                                                                                                                                                                                                                                                                                                                                                                                                                                                                                                                                                                                                                                                                                                                                                                                                                                                                                                                                                                                                                                                                                                                                                                                                                                                                                                                                                                                                                                                                                                                                                                                                                                                                                                                               | 5                     | 47                   | 26                | 46               | 8.0%   | 0.19 [0.08, 0.45]                 |                                   |                       |  |                   |                       |                      |                   |                  |        |                                   |                                   |                        |  |  |  |  |  |  |  |               |   |    |   |    |      |                   |  |                      |   |    |   |    |      |                   |  |            |   |    |    |    |      |                   |  |                  |    |     |    |     |       |                   |  |                 |    |     |    |     |       |                   |  |                |    |     |    |    |       |                   |  |                   |  |     |  |     |       |                   |  |              |     |  |     |  |  |  |  |                                                                                                          |  |  |  |  |  |  |  |                                              |  |  |  |  |  |  |  |                  |  |  |  |  |  |  |  |             |   |    |    |    |      |                   |  |                   |  |    |  |    |      |                   |  |              |   |  |    |  |  |  |  |                               |  |  |  |  |  |  |  |                                                |  |  |  |  |  |  |  |                |  |     |  |     |        |                   |  |              |     |  |     |  |  |  |  |                                                                                                            |  |  |  |  |  |  |  |                                               |  |  |  |  |  |  |  |                                                                                                     |  |  |  |  |  |  |  |           |  |  |  |  |  |  |  |             |  |  |  |  |  |  |  |            |  |  |  |  |  |  |  |                                       |  |  |  |  |  |  |  |  |  |
| Subtotal (95% CI)                                                                                                                                                                                                                                                                                                                                                                                                                                                                                                                                                                                                                                                                                                                                                                                                                                                                                                                                                                                                                                                                                                                                                                                                                                                                                                                                                                                                                                                                                                                                                                                                                                                                                                                                                                                                                                                                                                                                                                                                                                                                                                                                                                                                                                                                                                                                                                                                                                                                                                                                                                                                                                                                                                                                                                                                                                                                                         |                       | 47                   |                   | 46               | 8.0%   | 0.19 [0.08, 0.45]                 |                                   |                       |  |                   |                       |                      |                   |                  |        |                                   |                                   |                        |  |  |  |  |  |  |  |               |   |    |   |    |      |                   |  |                      |   |    |   |    |      |                   |  |            |   |    |    |    |      |                   |  |                  |    |     |    |     |       |                   |  |                 |    |     |    |     |       |                   |  |                |    |     |    |    |       |                   |  |                   |  |     |  |     |       |                   |  |              |     |  |     |  |  |  |  |                                                                                                          |  |  |  |  |  |  |  |                                              |  |  |  |  |  |  |  |                  |  |  |  |  |  |  |  |             |   |    |    |    |      |                   |  |                   |  |    |  |    |      |                   |  |              |   |  |    |  |  |  |  |                               |  |  |  |  |  |  |  |                                                |  |  |  |  |  |  |  |                |  |     |  |     |        |                   |  |              |     |  |     |  |  |  |  |                                                                                                            |  |  |  |  |  |  |  |                                               |  |  |  |  |  |  |  |                                                                                                     |  |  |  |  |  |  |  |           |  |  |  |  |  |  |  |             |  |  |  |  |  |  |  |            |  |  |  |  |  |  |  |                                       |  |  |  |  |  |  |  |  |  |
| Total events                                                                                                                                                                                                                                                                                                                                                                                                                                                                                                                                                                                                                                                                                                                                                                                                                                                                                                                                                                                                                                                                                                                                                                                                                                                                                                                                                                                                                                                                                                                                                                                                                                                                                                                                                                                                                                                                                                                                                                                                                                                                                                                                                                                                                                                                                                                                                                                                                                                                                                                                                                                                                                                                                                                                                                                                                                                                                              | 5                     |                      | 26                |                  |        |                                   |                                   |                       |  |                   |                       |                      |                   |                  |        |                                   |                                   |                        |  |  |  |  |  |  |  |               |   |    |   |    |      |                   |  |                      |   |    |   |    |      |                   |  |            |   |    |    |    |      |                   |  |                  |    |     |    |     |       |                   |  |                 |    |     |    |     |       |                   |  |                |    |     |    |    |       |                   |  |                   |  |     |  |     |       |                   |  |              |     |  |     |  |  |  |  |                                                                                                          |  |  |  |  |  |  |  |                                              |  |  |  |  |  |  |  |                  |  |  |  |  |  |  |  |             |   |    |    |    |      |                   |  |                   |  |    |  |    |      |                   |  |              |   |  |    |  |  |  |  |                               |  |  |  |  |  |  |  |                                                |  |  |  |  |  |  |  |                |  |     |  |     |        |                   |  |              |     |  |     |  |  |  |  |                                                                                                            |  |  |  |  |  |  |  |                                               |  |  |  |  |  |  |  |                                                                                                     |  |  |  |  |  |  |  |           |  |  |  |  |  |  |  |             |  |  |  |  |  |  |  |            |  |  |  |  |  |  |  |                                       |  |  |  |  |  |  |  |  |  |
| Heterogeneity: Not applicable                                                                                                                                                                                                                                                                                                                                                                                                                                                                                                                                                                                                                                                                                                                                                                                                                                                                                                                                                                                                                                                                                                                                                                                                                                                                                                                                                                                                                                                                                                                                                                                                                                                                                                                                                                                                                                                                                                                                                                                                                                                                                                                                                                                                                                                                                                                                                                                                                                                                                                                                                                                                                                                                                                                                                                                                                                                                             |                       |                      |                   |                  |        |                                   |                                   |                       |  |                   |                       |                      |                   |                  |        |                                   |                                   |                        |  |  |  |  |  |  |  |               |   |    |   |    |      |                   |  |                      |   |    |   |    |      |                   |  |            |   |    |    |    |      |                   |  |                  |    |     |    |     |       |                   |  |                 |    |     |    |     |       |                   |  |                |    |     |    |    |       |                   |  |                   |  |     |  |     |       |                   |  |              |     |  |     |  |  |  |  |                                                                                                          |  |  |  |  |  |  |  |                                              |  |  |  |  |  |  |  |                  |  |  |  |  |  |  |  |             |   |    |    |    |      |                   |  |                   |  |    |  |    |      |                   |  |              |   |  |    |  |  |  |  |                               |  |  |  |  |  |  |  |                                                |  |  |  |  |  |  |  |                |  |     |  |     |        |                   |  |              |     |  |     |  |  |  |  |                                                                                                            |  |  |  |  |  |  |  |                                               |  |  |  |  |  |  |  |                                                                                                     |  |  |  |  |  |  |  |           |  |  |  |  |  |  |  |             |  |  |  |  |  |  |  |            |  |  |  |  |  |  |  |                                       |  |  |  |  |  |  |  |  |  |
| Test for overall effect: Z = 3.78 (P = 0.0002)                                                                                                                                                                                                                                                                                                                                                                                                                                                                                                                                                                                                                                                                                                                                                                                                                                                                                                                                                                                                                                                                                                                                                                                                                                                                                                                                                                                                                                                                                                                                                                                                                                                                                                                                                                                                                                                                                                                                                                                                                                                                                                                                                                                                                                                                                                                                                                                                                                                                                                                                                                                                                                                                                                                                                                                                                                                            |                       |                      |                   |                  |        |                                   |                                   |                       |  |                   |                       |                      |                   |                  |        |                                   |                                   |                        |  |  |  |  |  |  |  |               |   |    |   |    |      |                   |  |                      |   |    |   |    |      |                   |  |            |   |    |    |    |      |                   |  |                  |    |     |    |     |       |                   |  |                 |    |     |    |     |       |                   |  |                |    |     |    |    |       |                   |  |                   |  |     |  |     |       |                   |  |              |     |  |     |  |  |  |  |                                                                                                          |  |  |  |  |  |  |  |                                              |  |  |  |  |  |  |  |                  |  |  |  |  |  |  |  |             |   |    |    |    |      |                   |  |                   |  |    |  |    |      |                   |  |              |   |  |    |  |  |  |  |                               |  |  |  |  |  |  |  |                                                |  |  |  |  |  |  |  |                |  |     |  |     |        |                   |  |              |     |  |     |  |  |  |  |                                                                                                            |  |  |  |  |  |  |  |                                               |  |  |  |  |  |  |  |                                                                                                     |  |  |  |  |  |  |  |           |  |  |  |  |  |  |  |             |  |  |  |  |  |  |  |            |  |  |  |  |  |  |  |                                       |  |  |  |  |  |  |  |  |  |
| Total (95% CI)                                                                                                                                                                                                                                                                                                                                                                                                                                                                                                                                                                                                                                                                                                                                                                                                                                                                                                                                                                                                                                                                                                                                                                                                                                                                                                                                                                                                                                                                                                                                                                                                                                                                                                                                                                                                                                                                                                                                                                                                                                                                                                                                                                                                                                                                                                                                                                                                                                                                                                                                                                                                                                                                                                                                                                                                                                                                                            |                       | 653                  |                   | 544              | 100.0% | 0.68 [0.51, 0.91]                 |                                   |                       |  |                   |                       |                      |                   |                  |        |                                   |                                   |                        |  |  |  |  |  |  |  |               |   |    |   |    |      |                   |  |                      |   |    |   |    |      |                   |  |            |   |    |    |    |      |                   |  |                  |    |     |    |     |       |                   |  |                 |    |     |    |     |       |                   |  |                |    |     |    |    |       |                   |  |                   |  |     |  |     |       |                   |  |              |     |  |     |  |  |  |  |                                                                                                          |  |  |  |  |  |  |  |                                              |  |  |  |  |  |  |  |                  |  |  |  |  |  |  |  |             |   |    |    |    |      |                   |  |                   |  |    |  |    |      |                   |  |              |   |  |    |  |  |  |  |                               |  |  |  |  |  |  |  |                                                |  |  |  |  |  |  |  |                |  |     |  |     |        |                   |  |              |     |  |     |  |  |  |  |                                                                                                            |  |  |  |  |  |  |  |                                               |  |  |  |  |  |  |  |                                                                                                     |  |  |  |  |  |  |  |           |  |  |  |  |  |  |  |             |  |  |  |  |  |  |  |            |  |  |  |  |  |  |  |                                       |  |  |  |  |  |  |  |  |  |
| Total events                                                                                                                                                                                                                                                                                                                                                                                                                                                                                                                                                                                                                                                                                                                                                                                                                                                                                                                                                                                                                                                                                                                                                                                                                                                                                                                                                                                                                                                                                                                                                                                                                                                                                                                                                                                                                                                                                                                                                                                                                                                                                                                                                                                                                                                                                                                                                                                                                                                                                                                                                                                                                                                                                                                                                                                                                                                                                              | 232                   |                      | 245               |                  |        |                                   |                                   |                       |  |                   |                       |                      |                   |                  |        |                                   |                                   |                        |  |  |  |  |  |  |  |               |   |    |   |    |      |                   |  |                      |   |    |   |    |      |                   |  |            |   |    |    |    |      |                   |  |                  |    |     |    |     |       |                   |  |                 |    |     |    |     |       |                   |  |                |    |     |    |    |       |                   |  |                   |  |     |  |     |       |                   |  |              |     |  |     |  |  |  |  |                                                                                                          |  |  |  |  |  |  |  |                                              |  |  |  |  |  |  |  |                  |  |  |  |  |  |  |  |             |   |    |    |    |      |                   |  |                   |  |    |  |    |      |                   |  |              |   |  |    |  |  |  |  |                               |  |  |  |  |  |  |  |                                                |  |  |  |  |  |  |  |                |  |     |  |     |        |                   |  |              |     |  |     |  |  |  |  |                                                                                                            |  |  |  |  |  |  |  |                                               |  |  |  |  |  |  |  |                                                                                                     |  |  |  |  |  |  |  |           |  |  |  |  |  |  |  |             |  |  |  |  |  |  |  |            |  |  |  |  |  |  |  |                                       |  |  |  |  |  |  |  |  |  |
| Heterogeneity: Tau <sup>2</sup> = 0.08; Chi <sup>2</sup> = 18.20, df = 6 (P = 0.006); I <sup>2</sup> = 67%                                                                                                                                                                                                                                                                                                                                                                                                                                                                                                                                                                                                                                                                                                                                                                                                                                                                                                                                                                                                                                                                                                                                                                                                                                                                                                                                                                                                                                                                                                                                                                                                                                                                                                                                                                                                                                                                                                                                                                                                                                                                                                                                                                                                                                                                                                                                                                                                                                                                                                                                                                                                                                                                                                                                                                                                |                       |                      |                   |                  |        |                                   |                                   |                       |  |                   |                       |                      |                   |                  |        |                                   |                                   |                        |  |  |  |  |  |  |  |               |   |    |   |    |      |                   |  |                      |   |    |   |    |      |                   |  |            |   |    |    |    |      |                   |  |                  |    |     |    |     |       |                   |  |                 |    |     |    |     |       |                   |  |                |    |     |    |    |       |                   |  |                   |  |     |  |     |       |                   |  |              |     |  |     |  |  |  |  |                                                                                                          |  |  |  |  |  |  |  |                                              |  |  |  |  |  |  |  |                  |  |  |  |  |  |  |  |             |   |    |    |    |      |                   |  |                   |  |    |  |    |      |                   |  |              |   |  |    |  |  |  |  |                               |  |  |  |  |  |  |  |                                                |  |  |  |  |  |  |  |                |  |     |  |     |        |                   |  |              |     |  |     |  |  |  |  |                                                                                                            |  |  |  |  |  |  |  |                                               |  |  |  |  |  |  |  |                                                                                                     |  |  |  |  |  |  |  |           |  |  |  |  |  |  |  |             |  |  |  |  |  |  |  |            |  |  |  |  |  |  |  |                                       |  |  |  |  |  |  |  |  |  |
| Test for overall effect: Z = 2.61 (P = 0.009)                                                                                                                                                                                                                                                                                                                                                                                                                                                                                                                                                                                                                                                                                                                                                                                                                                                                                                                                                                                                                                                                                                                                                                                                                                                                                                                                                                                                                                                                                                                                                                                                                                                                                                                                                                                                                                                                                                                                                                                                                                                                                                                                                                                                                                                                                                                                                                                                                                                                                                                                                                                                                                                                                                                                                                                                                                                             |                       |                      |                   |                  |        |                                   |                                   |                       |  |                   |                       |                      |                   |                  |        |                                   |                                   |                        |  |  |  |  |  |  |  |               |   |    |   |    |      |                   |  |                      |   |    |   |    |      |                   |  |            |   |    |    |    |      |                   |  |                  |    |     |    |     |       |                   |  |                 |    |     |    |     |       |                   |  |                |    |     |    |    |       |                   |  |                   |  |     |  |     |       |                   |  |              |     |  |     |  |  |  |  |                                                                                                          |  |  |  |  |  |  |  |                                              |  |  |  |  |  |  |  |                  |  |  |  |  |  |  |  |             |   |    |    |    |      |                   |  |                   |  |    |  |    |      |                   |  |              |   |  |    |  |  |  |  |                               |  |  |  |  |  |  |  |                                                |  |  |  |  |  |  |  |                |  |     |  |     |        |                   |  |              |     |  |     |  |  |  |  |                                                                                                            |  |  |  |  |  |  |  |                                               |  |  |  |  |  |  |  |                                                                                                     |  |  |  |  |  |  |  |           |  |  |  |  |  |  |  |             |  |  |  |  |  |  |  |            |  |  |  |  |  |  |  |                                       |  |  |  |  |  |  |  |  |  |
| Test for subgroup differences: Chi <sup>2</sup> = 10.39, df = 1 (P = 0.001), I <sup>2</sup> = 90.4%                                                                                                                                                                                                                                                                                                                                                                                                                                                                                                                                                                                                                                                                                                                                                                                                                                                                                                                                                                                                                                                                                                                                                                                                                                                                                                                                                                                                                                                                                                                                                                                                                                                                                                                                                                                                                                                                                                                                                                                                                                                                                                                                                                                                                                                                                                                                                                                                                                                                                                                                                                                                                                                                                                                                                                                                       |                       |                      |                   |                  |        |                                   |                                   |                       |  |                   |                       |                      |                   |                  |        |                                   |                                   |                        |  |  |  |  |  |  |  |               |   |    |   |    |      |                   |  |                      |   |    |   |    |      |                   |  |            |   |    |    |    |      |                   |  |                  |    |     |    |     |       |                   |  |                 |    |     |    |     |       |                   |  |                |    |     |    |    |       |                   |  |                   |  |     |  |     |       |                   |  |              |     |  |     |  |  |  |  |                                                                                                          |  |  |  |  |  |  |  |                                              |  |  |  |  |  |  |  |                  |  |  |  |  |  |  |  |             |   |    |    |    |      |                   |  |                   |  |    |  |    |      |                   |  |              |   |  |    |  |  |  |  |                               |  |  |  |  |  |  |  |                                                |  |  |  |  |  |  |  |                |  |     |  |     |        |                   |  |              |     |  |     |  |  |  |  |                                                                                                            |  |  |  |  |  |  |  |                                               |  |  |  |  |  |  |  |                                                                                                     |  |  |  |  |  |  |  |           |  |  |  |  |  |  |  |             |  |  |  |  |  |  |  |            |  |  |  |  |  |  |  |                                       |  |  |  |  |  |  |  |  |  |
| Footnotes                                                                                                                                                                                                                                                                                                                                                                                                                                                                                                                                                                                                                                                                                                                                                                                                                                                                                                                                                                                                                                                                                                                                                                                                                                                                                                                                                                                                                                                                                                                                                                                                                                                                                                                                                                                                                                                                                                                                                                                                                                                                                                                                                                                                                                                                                                                                                                                                                                                                                                                                                                                                                                                                                                                                                                                                                                                                                                 |                       |                      |                   |                  |        |                                   |                                   |                       |  |                   |                       |                      |                   |                  |        |                                   |                                   |                        |  |  |  |  |  |  |  |               |   |    |   |    |      |                   |  |                      |   |    |   |    |      |                   |  |            |   |    |    |    |      |                   |  |                  |    |     |    |     |       |                   |  |                 |    |     |    |     |       |                   |  |                |    |     |    |    |       |                   |  |                   |  |     |  |     |       |                   |  |              |     |  |     |  |  |  |  |                                                                                                          |  |  |  |  |  |  |  |                                              |  |  |  |  |  |  |  |                  |  |  |  |  |  |  |  |             |   |    |    |    |      |                   |  |                   |  |    |  |    |      |                   |  |              |   |  |    |  |  |  |  |                               |  |  |  |  |  |  |  |                                                |  |  |  |  |  |  |  |                |  |     |  |     |        |                   |  |              |     |  |     |  |  |  |  |                                                                                                            |  |  |  |  |  |  |  |                                               |  |  |  |  |  |  |  |                                                                                                     |  |  |  |  |  |  |  |           |  |  |  |  |  |  |  |             |  |  |  |  |  |  |  |            |  |  |  |  |  |  |  |                                       |  |  |  |  |  |  |  |  |  |
| (1) 10 days                                                                                                                                                                                                                                                                                                                                                                                                                                                                                                                                                                                                                                                                                                                                                                                                                                                                                                                                                                                                                                                                                                                                                                                                                                                                                                                                                                                                                                                                                                                                                                                                                                                                                                                                                                                                                                                                                                                                                                                                                                                                                                                                                                                                                                                                                                                                                                                                                                                                                                                                                                                                                                                                                                                                                                                                                                                                                               |                       |                      |                   |                  |        |                                   |                                   |                       |  |                   |                       |                      |                   |                  |        |                                   |                                   |                        |  |  |  |  |  |  |  |               |   |    |   |    |      |                   |  |                      |   |    |   |    |      |                   |  |            |   |    |    |    |      |                   |  |                  |    |     |    |     |       |                   |  |                 |    |     |    |     |       |                   |  |                |    |     |    |    |       |                   |  |                   |  |     |  |     |       |                   |  |              |     |  |     |  |  |  |  |                                                                                                          |  |  |  |  |  |  |  |                                              |  |  |  |  |  |  |  |                  |  |  |  |  |  |  |  |             |   |    |    |    |      |                   |  |                   |  |    |  |    |      |                   |  |              |   |  |    |  |  |  |  |                               |  |  |  |  |  |  |  |                                                |  |  |  |  |  |  |  |                |  |     |  |     |        |                   |  |              |     |  |     |  |  |  |  |                                                                                                            |  |  |  |  |  |  |  |                                               |  |  |  |  |  |  |  |                                                                                                     |  |  |  |  |  |  |  |           |  |  |  |  |  |  |  |             |  |  |  |  |  |  |  |            |  |  |  |  |  |  |  |                                       |  |  |  |  |  |  |  |  |  |
| (2) day 30                                                                                                                                                                                                                                                                                                                                                                                                                                                                                                                                                                                                                                                                                                                                                                                                                                                                                                                                                                                                                                                                                                                                                                                                                                                                                                                                                                                                                                                                                                                                                                                                                                                                                                                                                                                                                                                                                                                                                                                                                                                                                                                                                                                                                                                                                                                                                                                                                                                                                                                                                                                                                                                                                                                                                                                                                                                                                                |                       |                      |                   |                  |        |                                   |                                   |                       |  |                   |                       |                      |                   |                  |        |                                   |                                   |                        |  |  |  |  |  |  |  |               |   |    |   |    |      |                   |  |                      |   |    |   |    |      |                   |  |            |   |    |    |    |      |                   |  |                  |    |     |    |     |       |                   |  |                 |    |     |    |     |       |                   |  |                |    |     |    |    |       |                   |  |                   |  |     |  |     |       |                   |  |              |     |  |     |  |  |  |  |                                                                                                          |  |  |  |  |  |  |  |                                              |  |  |  |  |  |  |  |                  |  |  |  |  |  |  |  |             |   |    |    |    |      |                   |  |                   |  |    |  |    |      |                   |  |              |   |  |    |  |  |  |  |                               |  |  |  |  |  |  |  |                                                |  |  |  |  |  |  |  |                |  |     |  |     |        |                   |  |              |     |  |     |  |  |  |  |                                                                                                            |  |  |  |  |  |  |  |                                               |  |  |  |  |  |  |  |                                                                                                     |  |  |  |  |  |  |  |           |  |  |  |  |  |  |  |             |  |  |  |  |  |  |  |            |  |  |  |  |  |  |  |                                       |  |  |  |  |  |  |  |  |  |
| (3) additional antibiotics (day 7-28)                                                                                                                                                                                                                                                                                                                                                                                                                                                                                                                                                                                                                                                                                                                                                                                                                                                                                                                                                                                                                                                                                                                                                                                                                                                                                                                                                                                                                                                                                                                                                                                                                                                                                                                                                                                                                                                                                                                                                                                                                                                                                                                                                                                                                                                                                                                                                                                                                                                                                                                                                                                                                                                                                                                                                                                                                                                                     |                       |                      |                   |                  |        |                                   |                                   |                       |  |                   |                       |                      |                   |                  |        |                                   |                                   |                        |  |  |  |  |  |  |  |               |   |    |   |    |      |                   |  |                      |   |    |   |    |      |                   |  |            |   |    |    |    |      |                   |  |                  |    |     |    |     |       |                   |  |                 |    |     |    |     |       |                   |  |                |    |     |    |    |       |                   |  |                   |  |     |  |     |       |                   |  |              |     |  |     |  |  |  |  |                                                                                                          |  |  |  |  |  |  |  |                                              |  |  |  |  |  |  |  |                  |  |  |  |  |  |  |  |             |   |    |    |    |      |                   |  |                   |  |    |  |    |      |                   |  |              |   |  |    |  |  |  |  |                               |  |  |  |  |  |  |  |                                                |  |  |  |  |  |  |  |                |  |     |  |     |        |                   |  |              |     |  |     |  |  |  |  |                                                                                                            |  |  |  |  |  |  |  |                                               |  |  |  |  |  |  |  |                                                                                                     |  |  |  |  |  |  |  |           |  |  |  |  |  |  |  |             |  |  |  |  |  |  |  |            |  |  |  |  |  |  |  |                                       |  |  |  |  |  |  |  |  |  |
| Mortalidad por cualquier causa                                                                                                                                                                                                                                                                                                                                                                                                                                                                                                                                                                                                                                                                                                                                                                                                                                                                                                                                                                                                                                                                                                                                                                                                                                                                                                                                                                                                                                                                                                                                                                                                                                                                                                                                                                                                                                                                                                                                                                                                                                                                                                                                                                                                                                                                                                                                                                                                                                                                                                                                                                                                                                                                                                                                                                                                                                                                            |                       |                      |                   |                  |        |                                   |                                   |                       |  |                   |                       |                      |                   |                  |        |                                   |                                   |                        |  |  |  |  |  |  |  |               |   |    |   |    |      |                   |  |                      |   |    |   |    |      |                   |  |            |   |    |    |    |      |                   |  |                  |    |     |    |     |       |                   |  |                 |    |     |    |     |       |                   |  |                |    |     |    |    |       |                   |  |                   |  |     |  |     |       |                   |  |              |     |  |     |  |  |  |  |                                                                                                          |  |  |  |  |  |  |  |                                              |  |  |  |  |  |  |  |                  |  |  |  |  |  |  |  |             |   |    |    |    |      |                   |  |                   |  |    |  |    |      |                   |  |              |   |  |    |  |  |  |  |                               |  |  |  |  |  |  |  |                                                |  |  |  |  |  |  |  |                |  |     |  |     |        |                   |  |              |     |  |     |  |  |  |  |                                                                                                            |  |  |  |  |  |  |  |                                               |  |  |  |  |  |  |  |                                                                                                     |  |  |  |  |  |  |  |           |  |  |  |  |  |  |  |             |  |  |  |  |  |  |  |            |  |  |  |  |  |  |  |                                       |  |  |  |  |  |  |  |  |  |
| Pacientes hospitalarios:<br>El análisis conjunto de 3 ECAs (715 pacientes) no muestra una diferencia significativa entre el tratamiento con antibióticos y el placebo: OR 1.45 (0.66 a 3.17); 13 más por 1000 (de 10 menos a 59 más).                                                                                                                                                                                                                                                                                                                                                                                                                                                                                                                                                                                                                                                                                                                                                                                                                                                                                                                                                                                                                                                                                                                                                                                                                                                                                                                                                                                                                                                                                                                                                                                                                                                                                                                                                                                                                                                                                                                                                                                                                                                                                                                                                                                                                                                                                                                                                                                                                                                                                                                                                                                                                                                                     |                       |                      |                   |                  |        |                                   |                                   | Calidad moderada-baja |  |                   |                       |                      |                   |                  |        |                                   |                                   |                        |  |  |  |  |  |  |  |               |   |    |   |    |      |                   |  |                      |   |    |   |    |      |                   |  |            |   |    |    |    |      |                   |  |                  |    |     |    |     |       |                   |  |                 |    |     |    |     |       |                   |  |                |    |     |    |    |       |                   |  |                   |  |     |  |     |       |                   |  |              |     |  |     |  |  |  |  |                                                                                                          |  |  |  |  |  |  |  |                                              |  |  |  |  |  |  |  |                  |  |  |  |  |  |  |  |             |   |    |    |    |      |                   |  |                   |  |    |  |    |      |                   |  |              |   |  |    |  |  |  |  |                               |  |  |  |  |  |  |  |                                                |  |  |  |  |  |  |  |                |  |     |  |     |        |                   |  |              |     |  |     |  |  |  |  |                                                                                                            |  |  |  |  |  |  |  |                                               |  |  |  |  |  |  |  |                                                                                                     |  |  |  |  |  |  |  |           |  |  |  |  |  |  |  |             |  |  |  |  |  |  |  |            |  |  |  |  |  |  |  |                                       |  |  |  |  |  |  |  |  |  |
| La confianza con los resultados es baja (ver tabla de resumen de resultados).                                                                                                                                                                                                                                                                                                                                                                                                                                                                                                                                                                                                                                                                                                                                                                                                                                                                                                                                                                                                                                                                                                                                                                                                                                                                                                                                                                                                                                                                                                                                                                                                                                                                                                                                                                                                                                                                                                                                                                                                                                                                                                                                                                                                                                                                                                                                                                                                                                                                                                                                                                                                                                                                                                                                                                                                                             |                       |                      |                   |                  |        |                                   |                                   |                       |  |                   |                       |                      |                   |                  |        |                                   |                                   |                        |  |  |  |  |  |  |  |               |   |    |   |    |      |                   |  |                      |   |    |   |    |      |                   |  |            |   |    |    |    |      |                   |  |                  |    |     |    |     |       |                   |  |                 |    |     |    |     |       |                   |  |                |    |     |    |    |       |                   |  |                   |  |     |  |     |       |                   |  |              |     |  |     |  |  |  |  |                                                                                                          |  |  |  |  |  |  |  |                                              |  |  |  |  |  |  |  |                  |  |  |  |  |  |  |  |             |   |    |    |    |      |                   |  |                   |  |    |  |    |      |                   |  |              |   |  |    |  |  |  |  |                               |  |  |  |  |  |  |  |                                                |  |  |  |  |  |  |  |                |  |     |  |     |        |                   |  |              |     |  |     |  |  |  |  |                                                                                                            |  |  |  |  |  |  |  |                                               |  |  |  |  |  |  |  |                                                                                                     |  |  |  |  |  |  |  |           |  |  |  |  |  |  |  |             |  |  |  |  |  |  |  |            |  |  |  |  |  |  |  |                                       |  |  |  |  |  |  |  |  |  |
| Pacientes UCI:<br>Un ECA (93 pacientes críticos) muestra una reducción significativa de la mortalidad asociada al tratamiento con ofloxacino respecto a placebo: OR 0.21 (0.06 a 0.72); 162 menos por 1000 (de 201 menos a 51 menos).                                                                                                                                                                                                                                                                                                                                                                                                                                                                                                                                                                                                                                                                                                                                                                                                                                                                                                                                                                                                                                                                                                                                                                                                                                                                                                                                                                                                                                                                                                                                                                                                                                                                                                                                                                                                                                                                                                                                                                                                                                                                                                                                                                                                                                                                                                                                                                                                                                                                                                                                                                                                                                                                     |                       |                      |                   |                  |        |                                   |                                   |                       |  |                   |                       |                      |                   |                  |        |                                   |                                   |                        |  |  |  |  |  |  |  |               |   |    |   |    |      |                   |  |                      |   |    |   |    |      |                   |  |            |   |    |    |    |      |                   |  |                  |    |     |    |     |       |                   |  |                 |    |     |    |     |       |                   |  |                |    |     |    |    |       |                   |  |                   |  |     |  |     |       |                   |  |              |     |  |     |  |  |  |  |                                                                                                          |  |  |  |  |  |  |  |                                              |  |  |  |  |  |  |  |                  |  |  |  |  |  |  |  |             |   |    |    |    |      |                   |  |                   |  |    |  |    |      |                   |  |              |   |  |    |  |  |  |  |                               |  |  |  |  |  |  |  |                                                |  |  |  |  |  |  |  |                |  |     |  |     |        |                   |  |              |     |  |     |  |  |  |  |                                                                                                            |  |  |  |  |  |  |  |                                               |  |  |  |  |  |  |  |                                                                                                     |  |  |  |  |  |  |  |           |  |  |  |  |  |  |  |             |  |  |  |  |  |  |  |            |  |  |  |  |  |  |  |                                       |  |  |  |  |  |  |  |  |  |
| La confianza con los resultados es moderada (ver tabla de resumen de resultados).                                                                                                                                                                                                                                                                                                                                                                                                                                                                                                                                                                                                                                                                                                                                                                                                                                                                                                                                                                                                                                                                                                                                                                                                                                                                                                                                                                                                                                                                                                                                                                                                                                                                                                                                                                                                                                                                                                                                                                                                                                                                                                                                                                                                                                                                                                                                                                                                                                                                                                                                                                                                                                                                                                                                                                                                                         |                       |                      |                   |                  |        |                                   |                                   |                       |  |                   |                       |                      |                   |                  |        |                                   |                                   |                        |  |  |  |  |  |  |  |               |   |    |   |    |      |                   |  |                      |   |    |   |    |      |                   |  |            |   |    |    |    |      |                   |  |                  |    |     |    |     |       |                   |  |                 |    |     |    |     |       |                   |  |                |    |     |    |    |       |                   |  |                   |  |     |  |     |       |                   |  |              |     |  |     |  |  |  |  |                                                                                                          |  |  |  |  |  |  |  |                                              |  |  |  |  |  |  |  |                  |  |  |  |  |  |  |  |             |   |    |    |    |      |                   |  |                   |  |    |  |    |      |                   |  |              |   |  |    |  |  |  |  |                               |  |  |  |  |  |  |  |                                                |  |  |  |  |  |  |  |                |  |     |  |     |        |                   |  |              |     |  |     |  |  |  |  |                                                                                                            |  |  |  |  |  |  |  |                                               |  |  |  |  |  |  |  |                                                                                                     |  |  |  |  |  |  |  |           |  |  |  |  |  |  |  |             |  |  |  |  |  |  |  |            |  |  |  |  |  |  |  |                                       |  |  |  |  |  |  |  |  |  |

|                                                                                                                                                                                                                                                                                                                                                                                                                                                                                                                                                                                                                                                                                                                                                                                                                                                                                                                                                                                                                                                                                                                                                                                                                                                                                                                                                                                                                                                                                         |  |                                     |  |
|-----------------------------------------------------------------------------------------------------------------------------------------------------------------------------------------------------------------------------------------------------------------------------------------------------------------------------------------------------------------------------------------------------------------------------------------------------------------------------------------------------------------------------------------------------------------------------------------------------------------------------------------------------------------------------------------------------------------------------------------------------------------------------------------------------------------------------------------------------------------------------------------------------------------------------------------------------------------------------------------------------------------------------------------------------------------------------------------------------------------------------------------------------------------------------------------------------------------------------------------------------------------------------------------------------------------------------------------------------------------------------------------------------------------------------------------------------------------------------------------|--|-------------------------------------|--|
| <p><b>Study or Subgroup</b></p> <p><b>Antibiotics</b></p> <p>Events Total</p> <p><b>Placebo</b></p> <p>Events Total</p> <p><b>Weight</b></p> <p><b>Peto Odds Ratio</b></p> <p>Peto, Fixed, 95% CI</p> <p><b>Peto Odds Ratio</b></p> <p>Peto, Fixed, 95% CI</p> <p><b>1.3.1 Inpatients</b></p> <p>Vermeersch 2019 3 147 6 154 24.5% 0.53 [0.14, 1.99]</p> <p>Wang 2016 5 95 2 96 19.0% 2.45 [0.54, 11.04]</p> <p>Daniels 2010 7 107 3 116 26.8% 2.51 [0.71, 8.90]</p> <p>Subtotal (95% CI) 349 366 70.4% 1.45 [0.66, 3.17]</p> <p>Total events 15 11</p> <p>Heterogeneity: <math>\chi^2 = 3.41</math>, <math>df = 2</math> (<math>P = 0.18</math>); <math>I^2 = 41\%</math></p> <p>Test for overall effect: <math>Z = 0.93</math> (<math>P = 0.35</math>)</p> <p><b>1.3.2 ICU patients</b></p> <p>Nouira 2001 2 47 10 46 29.6% 0.21 [0.06, 0.72]</p> <p>Subtotal (95% CI) 47 46 29.6% 0.21 [0.06, 0.72]</p> <p>Total events 2 10</p> <p>Heterogeneity: Not applicable</p> <p>Test for overall effect: <math>Z = 2.50</math> (<math>P = 0.01</math>)</p> <p>Total (95% CI) 396 412 100.0% 0.82 [0.43, 1.59]</p> <p>Total events 17 21</p> <p>Heterogeneity: <math>\chi^2 = 10.19</math>, <math>df = 3</math> (<math>P = 0.02</math>); <math>I^2 = 71\%</math></p> <p>Test for overall effect: <math>Z = 0.58</math> (<math>P = 0.56</math>)</p> <p>Test for subgroup differences: <math>\chi^2 = 6.78</math>, <math>df = 1</math> (<math>P = 0.009</math>), <math>I^2 = 85.2\%</math></p> |  |                                     |  |
| <p><b>Duración estancia hospitalaria</b></p> <p><b>Pacientes hospitalarios:</b></p> <p>Un total de 4 ECAs (601 pacientes) no muestran diferencias significativas entre el tratamiento con antibióticos y el placebo: MD 0.53 menos (2.26 menos a 1.19 más).</p> <p>La confianza con los resultados es baja (ver tabla de resumen de resultados).</p> <p><b>Pacientes UCI:</b></p> <p>Un ECA (93 pacientes críticos) muestra una reducción significativa del tratamiento con ofloxacino respecto a placebo: MD 9.6 menos (12.84 menos a 6.36 menos).</p> <p>La confianza con los resultados es moderada (ver tabla de resumen de resultados).</p>                                                                                                                                                                                                                                                                                                                                                                                                                                                                                                                                                                                                                                                                                                                                                                                                                                        |  | <p><b>Calidad moderada-baja</b></p> |  |
| <p><b>Study or Subgroup</b></p> <p><b>Antibiotics</b></p> <p>Mean SD Total</p> <p><b>Placebo</b></p> <p>Mean SD Total</p> <p><b>Weight</b></p> <p><b>Mean Difference</b></p> <p>IV, Random, 95% CI</p> <p><b>Mean Difference</b></p> <p>IV, Random, 95% CI</p> <p><b>1.2.1 Inpatients</b></p> <p>Manresa 1987 12.8 4 11 12.3 4 8 14.3% 0.50 [-3.14, 4.14]</p> <p>Vermeersch 2019 10.7 8.5886 147 14 10.6786 154 24.2% -3.30 [-5.48, -1.12]</p> <p>Wang 2016 10.9 8.1 95 9.9 5.1 96 26.6% 1.00 [-0.92, 2.92]</p> <p>Alonso Martínez 1992 7.9 2.1 61 8.1 2.4 29 34.9% -0.20 [-1.22, 0.82]</p> <p>Subtotal (95% CI) 314 287 100.0% -0.53 [-2.26, 1.19]</p> <p>Heterogeneity: <math>\tau^2 = 1.95</math>; <math>\chi^2 = 9.19</math>, <math>df = 3</math> (<math>P = 0.03</math>); <math>I^2 = 67\%</math></p> <p>Test for overall effect: <math>Z = 0.61</math> (<math>P = 0.55</math>)</p> <p><b>1.2.2 ICU</b></p> <p>Nouira 2001 14.9 7.4 47 24.5 8.5 46 100.0% -9.60 [-12.84, -6.36]</p> <p>Subtotal (95% CI) 47 46 100.0% -9.60 [-12.84, -6.36]</p> <p>Heterogeneity: Not applicable</p> <p>Test for overall effect: <math>Z = 5.80</math> (<math>P &lt; 0.00001</math>)</p> <p>Test for subgroup differences: <math>\chi^2 = 23.43</math>, <math>df = 1</math> (<math>P &lt; 0.00001</math>), <math>I^2 = 95.7\%</math></p>                                                                                                                                                           |  |                                     |  |
| <p><b>Frecuencia de agudizaciones</b></p> <p>Dos ECA en pacientes hospitalizados aportan resultados de este desenlace. Los resultados se describen por separado al no ser posible el meta-análisis de los resultados.</p> <p>Un estudio que incluyó 194 pacientes no mostró diferencias significativas entre el tratamiento con antibióticos y placebo respecto al número de pacientes con agudización (RR 1,56; IC95% de 0,77 a 3,16). Un segundo estudio con 301 pacientes no mostró diferencias significativas respecto al tiempo a la primera agudización (HR 0,7; IC95% de 0,49 a 1,0).</p> <p>La confianza con los resultados es baja (ver tabla de resumen de resultados).</p>                                                                                                                                                                                                                                                                                                                                                                                                                                                                                                                                                                                                                                                                                                                                                                                                   |  | <p><b>Calidad moderada</b></p>      |  |
| <p><b>Disnea</b></p>                                                                                                                                                                                                                                                                                                                                                                                                                                                                                                                                                                                                                                                                                                                                                                                                                                                                                                                                                                                                                                                                                                                                                                                                                                                                                                                                                                                                                                                                    |  |                                     |  |

| <p>En uno de los ECAs seleccionados se reporta datos (265 pacientes) sobre disnea (evaluada como una escala de VAS de 0 a 10) sin diferencias significativas entre los grupos (doxiciclina y el placebo): MD 0.6 menos (1.27 menos a 0.07 más).</p> <p>La confianza con los resultados es baja (ver tabla de resumen de resultados).</p> <table><tr><th rowspan="2">Study or Subgroup</th><th colspan="3">Antibiotics</th><th colspan="3">Placebo</th><th colspan="2">Mean Difference</th><th colspan="2">Mean Difference</th></tr><tr><th>Mean</th><th>SD</th><th>Total</th><th>Mean</th><th>SD</th><th>Total</th><th colspan="2">IV, Fixed, 95% CI</th><th colspan="2">IV, Fixed, 95% CI</th></tr><tr><td>Daniels 2010</td><td>-2.4</td><td>2.8</td><td>128</td><td>-1.8</td><td>2.8</td><td>137</td><td colspan="2">-0.60 [-1.27, 0.07]</td><td colspan="2"></td></tr></table> | Study or Subgroup | Antibiotics |       |      | Placebo |       |                     | Mean Difference |                         | Mean Difference |  | Mean | SD | Total | Mean | SD | Total | IV, Fixed, 95% CI |  | IV, Fixed, 95% CI |  | Daniels 2010 | -2.4 | 2.8 | 128 | -1.8 | 2.8 | 137 | -0.60 [-1.27, 0.07] |  |  |  | <b>Calidad moderada</b> |
|-----------------------------------------------------------------------------------------------------------------------------------------------------------------------------------------------------------------------------------------------------------------------------------------------------------------------------------------------------------------------------------------------------------------------------------------------------------------------------------------------------------------------------------------------------------------------------------------------------------------------------------------------------------------------------------------------------------------------------------------------------------------------------------------------------------------------------------------------------------------------------------|-------------------|-------------|-------|------|---------|-------|---------------------|-----------------|-------------------------|-----------------|--|------|----|-------|------|----|-------|-------------------|--|-------------------|--|--------------|------|-----|-----|------|-----|-----|---------------------|--|--|--|-------------------------|
| Study or Subgroup                                                                                                                                                                                                                                                                                                                                                                                                                                                                                                                                                                                                                                                                                                                                                                                                                                                                 |                   | Antibiotics |       |      | Placebo |       |                     | Mean Difference |                         | Mean Difference |  |      |    |       |      |    |       |                   |  |                   |  |              |      |     |     |      |     |     |                     |  |  |  |                         |
|                                                                                                                                                                                                                                                                                                                                                                                                                                                                                                                                                                                                                                                                                                                                                                                                                                                                                   | Mean              | SD          | Total | Mean | SD      | Total | IV, Fixed, 95% CI   |                 | IV, Fixed, 95% CI       |                 |  |      |    |       |      |    |       |                   |  |                   |  |              |      |     |     |      |     |     |                     |  |  |  |                         |
| Daniels 2010                                                                                                                                                                                                                                                                                                                                                                                                                                                                                                                                                                                                                                                                                                                                                                                                                                                                      | -2.4              | 2.8         | 128   | -1.8 | 2.8     | 137   | -0.60 [-1.27, 0.07] |                 |                         |                 |  |      |    |       |      |    |       |                   |  |                   |  |              |      |     |     |      |     |     |                     |  |  |  |                         |
| <b>PACIENTES AMBULATORIOS Y HOSPITALARIOS: ANTIBIÓTICOS vs PLACEBO</b>                                                                                                                                                                                                                                                                                                                                                                                                                                                                                                                                                                                                                                                                                                                                                                                                            |                   |             |       |      |         |       |                     |                 |                         |                 |  |      |    |       |      |    |       |                   |  |                   |  |              |      |     |     |      |     |     |                     |  |  |  |                         |
| <b>Efectos indeseables: diarrea</b>                                                                                                                                                                                                                                                                                                                                                                                                                                                                                                                                                                                                                                                                                                                                                                                                                                               |                   |             |       |      |         |       |                     |                 |                         |                 |  |      |    |       |      |    |       |                   |  |                   |  |              |      |     |     |      |     |     |                     |  |  |  |                         |
| <p>Un total de 6 ECAs (1400 pacientes y 80 eventos) muestran un aumento del número de pacientes que presentó diarrea en el grupo que recibió antibióticos [6,8% frente a 4,6%; Peto OR=1.58 (1.00 a 2.50); 25 más por 1000 (de 0 menos a 61 más)].</p> <p>La confianza con los resultados es baja (ver tabla de resumen de resultados).</p>                                                                                                                                                                                                                                                                                                                                                                                                                                                                                                                                       |                   |             |       |      |         |       |                     |                 | <b>Calidad moderada</b> |                 |  |      |    |       |      |    |       |                   |  |                   |  |              |      |     |     |      |     |     |                     |  |  |  |                         |
| <b>Cualquier efecto indeseable</b>                                                                                                                                                                                                                                                                                                                                                                                                                                                                                                                                                                                                                                                                                                                                                                                                                                                |                   |             |       |      |         |       |                     |                 |                         |                 |  |      |    |       |      |    |       |                   |  |                   |  |              |      |     |     |      |     |     |                     |  |  |  |                         |
| <p>Un total de 6 ECAs (1544 pacientes y 212 eventos) muestran un aumento de los efectos indeseados en el grupo que recibió antibióticos respecto a placebo: 1.20 (0.89 a 1.63); 22 más por 1000 (de 13 menos a 65 más).</p> <p>La confianza con los resultados es baja (ver tabla de resumen de resultados).</p> <p>En la siguiente figura se reportan otros efectos indeseables observados en los estudios incluidos.</p>                                                                                                                                                                                                                                                                                                                                                                                                                                                        |                   |             |       |      |         |       |                     |                 | <b>Calidad moderada</b> |                 |  |      |    |       |      |    |       |                   |  |                   |  |              |      |     |     |      |     |     |                     |  |  |  |                         |



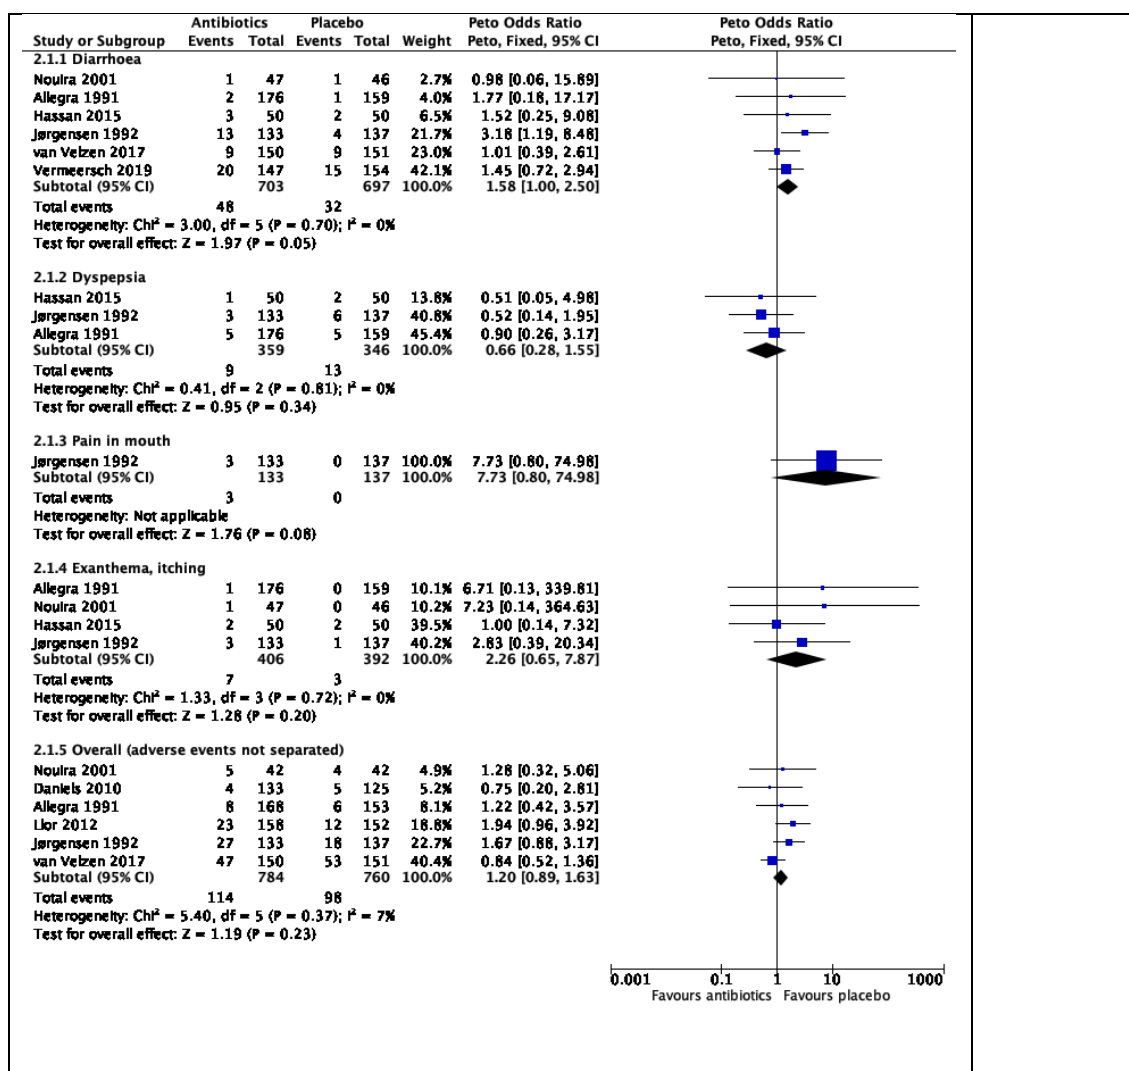

## Balance entre beneficios y riesgos

### En pacientes ambulatorios:

El uso de antibióticos se asocia a una reducción de la tasa de fracasos terapéuticos, sin afectar a la calidad de vida relacionada con la salud, las recurrencias o la mortalidad. Muchas agudizaciones tratadas con placebo no se asocian con fracaso terapéutico, lo que sugiere que el antibiótico no es siempre necesario.

### En pacientes ingresados:

El uso de antibióticos se asocia a una reducción de la tasa de fracasos terapéuticos, sin reducir la duración de la estancia hospitalaria o la mortalidad.

### En pacientes ingresados en UCI:

El uso de antibióticos se asocia a una reducción significativa de la mortalidad por cualquier causa, a un menor fracaso terapéutico y una menor duración de la estancia hospitalaria.

## Calidad global de la evidencia

El grupo elaborador de la guía consideró el fracaso terapéutico y la mortalidad como desenlaces críticos para la toma de decisiones. Los otros desenlaces se consideraron importantes, pero no críticos para la toma de decisiones.

La confianza global con los resultados en pacientes EPOC ambulatorios fue BAJA principalmente debido a la variabilidad e imprecisión de los resultados.



|                                                                                                                                                                                                                                                                                                                                                                                                                                                                                                                                                                                                                                                                                                                                                                                                                                                               |  |
|---------------------------------------------------------------------------------------------------------------------------------------------------------------------------------------------------------------------------------------------------------------------------------------------------------------------------------------------------------------------------------------------------------------------------------------------------------------------------------------------------------------------------------------------------------------------------------------------------------------------------------------------------------------------------------------------------------------------------------------------------------------------------------------------------------------------------------------------------------------|--|
| <p>La confianza global con los resultados en pacientes EPOC hospitalizados fue BAJA principalmente debido a la variabilidad e imprecisión de los resultados.</p> <p>La confianza global con los resultados en pacientes EPOC ingresados en una UCI fue MODERADA principalmente debido a la imprecisión de los resultados.</p>                                                                                                                                                                                                                                                                                                                                                                                                                                                                                                                                 |  |
| <b>Uso de recursos y costes</b>                                                                                                                                                                                                                                                                                                                                                                                                                                                                                                                                                                                                                                                                                                                                                                                                                               |  |
| <p>Se encontró una evaluación económica relevante (301 pacientes ambulatorios, 2 años de seguimiento).</p> <p>En el análisis de coste utilidad, el tratamiento con doxiciclina no muestra una diferencia significativa en el valor del estado de salud (QALY) respecto a placebo: MD 0.03 (-0.00 a 0.07).</p> <p>En el análisis de coste beneficio, el tratamiento con doxiciclina no muestra una diferencia significativa en el coste total desde la perspectiva social y sistema de salud respecto a placebo: 898 € (-2617 a 4409) y 328 € (-2791 a 4409), respectivamente. Aunque la tendencia es a un mayor coste en los pacientes tratados con antibióticos. Debido a que no se realizó una búsqueda formal de la literatura se ha realizado una descripción narrativa de este estudio. La confianza en los resultados es baja debido a imprecisión.</p> |  |
| <b>Recomendaciones</b>                                                                                                                                                                                                                                                                                                                                                                                                                                                                                                                                                                                                                                                                                                                                                                                                                                        |  |
| <p><b>En pacientes ambulatorios:</b><br/>En los pacientes que presentan una agudización ambulatoria de la EPOC se sugiere el uso de antibióticos (recomendación débil, calidad de evidencia baja).</p> <p><b>En pacientes ingresados:</b><br/>En los pacientes que presentan una agudización de la EPOC y requieren ingreso hospitalario se sugiere el uso de antibióticos (recomendación débil, calidad de evidencia baja).</p> <p><b>En pacientes ingresados en UCI:</b><br/>Se recomienda el uso de antibióticos en todos los pacientes que presentan una agudización de la EPOC y requieren ingreso en UCI (recomendación fuerte, calidad de evidencia moderada)</p>                                                                                                                                                                                      |  |
| <b>Especificaciones</b>                                                                                                                                                                                                                                                                                                                                                                                                                                                                                                                                                                                                                                                                                                                                                                                                                                       |  |
| <p>Muchas de las agudizaciones tratadas con placebo no se asocian con fracaso terapéutico, lo que sugiere que el antibiótico no siempre es necesario.</p> <p>El cambio en el color del esputo (de mucoso a oscuro) se asocia con mayor aislamiento de gérmenes potencialmente patógenos por lo que se considera un parámetro útil para decidir la administración de antibióticos.</p> <p>Los pacientes que precisan soporte ventilatorio tienen mayor riesgo de infección bacteriana. En estas circunstancias se aconseja el empleo de antibióticos.</p>                                                                                                                                                                                                                                                                                                      |  |

Pregunta: ANTIBIÓTICOS vs PLACEBO en agudizaciones de EPOC; PACIENTES AMBULATORIOS

| Certainty assessment                       |                    |                 |                    |                     |                        |                       | Nº de pacientes                                                                                                                                                                                                                                                                  |                 | Efecto                 |                                                                                            | Certainty                                                                                  | Importancia |
|--------------------------------------------|--------------------|-----------------|--------------------|---------------------|------------------------|-----------------------|----------------------------------------------------------------------------------------------------------------------------------------------------------------------------------------------------------------------------------------------------------------------------------|-----------------|------------------------|--------------------------------------------------------------------------------------------|--------------------------------------------------------------------------------------------|-------------|
| Nº de estudios                             | Diseño de estudio  | Riesgo de sesgo | Inconsistencia     | Evidencia indirecta | Imprecisión            | Otras consideraciones | Antibiotics                                                                                                                                                                                                                                                                      | placebo         | Relativo (95% CI)      | Absoluto (95% CI)                                                                          |                                                                                            |             |
| Fracaso terapéutico                        |                    |                 |                    |                     |                        |                       |                                                                                                                                                                                                                                                                                  |                 |                        |                                                                                            |                                                                                            |             |
| 7                                          | ensayos aleatorios | no es serio     | serio <sup>a</sup> | no es serio         | serio <sup>b</sup>     | ninguno               | 128/605 (21.2%)                                                                                                                                                                                                                                                                  | 173/586 (29.5%) | RR 0.72 (0.56 a 0.94)  | 83 menos por 1,000 (de 130 menos a 18 menos )                                              |  BAJA   | CRÍTICO     |
| Mortalidad por cualquier causa             |                    |                 |                    |                     |                        |                       |                                                                                                                                                                                                                                                                                  |                 |                        |                                                                                            |                                                                                            |             |
| 1                                          | ensayos aleatorios | no es serio     | no es serio        | no es serio         | muy serio <sup>c</sup> | ninguno               | 10/150 (6.7%)                                                                                                                                                                                                                                                                    | 8/151 (5.3%)    | OR 1.27 (0.49 a 3.30)  | 13 más por 1,000 (de 26 menos a 103 más )                                                  |  BAJA   | CRÍTICO     |
| Frecuencia de exacerbaciones/agudizaciones |                    |                 |                    |                     |                        |                       |                                                                                                                                                                                                                                                                                  |                 |                        |                                                                                            |                                                                                            |             |
| 1                                          | ensayos aleatorios | no es serio     | no es serio        | no es serio         | muy serio <sup>c</sup> | ninguno               | 2/18 (11.1%)                                                                                                                                                                                                                                                                     | 1/17 (5.9%)     | RR 1.89 (0.19 a 18.97) | 52 más por 1,000 (de 48 menos a 1,000 más )                                                |  BAJA   | IMPORTANTE  |
| Tiempo hasta la siguiente exacerbación     |                    |                 |                    |                     |                        |                       |                                                                                                                                                                                                                                                                                  |                 |                        |                                                                                            |                                                                                            |             |
| 2                                          | ensayos aleatorios | no es serio     | serio <sup>d</sup> | no es serio         | serio <sup>e</sup>     | ninguno               | Resultados de dos estudios:<br>mediana 233 días (IQR 110 a 365 días) con antibióticos vs. 160 días (IQR 66 a 365 días) con placebo ( <i>P</i> =0.015).<br>mediana 148 días (IQR 95 a 200 días) con antibióticos vs. 161 días (IQR 118 a 211 días) con placebo ( <i>P</i> =0.91). |                 |                        |  BAJA | IMPORTANTE                                                                                 |             |
| Calidad de vida                            |                    |                 |                    |                     |                        |                       |                                                                                                                                                                                                                                                                                  |                 |                        |                                                                                            |                                                                                            |             |
| 1                                          | ensayos aleatorios | no es serio     | no es serio        | no es serio         | muy serio <sup>f</sup> | ninguno               | 18                                                                                                                                                                                                                                                                               | 17              | -                      | MD 0 (1.79 menos a 1.79 más )                                                              |  BAJA | IMPORTANTE  |
| Disnea                                     |                    |                 |                    |                     |                        |                       |                                                                                                                                                                                                                                                                                  |                 |                        |                                                                                            |                                                                                            |             |
| 1                                          | ensayos aleatorios | no es serio     | no es serio        | no es serio         | muy serio <sup>f</sup> | ninguno               | 18                                                                                                                                                                                                                                                                               | 17              | -                      | MD 0 (0.97 menos a 0.97 más )                                                              |  BAJA | IMPORTANTE  |

| Certainty assessment |                    |                 |                |                     |             |                       | № de pacientes |         | Efecto            |                                          | Certainty                                                                                | Importancia |
|----------------------|--------------------|-----------------|----------------|---------------------|-------------|-----------------------|----------------|---------|-------------------|------------------------------------------|------------------------------------------------------------------------------------------|-------------|
| № de estudios        | Diseño de estudio  | Riesgo de sesgo | Inconsistencia | Evidencia indirecta | Imprecisión | Otras consideraciones | Antibiotics    | placebo | Relativo (95% CI) | Absoluto (95% CI)                        |                                                                                          |             |
| Días de baja         |                    |                 |                |                     |             |                       |                |         |                   |                                          |                                                                                          |             |
| 1                    | ensayos aleatorios | no es serio     | no es serio    | Muy serio 9         | no es serio | ninguno               | 42             | 46      | -                 | MD 5.18 menos (6.08 menos a 4.28 menos ) |  BAJA | IMPORTANTE  |

CI: Intervalo de confianza; RR: Razón de riesgo; OR: Odds ratio; MD: Diferencia media

### Explicaciones

- a. Variabilidad significativa en los resultados de los diferentes estudios
- b. Resultados imprecisos que no excluyen una reducción clínicamente no relevante
- c. Número de eventos muy escaso, los resultados pueden incluir un efecto importante favorable o perjudicial.
- d. Dos estudios con resultados inconsistentes.
- e. No ha sido posible analizar conjuntamente los resultados de dos estudios que muestran un beneficio relevante o no diferencias
- f. El resultado incluye un probable efecto beneficioso o perjudicial
- g. Desenlace subrogado de otros desenlaces clínicamente relevantes; el estudio aporta resultados del año 1957 con un antibiótico actualmente en desuso.

Pregunta: ANTIBIÓTICOS vs PLACEBO en agudizaciones de EPOC; PACIENTES HOSPITALARIOS

| Certainty assessment                                                  |                    |                 |                    |                     |                    |                       | Nº de pacientes |                 | Efecto                   |                                                    | Certainty                                                                                        | Importancia |
|-----------------------------------------------------------------------|--------------------|-----------------|--------------------|---------------------|--------------------|-----------------------|-----------------|-----------------|--------------------------|----------------------------------------------------|--------------------------------------------------------------------------------------------------|-------------|
| Nº de estudios                                                        | Diseño de estudio  | Riesgo de sesgo | Inconsistencia     | Evidencia indirecta | Imprecisión        | Otras consideraciones | Antibiotics     | placebo         | Relativo (95% CI)        | Absoluto (95% CI)                                  |                                                                                                  |             |
| Fracaso terapéutico - pacientes hospitalarios                         |                    |                 |                    |                     |                    |                       |                 |                 |                          |                                                    |                                                                                                  |             |
| 6                                                                     | ensayos aleatorios | no es serio     | no es serio        | no es serio         | serio <sup>a</sup> | ninguno               | 227/606 (37.5%) | 219/498 (44.0%) | RR 0.80<br>(0.68 a 0.95) | 88 menos por 1,000<br>(de 141 menos a 22 menos )   | <br>MODERADA  | CRÍTICO     |
| Fracaso terapéutico - pacientes en UCI                                |                    |                 |                    |                     |                    |                       |                 |                 |                          |                                                    |                                                                                                  |             |
| 1                                                                     | ensayos aleatorios | no es serio     | no es serio        | no es serio         | serio <sup>b</sup> | ninguno               | 5/47 (10.6%)    | 26/46 (56.5%)   | RR 0.19<br>(0.08 a 0.45) | 458 menos por 1,000<br>(de 520 menos a 311 menos ) | <br>MODERADA  | CRÍTICO     |
| Mortalidad por cualquier causa - pacientes hospitalarios              |                    |                 |                    |                     |                    |                       |                 |                 |                          |                                                    |                                                                                                  |             |
| 3                                                                     | ensayos aleatorios | no es serio     | serio <sup>c</sup> | no es serio         | serio <sup>d</sup> | ninguno               | 15/349 (4.3%)   | 11/366 (3.0%)   | OR 1.45<br>(0.66 a 3.17) | 13 más por 1,000<br>(de 10 menos a 59 más )        | <br>BAJA      | CRÍTICO     |
| Mortalidad por cualquier causa - pacientes en UCI                     |                    |                 |                    |                     |                    |                       |                 |                 |                          |                                                    |                                                                                                  |             |
| 1                                                                     | ensayos aleatorios | no es serio     | no es serio        | no es serio         | serio <sup>b</sup> | ninguno               | 2/47 (4.3%)     | 10/46 (21.7%)   | OR 0.21<br>(0.06 a 0.72) | 162 menos por 1,000<br>(de 201 menos a 51 menos )  | <br>MODERADA | CRÍTICO     |
| Duración de la estancia hospitalaria (días) - pacientes hospitalarios |                    |                 |                    |                     |                    |                       |                 |                 |                          |                                                    |                                                                                                  |             |
| 4                                                                     | ensayos aleatorios | no es serio     | serio <sup>c</sup> | no es serio         | serio <sup>a</sup> | ninguno               | 314             | 287             | -                        | MD 0.53 menos<br>(2.26 menos a 1.19 más )          | <br>BAJA    | IMPORTANTE  |

Duración de la estancia hospitalaria (días) - pacientes en ICU

| Certainty assessment                       |                    |                 |                    |                     |                    |                       | Nº de pacientes                                                                                                                                                                                                                                                                                                                                         |         | Efecto            |                                          | Certainty        | Importancia |
|--------------------------------------------|--------------------|-----------------|--------------------|---------------------|--------------------|-----------------------|---------------------------------------------------------------------------------------------------------------------------------------------------------------------------------------------------------------------------------------------------------------------------------------------------------------------------------------------------------|---------|-------------------|------------------------------------------|------------------|-------------|
| Nº de estudios                             | Diseño de estudio  | Riesgo de sesgo | Inconsistencia     | Evidencia indirecta | Imprecisión        | Otras consideraciones | Antibiotics                                                                                                                                                                                                                                                                                                                                             | placebo | Relativo (95% CI) | Absoluto (95% CI)                        |                  |             |
| 1                                          | ensayos aleatorios | no es serio     | no es serio        | no es serio         | serio <sup>a</sup> | ninguno               | 47                                                                                                                                                                                                                                                                                                                                                      | 46      | -                 | MD 9.6 menos (12.84 menos a 6.36 menos ) | ⊕⊕⊕○<br>MODERADA | IMPORTANTE  |
| Frecuencia de exacerbaciones/agudizaciones |                    |                 |                    |                     |                    |                       |                                                                                                                                                                                                                                                                                                                                                         |         |                   |                                          |                  |             |
| 2                                          | ensayos aleatorios | no es serio     | serio <sup>c</sup> | no es serio         | no es serio        | ninguno               | Un estudio que incluyó 194 pacientes no mostró diferencias significativas entre el tratamiento con antibióticos y placebo (RR 1,56; IC95% de 0,77 a 3,16)<br>Un estudio reciente que incluyó 301 pacientes muestra una reducción en la tasa de nuevas exacerbaciones entre los dos grupos, al margen de la significación (HR 0,7; IC95% de 0,49 a 1,0). |         |                   |                                          | ⊕⊕⊕○<br>MODERADA | IMPORTANTE  |
| Disnea                                     |                    |                 |                    |                     |                    |                       |                                                                                                                                                                                                                                                                                                                                                         |         |                   |                                          |                  |             |
| 1                                          | ensayos aleatorios | no es serio     | no es serio        | no es serio         | serio <sup>a</sup> | ninguno               | 128                                                                                                                                                                                                                                                                                                                                                     | 137     | -                 | MD 0.6 menos (1.27 menos a 0.07 más )    | ⊕⊕⊕○<br>MODERADA | IMPORTANTE  |

CI: Intervalo de confianza ; RR: Razón de riesgo; MD: Diferencia media; OR: Odds ratio

Explicaciones

- a. El límite superior del IC 95% de los efectos absolutos no excluye un efecto clínicamente no relevante
- b. Aunque el tamaño del efecto es grande, el número de eventos es muy escaso
- c. Variabilidad importante de los resultados entre los distintos estudios
- d. Número escaso de eventos; los límites superior e inferior del IC95% incluyen un efecto beneficioso o perjudicial clínicamente relevante

Pregunta: ANTIBIÓTICOS vs PLACEBO en agudizaciones de EPOC; PACIENTES AMBULATORIOS Y HOSPITALARIOS

| Certainty assessment          |                    |                 |                |                     |                    |                       | Nº de pacientes |                | Efecto                   |                                             | Certainty                                                                                       | Importancia |
|-------------------------------|--------------------|-----------------|----------------|---------------------|--------------------|-----------------------|-----------------|----------------|--------------------------|---------------------------------------------|-------------------------------------------------------------------------------------------------|-------------|
| Nº de estudios                | Diseño de estudio  | Riesgo de sesgo | Inconsistencia | Evidencia indirecta | Imprecisión        | Otras consideraciones | Antibiotics     | placebo        | Relativo (95% CI)        | Absoluto (95% CI)                           |                                                                                                 |             |
| Efectos indeseables – diarrea |                    |                 |                |                     |                    |                       |                 |                |                          |                                             |                                                                                                 |             |
| 6                             | ensayos aleatorios | no es serio     | no es serio    | no es serio         | serio <sup>a</sup> | ninguno               | 48/703 (6.8%)   | 32/697 (4.6%)  | OR 1.58<br>(1.00 a 2.50) | 25 más por 1,000<br>(de 0 menos a 61 más )  | <br>MODERADA | IMPORTANTE  |
| Cualquier efecto indeseable   |                    |                 |                |                     |                    |                       |                 |                |                          |                                             |                                                                                                 |             |
| 6                             | ensayos aleatorios | no es serio     | no es serio    | no es serio         | serio <sup>b</sup> | ninguno               | 114/784 (14.5%) | 98/760 (12.9%) | OR 1.20<br>(0.89 a 1.63) | 22 más por 1,000<br>(de 13 menos a 65 más ) | <br>MODERADA | IMPORTANTE  |

CI: Intervalo de confianza; OR: Odds Ratio

Explicaciones

a. El límite inferior del IC95% no descarta el efecto nulo  
b. Los límites del IC95% incluyen un efecto beneficioso o perjudicial

## PREGUNTA 2

|                                                                                                                                                                                                                                                                                                                                                                                                                                                                                                                                                                                                                                                                                                                                                                                                                                                                                                                                                                                                                                                                                                                                                                                                                                                                                                                                                                                                                                                                                                                                                                                                                                                          |                                |
|----------------------------------------------------------------------------------------------------------------------------------------------------------------------------------------------------------------------------------------------------------------------------------------------------------------------------------------------------------------------------------------------------------------------------------------------------------------------------------------------------------------------------------------------------------------------------------------------------------------------------------------------------------------------------------------------------------------------------------------------------------------------------------------------------------------------------------------------------------------------------------------------------------------------------------------------------------------------------------------------------------------------------------------------------------------------------------------------------------------------------------------------------------------------------------------------------------------------------------------------------------------------------------------------------------------------------------------------------------------------------------------------------------------------------------------------------------------------------------------------------------------------------------------------------------------------------------------------------------------------------------------------------------|--------------------------------|
| <p><b>Pregunta para responder:</b><br/> <b>¿La presencia de un cambio en el color del esputo, es útil para guiar la administración de antibióticos en los pacientes con una agudización de la EPOC?</b></p>                                                                                                                                                                                                                                                                                                                                                                                                                                                                                                                                                                                                                                                                                                                                                                                                                                                                                                                                                                                                                                                                                                                                                                                                                                                                                                                                                                                                                                              |                                |
| <p>No se identificó ningún ensayo clínico aleatorizado que respondiera directamente a la pregunta de interés.</p> <p>Se identificó una revisión sistemática (RS) que evalúa el valor predictivo de la determinación subjetiva del cambio en el color del esputo para identificar la presencia de bacterias potencialmente patógenas en el cultivo de esputo (Chen 2020).</p> <p>Aunque la RS aporta resultados sobre un desenlace subrogado (predicción de positividad del esputo), se decidió incluir esta RS y analizar los desenlaces relevantes evaluados en los estudios identificados en esta revisión.</p> <p>La RS de Chen 2020 incluyó 6 estudios observacionales. No se identificó ningún estudio adicional entre la lista de referencias excluidas en la RS de Chen 2020 o en una actualización de la búsqueda hasta la fecha.</p> <p>Todos los estudios incluyeron pacientes con síntomas compatibles con una agudización de la EPOC atendidos en un servicio de urgencias (de atención primaria u hospitalaria). La evaluación de la purulencia del esputo fue subjetiva por parte del clínico (en base a una escala de color) o auto reportada por el paciente en base a un cambio a una coloración amarilla-verdosa. Las bacterias potencialmente patógenas identificadas fueron heterogéneas, así como los criterios y métodos de cultivo utilizados.</p> <p>Dos estudios (Soler 2012, Stockley 2000) aportaron información sobre desenlaces clínicos de interés, además del valor predictivo a partir del seguimiento clínico de los pacientes tras recibir tratamiento antibiótico según el resultado de la evaluación del esputo.</p> |                                |
| <p><b>Estudios incluidos:</b></p> <ol style="list-style-type: none"> <li>1. Chen K, Pleasants KA, Pleasants RA, Beiko T, Washburn RG, Yu Z, Zhai S, Drummond MB. A Systematic Review and Meta-Analysis of Sputum Purulence to Predict Bacterial Infection in COPD Exacerbations. COPD. 2020 Jun;17(3):311-317.</li> <li>2. Allegra L, Blasi F, Diano P, et al. Sputum color as a marker of acute bacterial exacerbations of chronic obstructive pulmonary disease. Respir Med. 2005;99(6):742–747.</li> <li>3. Daniels JM, de Graaff CS, Vlasploder F, et al. Sputum colour reported by patients is not a reliable marker of the presence of bacteria in acute exacerbations of chronic obstructive pulmonary disease. Clin Microbiol Infect. 2010;16(6):583–588.</li> <li>4. Soler N, Agusti C, Angrill J, et al. Bronchoscopic validation of the significance of sputum purulence in severe exacerbations of chronic obstructive pulmonary disease. Thorax. 2007;62(1):29–35.</li> <li>5. Soler N, Esperatti M, Ewig S, et al. Sputum purulence-guided antibiotic use in hospitalised patients with exacerbations of COPD. Eur Respir J. 2012;40(6):1344–1353.</li> <li>6. Stockley RA, O'Brien C, Pye A, et al. Relationship of sputum color to nature and outpatient management of acute exacerbations of COPD. Chest. 2000;117(6):1638–1645.</li> <li>7. Tsimogianni AM, Papiris SA, Kanavaki S, et al. Predictors of positive sputum cultures in exacerbations of chronic obstructive pulmonary disease. Respirology. 2009;14(8):1114–1120.</li> </ol>                                                                                             |                                |
| <p><b>Asociación entre cambio de color del esputo (valoración subjetiva) e identificación de bacterias potencialmente patógenas</b></p>                                                                                                                                                                                                                                                                                                                                                                                                                                                                                                                                                                                                                                                                                                                                                                                                                                                                                                                                                                                                                                                                                                                                                                                                                                                                                                                                                                                                                                                                                                                  |                                |
| <p>Se han identificado un total de 6 estudios observacionales que analizó un total de 1092 muestras de esputo.</p>                                                                                                                                                                                                                                                                                                                                                                                                                                                                                                                                                                                                                                                                                                                                                                                                                                                                                                                                                                                                                                                                                                                                                                                                                                                                                                                                                                                                                                                                                                                                       | <p><b>Calidad muy baja</b></p> |



Los resultados muestran una relación significativa entre un esputo purulento y la identificación de bacterias potencialmente patógenas. En comparación a un esputo de aspecto mucoso, un esputo purulento tiene más probabilidades de presentar un cultivo positivo: RR=2.14, IC95% de 1.25 a 3.67

Estos resultados representan los datos crudos sin ajustar. Sólo un estudio (Tsimogianni 2002) presentó los resultados ajustados por factores de riesgo. En este estudio la purulencia del esputo se asoció a un cultivo positivo de forma significativa; OR= 3.403, IC95% de 1.233 a 9.389

La confianza de los resultados es baja debido a las limitaciones de los estudios incluidos, la variabilidad de los resultados y los resultados indirectos.

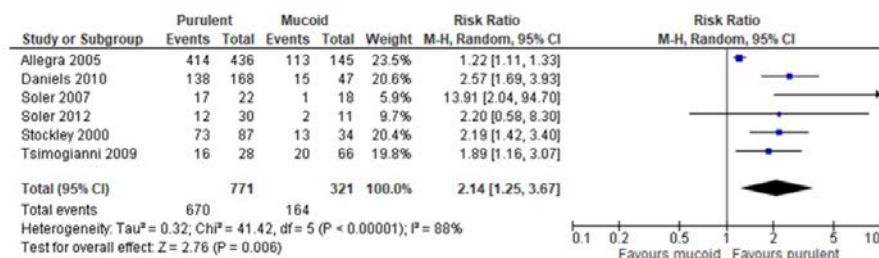

### Curación clínica (resolución completa de los síntomas)

Se han identificado un total de 2 estudios observacionales (Soler 2012, Stockley 2000). De forma general la presencia de un esputo de aspecto purulento se asoció a un menor porcentaje de resolución completa de los síntomas. Los resultados fueron variables según se considere el análisis por riesgos relativos u odds ratio (OR=0.35 IC95% de 0.15 a 0.81; RR= 0.79 IC95% de 0.46 a 1.35).

El estudio de Soler 2012 no mostró diferencias significativas de mejoría clínica entre los dos tipos de esputo a día 3 o día 30 de seguimiento, mostrando mejoría clínica en más del 90% de los casos en cualquier grupo.

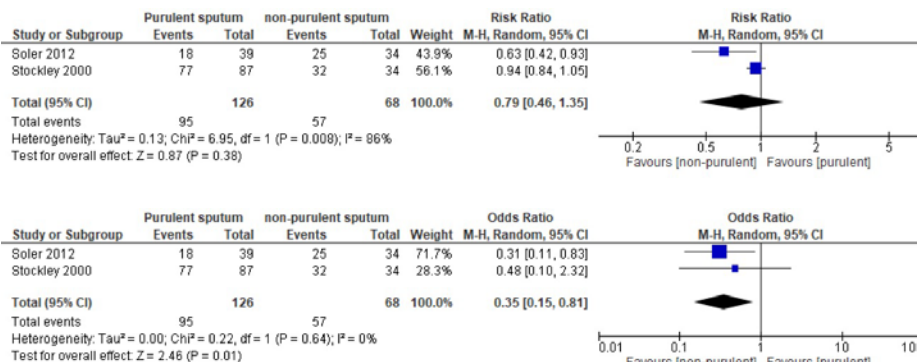

**Calidad muy baja**

### Mortalidad

Se identificó un solo estudio observacional que evaluó 73 pacientes (Soler 2012). No se observan diferencias entre los tipos de esputo respecto a la mortalidad aunque el número de eventos es muy escaso (2 en los pacientes con esputo purulento; 1 en los pacientes con esputo mucoso) (RR= 1.74, IC95% de 0.17 a 18.39)

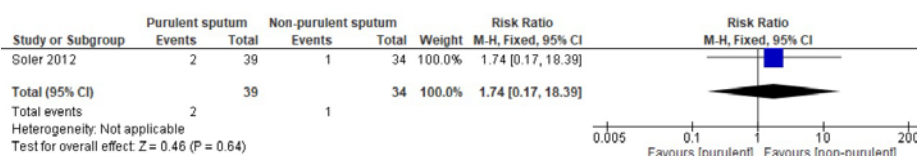

**Calidad muy baja**

### Recaídas (nuevas agudizaciones)

| <p>Se identificó un solo estudio observacional que evaluó 73 pacientes (Soler 2012). No se observan diferencias entre los tipos de esputo respecto a la recurrencia de exacerbación a los 30 días aunque el número de eventos es muy escaso (8 en los pacientes con esputo purulento; 7 en los pacientes con esputo mucoide) (RR= 1.00, IC95% de 0.40 a 2.46)</p>                                                                                                                                                                                                                                                                                                                                                                                                                                                   | <p><b>Calidad muy baja</b></p> |                 |        |                     |                     |                    |                    |                     |                 |                 |        |       |                    |                    |            |       |                    |                    |            |        |                   |    |                |   |    |        |                     |        |                   |  |              |    |  |   |    |        |                     |  |                               |  |  |  |  |  |  |  |                                              |  |                                              |  |  |  |  |  |  |  |  |  |  |
|---------------------------------------------------------------------------------------------------------------------------------------------------------------------------------------------------------------------------------------------------------------------------------------------------------------------------------------------------------------------------------------------------------------------------------------------------------------------------------------------------------------------------------------------------------------------------------------------------------------------------------------------------------------------------------------------------------------------------------------------------------------------------------------------------------------------|--------------------------------|-----------------|--------|---------------------|---------------------|--------------------|--------------------|---------------------|-----------------|-----------------|--------|-------|--------------------|--------------------|------------|-------|--------------------|--------------------|------------|--------|-------------------|----|----------------|---|----|--------|---------------------|--------|-------------------|--|--------------|----|--|---|----|--------|---------------------|--|-------------------------------|--|--|--|--|--|--|--|----------------------------------------------|--|----------------------------------------------|--|--|--|--|--|--|--|--|--|--|
| <table><tr><th rowspan="2">Study or Subgroup</th><th colspan="2">Purulent sputum</th><th colspan="2">Non-purulent sputum</th><th rowspan="2">Weight</th><th colspan="2">Risk Ratio</th></tr><tr><th>Events</th><th>Total</th><th>Events</th><th>Total</th><th>M-H, Fixed, 95% CI</th><th>M-H, Fixed, 95% CI</th></tr><tr><td>Soler 2012</td><td>8</td><td>39</td><td>7</td><td>34</td><td>100.0%</td><td>1.00 [0.40, 2.46]</td><td></td></tr><tr><td>Total (95% CI)</td><td></td><td>39</td><td></td><td>34</td><td>100.0%</td><td>1.00 [0.40, 2.46]</td><td></td></tr><tr><td>Total events</td><td>8</td><td></td><td>7</td><td></td><td></td><td></td><td></td></tr><tr><td colspan="8">Heterogeneity: Not applicable</td></tr><tr><td colspan="8">Test for overall effect: Z = 0.01 (P = 0.99)</td></tr></table> | Study or Subgroup              | Purulent sputum |        | Non-purulent sputum |                     | Weight             | Risk Ratio         |                     | Events          | Total           | Events | Total | M-H, Fixed, 95% CI | M-H, Fixed, 95% CI | Soler 2012 | 8     | 39                 | 7                  | 34         | 100.0% | 1.00 [0.40, 2.46] |    | Total (95% CI) |   | 39 |        | 34                  | 100.0% | 1.00 [0.40, 2.46] |  | Total events | 8  |  | 7 |    |        |                     |  | Heterogeneity: Not applicable |  |  |  |  |  |  |  | Test for overall effect: Z = 0.01 (P = 0.99) |  |                                              |  |  |  |  |  |  |  |  |  |  |
| Study or Subgroup                                                                                                                                                                                                                                                                                                                                                                                                                                                                                                                                                                                                                                                                                                                                                                                                   |                                | Purulent sputum |        | Non-purulent sputum |                     |                    | Weight             | Risk Ratio          |                 |                 |        |       |                    |                    |            |       |                    |                    |            |        |                   |    |                |   |    |        |                     |        |                   |  |              |    |  |   |    |        |                     |  |                               |  |  |  |  |  |  |  |                                              |  |                                              |  |  |  |  |  |  |  |  |  |  |
|                                                                                                                                                                                                                                                                                                                                                                                                                                                                                                                                                                                                                                                                                                                                                                                                                     | Events                         | Total           | Events | Total               | M-H, Fixed, 95% CI  | M-H, Fixed, 95% CI |                    |                     |                 |                 |        |       |                    |                    |            |       |                    |                    |            |        |                   |    |                |   |    |        |                     |        |                   |  |              |    |  |   |    |        |                     |  |                               |  |  |  |  |  |  |  |                                              |  |                                              |  |  |  |  |  |  |  |  |  |  |
| Soler 2012                                                                                                                                                                                                                                                                                                                                                                                                                                                                                                                                                                                                                                                                                                                                                                                                          | 8                              | 39              | 7      | 34                  | 100.0%              | 1.00 [0.40, 2.46]  |                    |                     |                 |                 |        |       |                    |                    |            |       |                    |                    |            |        |                   |    |                |   |    |        |                     |        |                   |  |              |    |  |   |    |        |                     |  |                               |  |  |  |  |  |  |  |                                              |  |                                              |  |  |  |  |  |  |  |  |  |  |
| Total (95% CI)                                                                                                                                                                                                                                                                                                                                                                                                                                                                                                                                                                                                                                                                                                                                                                                                      |                                | 39              |        | 34                  | 100.0%              | 1.00 [0.40, 2.46]  |                    |                     |                 |                 |        |       |                    |                    |            |       |                    |                    |            |        |                   |    |                |   |    |        |                     |        |                   |  |              |    |  |   |    |        |                     |  |                               |  |  |  |  |  |  |  |                                              |  |                                              |  |  |  |  |  |  |  |  |  |  |
| Total events                                                                                                                                                                                                                                                                                                                                                                                                                                                                                                                                                                                                                                                                                                                                                                                                        | 8                              |                 | 7      |                     |                     |                    |                    |                     |                 |                 |        |       |                    |                    |            |       |                    |                    |            |        |                   |    |                |   |    |        |                     |        |                   |  |              |    |  |   |    |        |                     |  |                               |  |  |  |  |  |  |  |                                              |  |                                              |  |  |  |  |  |  |  |  |  |  |
| Heterogeneity: Not applicable                                                                                                                                                                                                                                                                                                                                                                                                                                                                                                                                                                                                                                                                                                                                                                                       |                                |                 |        |                     |                     |                    |                    |                     |                 |                 |        |       |                    |                    |            |       |                    |                    |            |        |                   |    |                |   |    |        |                     |        |                   |  |              |    |  |   |    |        |                     |  |                               |  |  |  |  |  |  |  |                                              |  |                                              |  |  |  |  |  |  |  |  |  |  |
| Test for overall effect: Z = 0.01 (P = 0.99)                                                                                                                                                                                                                                                                                                                                                                                                                                                                                                                                                                                                                                                                                                                                                                        |                                |                 |        |                     |                     |                    |                    |                     |                 |                 |        |       |                    |                    |            |       |                    |                    |            |        |                   |    |                |   |    |        |                     |        |                   |  |              |    |  |   |    |        |                     |  |                               |  |  |  |  |  |  |  |                                              |  |                                              |  |  |  |  |  |  |  |  |  |  |
| <p><b>Reingreso</b></p> <p>Se identificó un solo estudio observacional que evaluó 73 pacientes (Soler 2012). No se observan diferencias entre los tipos de esputo respecto a la re-hospitalización a los 30 días aunque el número de eventos es muy escaso (4 en los pacientes con esputo purulento; 5 en los pacientes con esputo mucoide) (RR= 0.70, IC95% de 0.20 a 2.39).</p>                                                                                                                                                                                                                                                                                                                                                                                                                                   | <p><b>Calidad muy baja</b></p> |                 |        |                     |                     |                    |                    |                     |                 |                 |        |       |                    |                    |            |       |                    |                    |            |        |                   |    |                |   |    |        |                     |        |                   |  |              |    |  |   |    |        |                     |  |                               |  |  |  |  |  |  |  |                                              |  |                                              |  |  |  |  |  |  |  |  |  |  |
| <table><tr><th rowspan="2">Study or Subgroup</th><th colspan="2">Purulent sputum</th><th colspan="2">Non-purulent sputum</th><th rowspan="2">Weight</th><th colspan="2">Risk Ratio</th></tr><tr><th>Events</th><th>Total</th><th>Events</th><th>Total</th><th>M-H, Fixed, 95% CI</th><th>M-H, Fixed, 95% CI</th></tr><tr><td>Soler 2012</td><td>4</td><td>39</td><td>5</td><td>34</td><td>100.0%</td><td>0.70 [0.20, 2.39]</td><td></td></tr><tr><td>Total (95% CI)</td><td></td><td>39</td><td></td><td>34</td><td>100.0%</td><td>0.70 [0.20, 2.39]</td><td></td></tr><tr><td>Total events</td><td>4</td><td></td><td>5</td><td></td><td></td><td></td><td></td></tr><tr><td colspan="8">Heterogeneity: Not applicable</td></tr><tr><td colspan="8">Test for overall effect: Z = 0.57 (P = 0.57)</td></tr></table> | Study or Subgroup              | Purulent sputum |        | Non-purulent sputum |                     | Weight             | Risk Ratio         |                     | Events          | Total           | Events | Total | M-H, Fixed, 95% CI | M-H, Fixed, 95% CI | Soler 2012 | 4     | 39                 | 5                  | 34         | 100.0% | 0.70 [0.20, 2.39] |    | Total (95% CI) |   | 39 |        | 34                  | 100.0% | 0.70 [0.20, 2.39] |  | Total events | 4  |  | 5 |    |        |                     |  | Heterogeneity: Not applicable |  |  |  |  |  |  |  | Test for overall effect: Z = 0.57 (P = 0.57) |  |                                              |  |  |  |  |  |  |  |  |  |  |
| Study or Subgroup                                                                                                                                                                                                                                                                                                                                                                                                                                                                                                                                                                                                                                                                                                                                                                                                   |                                | Purulent sputum |        | Non-purulent sputum |                     |                    | Weight             | Risk Ratio          |                 |                 |        |       |                    |                    |            |       |                    |                    |            |        |                   |    |                |   |    |        |                     |        |                   |  |              |    |  |   |    |        |                     |  |                               |  |  |  |  |  |  |  |                                              |  |                                              |  |  |  |  |  |  |  |  |  |  |
|                                                                                                                                                                                                                                                                                                                                                                                                                                                                                                                                                                                                                                                                                                                                                                                                                     | Events                         | Total           | Events | Total               | M-H, Fixed, 95% CI  | M-H, Fixed, 95% CI |                    |                     |                 |                 |        |       |                    |                    |            |       |                    |                    |            |        |                   |    |                |   |    |        |                     |        |                   |  |              |    |  |   |    |        |                     |  |                               |  |  |  |  |  |  |  |                                              |  |                                              |  |  |  |  |  |  |  |  |  |  |
| Soler 2012                                                                                                                                                                                                                                                                                                                                                                                                                                                                                                                                                                                                                                                                                                                                                                                                          | 4                              | 39              | 5      | 34                  | 100.0%              | 0.70 [0.20, 2.39]  |                    |                     |                 |                 |        |       |                    |                    |            |       |                    |                    |            |        |                   |    |                |   |    |        |                     |        |                   |  |              |    |  |   |    |        |                     |  |                               |  |  |  |  |  |  |  |                                              |  |                                              |  |  |  |  |  |  |  |  |  |  |
| Total (95% CI)                                                                                                                                                                                                                                                                                                                                                                                                                                                                                                                                                                                                                                                                                                                                                                                                      |                                | 39              |        | 34                  | 100.0%              | 0.70 [0.20, 2.39]  |                    |                     |                 |                 |        |       |                    |                    |            |       |                    |                    |            |        |                   |    |                |   |    |        |                     |        |                   |  |              |    |  |   |    |        |                     |  |                               |  |  |  |  |  |  |  |                                              |  |                                              |  |  |  |  |  |  |  |  |  |  |
| Total events                                                                                                                                                                                                                                                                                                                                                                                                                                                                                                                                                                                                                                                                                                                                                                                                        | 4                              |                 | 5      |                     |                     |                    |                    |                     |                 |                 |        |       |                    |                    |            |       |                    |                    |            |        |                   |    |                |   |    |        |                     |        |                   |  |              |    |  |   |    |        |                     |  |                               |  |  |  |  |  |  |  |                                              |  |                                              |  |  |  |  |  |  |  |  |  |  |
| Heterogeneity: Not applicable                                                                                                                                                                                                                                                                                                                                                                                                                                                                                                                                                                                                                                                                                                                                                                                       |                                |                 |        |                     |                     |                    |                    |                     |                 |                 |        |       |                    |                    |            |       |                    |                    |            |        |                   |    |                |   |    |        |                     |        |                   |  |              |    |  |   |    |        |                     |  |                               |  |  |  |  |  |  |  |                                              |  |                                              |  |  |  |  |  |  |  |  |  |  |
| Test for overall effect: Z = 0.57 (P = 0.57)                                                                                                                                                                                                                                                                                                                                                                                                                                                                                                                                                                                                                                                                                                                                                                        |                                |                 |        |                     |                     |                    |                    |                     |                 |                 |        |       |                    |                    |            |       |                    |                    |            |        |                   |    |                |   |    |        |                     |        |                   |  |              |    |  |   |    |        |                     |  |                               |  |  |  |  |  |  |  |                                              |  |                                              |  |  |  |  |  |  |  |  |  |  |
| <p><b>Duración de la hospitalización (primera agudización)</b></p> <p>Se identificó un solo estudio observacional que evaluó 73 pacientes (Soler 2012). No se observan diferencias entre los tipos de esputo respecto a la duración de la estancia hospitalaria de la primera agudización.</p>                                                                                                                                                                                                                                                                                                                                                                                                                                                                                                                      | <p><b>Calidad muy baja</b></p> |                 |        |                     |                     |                    |                    |                     |                 |                 |        |       |                    |                    |            |       |                    |                    |            |        |                   |    |                |   |    |        |                     |        |                   |  |              |    |  |   |    |        |                     |  |                               |  |  |  |  |  |  |  |                                              |  |                                              |  |  |  |  |  |  |  |  |  |  |
| <table><tr><th rowspan="2">Study or Subgroup</th><th colspan="3">Purulent sputum</th><th colspan="3">Non-purulent sputum</th><th rowspan="2">Weight</th><th colspan="2">Mean Difference</th></tr><tr><th>Mean</th><th>SD</th><th>Total</th><th>Mean</th><th>SD</th><th>Total</th><th>IV, Random, 95% CI</th><th>IV, Random, 95% CI</th></tr><tr><td>Soler 2012</td><td>5.9</td><td>2.3</td><td>39</td><td>6.1</td><td>4</td><td>34</td><td>100.0%</td><td>-0.20 [-1.73, 1.33]</td><td></td></tr><tr><td>Total (95% CI)</td><td></td><td></td><td>39</td><td></td><td></td><td>34</td><td>100.0%</td><td>-0.20 [-1.73, 1.33]</td><td></td></tr><tr><td colspan="10">Heterogeneity: Not applicable</td></tr><tr><td colspan="10">Test for overall effect: Z = 0.26 (P = 0.80)</td></tr></table>                       | Study or Subgroup              | Purulent sputum |        |                     | Non-purulent sputum |                    |                    | Weight              | Mean Difference |                 | Mean   | SD    | Total              | Mean               | SD         | Total | IV, Random, 95% CI | IV, Random, 95% CI | Soler 2012 | 5.9    | 2.3               | 39 | 6.1            | 4 | 34 | 100.0% | -0.20 [-1.73, 1.33] |        | Total (95% CI)    |  |              | 39 |  |   | 34 | 100.0% | -0.20 [-1.73, 1.33] |  | Heterogeneity: Not applicable |  |  |  |  |  |  |  |                                              |  | Test for overall effect: Z = 0.26 (P = 0.80) |  |  |  |  |  |  |  |  |  |  |
| Study or Subgroup                                                                                                                                                                                                                                                                                                                                                                                                                                                                                                                                                                                                                                                                                                                                                                                                   |                                | Purulent sputum |        |                     | Non-purulent sputum |                    |                    |                     | Weight          | Mean Difference |        |       |                    |                    |            |       |                    |                    |            |        |                   |    |                |   |    |        |                     |        |                   |  |              |    |  |   |    |        |                     |  |                               |  |  |  |  |  |  |  |                                              |  |                                              |  |  |  |  |  |  |  |  |  |  |
|                                                                                                                                                                                                                                                                                                                                                                                                                                                                                                                                                                                                                                                                                                                                                                                                                     | Mean                           | SD              | Total  | Mean                | SD                  | Total              | IV, Random, 95% CI | IV, Random, 95% CI  |                 |                 |        |       |                    |                    |            |       |                    |                    |            |        |                   |    |                |   |    |        |                     |        |                   |  |              |    |  |   |    |        |                     |  |                               |  |  |  |  |  |  |  |                                              |  |                                              |  |  |  |  |  |  |  |  |  |  |
| Soler 2012                                                                                                                                                                                                                                                                                                                                                                                                                                                                                                                                                                                                                                                                                                                                                                                                          | 5.9                            | 2.3             | 39     | 6.1                 | 4                   | 34                 | 100.0%             | -0.20 [-1.73, 1.33] |                 |                 |        |       |                    |                    |            |       |                    |                    |            |        |                   |    |                |   |    |        |                     |        |                   |  |              |    |  |   |    |        |                     |  |                               |  |  |  |  |  |  |  |                                              |  |                                              |  |  |  |  |  |  |  |  |  |  |
| Total (95% CI)                                                                                                                                                                                                                                                                                                                                                                                                                                                                                                                                                                                                                                                                                                                                                                                                      |                                |                 | 39     |                     |                     | 34                 | 100.0%             | -0.20 [-1.73, 1.33] |                 |                 |        |       |                    |                    |            |       |                    |                    |            |        |                   |    |                |   |    |        |                     |        |                   |  |              |    |  |   |    |        |                     |  |                               |  |  |  |  |  |  |  |                                              |  |                                              |  |  |  |  |  |  |  |  |  |  |
| Heterogeneity: Not applicable                                                                                                                                                                                                                                                                                                                                                                                                                                                                                                                                                                                                                                                                                                                                                                                       |                                |                 |        |                     |                     |                    |                    |                     |                 |                 |        |       |                    |                    |            |       |                    |                    |            |        |                   |    |                |   |    |        |                     |        |                   |  |              |    |  |   |    |        |                     |  |                               |  |  |  |  |  |  |  |                                              |  |                                              |  |  |  |  |  |  |  |  |  |  |
| Test for overall effect: Z = 0.26 (P = 0.80)                                                                                                                                                                                                                                                                                                                                                                                                                                                                                                                                                                                                                                                                                                                                                                        |                                |                 |        |                     |                     |                    |                    |                     |                 |                 |        |       |                    |                    |            |       |                    |                    |            |        |                   |    |                |   |    |        |                     |        |                   |  |              |    |  |   |    |        |                     |  |                               |  |  |  |  |  |  |  |                                              |  |                                              |  |  |  |  |  |  |  |  |  |  |
| <p><b>Balance entre beneficios y riesgos</b></p> <p>La determinación subjetiva de un cambio en el color del esputo en pacientes con una agudización de la EPOC se asoció a una mayor identificación de bacterias potencialmente patógenas.</p> <p>Se trata de una prueba que no es invasiva, fácil de aplicar y sin coste alguno. En un escenario en que no se puedan aplicar otras determinaciones por falta de accesibilidad o tiempo, la valoración del cambio en el color del esputo podría tener un balance favorable.</p>                                                                                                                                                                                                                                                                                     |                                |                 |        |                     |                     |                    |                    |                     |                 |                 |        |       |                    |                    |            |       |                    |                    |            |        |                   |    |                |   |    |        |                     |        |                   |  |              |    |  |   |    |        |                     |  |                               |  |  |  |  |  |  |  |                                              |  |                                              |  |  |  |  |  |  |  |  |  |  |
| <p><b>Calidad global de la evidencia</b></p> <p>La confianza global con los resultados es MUY BAJA debido a que se incluyeron estudios con un diseño observacional y los resultados se presentan no ajustados por los principales factores de confusión. Debido al escaso número de pacientes y eventos incluidos, algunos de los resultados son también imprecisos.</p>                                                                                                                                                                                                                                                                                                                                                                                                                                            |                                |                 |        |                     |                     |                    |                    |                     |                 |                 |        |       |                    |                    |            |       |                    |                    |            |        |                   |    |                |   |    |        |                     |        |                   |  |              |    |  |   |    |        |                     |  |                               |  |  |  |  |  |  |  |                                              |  |                                              |  |  |  |  |  |  |  |  |  |  |
| <p><b>Uso de recursos y costes</b></p> <p>No se identificó ninguna referencia relevante para esta pregunta, aunque se trata de una prueba sin coste alguno.</p>                                                                                                                                                                                                                                                                                                                                                                                                                                                                                                                                                                                                                                                     |                                |                 |        |                     |                     |                    |                    |                     |                 |                 |        |       |                    |                    |            |       |                    |                    |            |        |                   |    |                |   |    |        |                     |        |                   |  |              |    |  |   |    |        |                     |  |                               |  |  |  |  |  |  |  |                                              |  |                                              |  |  |  |  |  |  |  |  |  |  |
| <p><b>Recomendaciones</b></p> <p>Se sugiere el uso de antibióticos ante la presencia de un cambio en el color del esputo (de mucoso a oscuro) en los pacientes con una agudización de la EPOC. (recomendación débil, calidad de evidencia muy baja).</p>                                                                                                                                                                                                                                                                                                                                                                                                                                                                                                                                                            |                                |                 |        |                     |                     |                    |                    |                     |                 |                 |        |       |                    |                    |            |       |                    |                    |            |        |                   |    |                |   |    |        |                     |        |                   |  |              |    |  |   |    |        |                     |  |                               |  |  |  |  |  |  |  |                                              |  |                                              |  |  |  |  |  |  |  |  |  |  |

**Pregunta:** La evaluación del esputo comparado con criterio clínico habitual para guiar el tratamiento con antibiótico en las agudizaciones de la EPOC

| Certainty assessment                                      |                          |                    |                    |                     |                    |                       | Nº de pacientes          |                           | Efecto                    |                                                 | Certainty                                                                                         | Importancia |
|-----------------------------------------------------------|--------------------------|--------------------|--------------------|---------------------|--------------------|-----------------------|--------------------------|---------------------------|---------------------------|-------------------------------------------------|---------------------------------------------------------------------------------------------------|-------------|
| Nº de estudios                                            | Diseño de estudio        | Riesgo de sesgo    | Inconsistencia     | Evidencia indirecta | Imprecisión        | Otras consideraciones | la evaluación del esputo | criterio clínico habitual | Relativo (95% CI)         | Absoluto (95% CI)                               |                                                                                                   |             |
| Curación clínica (resolución completa de los síntomas)    |                          |                    |                    |                     |                    |                       |                          |                           |                           |                                                 |                                                                                                   |             |
| 2                                                         | estudios observacionales | serio <sup>a</sup> | serio <sup>b</sup> | no es serio         | no es serio        | ninguno               | 95/126 (75.4%)           | 57/68 (83.8%)             | RR 0.79<br>(0.46 a 1.35)  | 176 menos por 1000<br>(de 453 menos a 293 más ) | <br>MUY BAJA   | CRÍTICO     |
| Mortalidad global                                         |                          |                    |                    |                     |                    |                       |                          |                           |                           |                                                 |                                                                                                   |             |
| 1                                                         | estudios observacionales | serio <sup>c</sup> | no es serio        | no es serio         | serio <sup>d</sup> | ninguno               | 2/39 (5.1%)              | 1/34 (2.9%)               | RR 1.74<br>(0.17 a 18.39) | 22 más por 1000<br>(de 24 menos a 511 más )     | <br>MUY BAJA   | CRÍTICO     |
| Duración de la estancia hospitalaria (agudización actual) |                          |                    |                    |                     |                    |                       |                          |                           |                           |                                                 |                                                                                                   |             |
| 1                                                         | estudios observacionales | serio <sup>c</sup> | no es serio        | no es serio         | no es serio        | ninguno               | 39                       | 34                        | -                         | MD 0.2 menos<br>(1.73 menos a 1.33 más )        | <br>MUY BAJA   | IMPORTANTE  |
| Número de nuevas agudizaciones                            |                          |                    |                    |                     |                    |                       |                          |                           |                           |                                                 |                                                                                                   |             |
| 1                                                         | estudios observacionales | serio <sup>c</sup> | no es serio        | no es serio         | serio <sup>d</sup> | ninguno               | 8/39 (20.5%)             | 7/34 (20.6%)              | RR 1.00<br>(0.40 a 2.46)  | 0 menos por 1000<br>(de 124 menos a 301 más )   | <br>MUY BAJA   | IMPORTANTE  |
| Número de nuevas hospitalizaciones                        |                          |                    |                    |                     |                    |                       |                          |                           |                           |                                                 |                                                                                                   |             |
| 1                                                         | estudios observacionales | serio <sup>c</sup> | no es serio        | no es serio         | serio <sup>d</sup> | ninguno               | 4/39 (10.3%)             | 5/34 (14.7%)              | RR 0.70<br>(0.20 a 2.39)  | 44 menos por 1000<br>(de 118 menos a 204 más )  | <br>MUY BAJA   | IMPORTANTE  |
| Identificación de bacterias potencialmente patológicas    |                          |                    |                    |                     |                    |                       |                          |                           |                           |                                                 |                                                                                                   |             |
| 6                                                         | estudios observacionales | serio <sup>e</sup> | serio <sup>b</sup> | serio <sup>f</sup>  | no es serio        | ninguno               | 670/771 (86.9%)          | 164/321 (51.1%)           | RR 2.14<br>(1.26 a 3.67)  | 582 más por 1000<br>(de 133 más a 1000 más )    | <br>MUY BAJA | IMPORTANTE  |

CI: Intervalo de confianza ; RR: Razón de riesgo; MD: Diferencia media

## Explicaciones

- a. Resultados no ajustados a otros factores de riesgo. Evaluación subjetiva del esputo por parte de los pacientes en un estudio.
- b. Variabilidad significativa en los resultados de los diferentes estudios.
- c. Estudio con evaluación subjetiva del esputo por parte de los pacientes.
- d. Número muy escaso de eventos
- e. Ninguno de los estudios presentó unos resultados ajustados a otros factores de riesgo. Evaluación subjetiva del esputo por parte de los pacientes en dos estudios.
- f. Desenlace subrogado de los desenlaces clínicos relevantes

### PREGUNTA 3

|                                                                                                                                                                                                                                                                                                                                                                                                                                                                                                                                                                                                                                                                                                                                                                                                                                                                                                                                                                                                                                                                                                                                                                                                                                                                                                                                                                                                                                                                                                                                                                                                                                                                                                                                                                                                                                                                                                                                                                                                                                                                         |                                |
|-------------------------------------------------------------------------------------------------------------------------------------------------------------------------------------------------------------------------------------------------------------------------------------------------------------------------------------------------------------------------------------------------------------------------------------------------------------------------------------------------------------------------------------------------------------------------------------------------------------------------------------------------------------------------------------------------------------------------------------------------------------------------------------------------------------------------------------------------------------------------------------------------------------------------------------------------------------------------------------------------------------------------------------------------------------------------------------------------------------------------------------------------------------------------------------------------------------------------------------------------------------------------------------------------------------------------------------------------------------------------------------------------------------------------------------------------------------------------------------------------------------------------------------------------------------------------------------------------------------------------------------------------------------------------------------------------------------------------------------------------------------------------------------------------------------------------------------------------------------------------------------------------------------------------------------------------------------------------------------------------------------------------------------------------------------------------|--------------------------------|
| <p><b>Pregunta para responder:</b><br/> <b>¿La determinación de la proteína C-reactiva (PCR), es útil para guiar la administración de antibióticos en los pacientes con una agudización de la EPOC?</b></p>                                                                                                                                                                                                                                                                                                                                                                                                                                                                                                                                                                                                                                                                                                                                                                                                                                                                                                                                                                                                                                                                                                                                                                                                                                                                                                                                                                                                                                                                                                                                                                                                                                                                                                                                                                                                                                                             |                                |
| <p>Se identificaron tres referencias relevantes, que incluían el mismo ensayo clínico aleatorizado (ECA) que evalúa el impacto sobre el uso de antibióticos y otros desenlaces clínicos de determinación de proteína C reactiva (PCR) en comparación con el tratamiento antibiótico guiado por criterios clínicos habituales.</p> <p>Para el análisis se incluyeron los resultados de tres publicaciones de un solo ensayo aleatorizado y abierto. Este estudio aleatorizó a 653 pacientes, de 40 años o más, con un diagnóstico de EPOC en atención primaria y una agudización definida como incremento de la disnea o aumento de la producción o purulencia del esputo de 24 horas y 21 días de duración. Se excluyeron los pacientes que requirieron ingreso hospitalario.</p> <p>El grupo asignado a tratamiento antibiótico guiado por la determinación de PCR se rigió según los siguientes criterios:<br/> Niveles de PCR &lt; 20 mg/l: el tratamiento antibiótico es poco probable que sea beneficioso y no se debería prescribir.<br/> Niveles de PCR entre 20 y 40 mg/l: el tratamiento antibiótico puede ser beneficioso si el paciente presenta esputo purulento.<br/> Niveles de PCR &gt; 40 mg/l: el tratamiento antibiótico probablemente sea beneficioso.</p> <p><b>Ensayos clínicos aleatorizados:</b></p> <ol style="list-style-type: none"> <li>Butler CC, Gillespie D, White P, Bates J, Lowe R, Thomas-Jones E, et al. C-Reactive Protein Testing to Guide Antibiotic Prescribing for COPD Exacerbations. N Engl J Med. 2019;381(2):111-20.</li> <li>Francis NA, Gillespie D, White P, Bates J, Lowe R, Sewell B, et al. C-reactive protein point-of-care testing for safely reducing antibiotics for acute exacerbations of chronic obstructive pulmonary disease: the PACE RCT. Health Technol Assess. 2020;24(15):1-108.</li> <li>Phillips R, Stanton H, Singh-Mehta A, Gillespie D, Bates J, Gal M, et al. C-reactive protein-guided antibiotic prescribing for COPD exacerbations: a qualitative evaluation. Br J Gen Pract. 2020.</li> </ol> |                                |
| <p><b>Consumo de antibióticos</b></p>                                                                                                                                                                                                                                                                                                                                                                                                                                                                                                                                                                                                                                                                                                                                                                                                                                                                                                                                                                                                                                                                                                                                                                                                                                                                                                                                                                                                                                                                                                                                                                                                                                                                                                                                                                                                                                                                                                                                                                                                                                   |                                |
| <p>El tratamiento con antibióticos guiado por PCR muestra una reducción del consumo de antibióticos (durante las 4 semanas posteriores) respecto un tratamiento guiado por criterios habituales: OR 0.31 (0.20 a 0.47); 259 menos por 1000 (de 368 menos a 157 menos).</p> <p>Los resultados crudos muestran que un 57% de los pacientes del grupo guiado por CRP consumieron antibióticos frente a un 77,4% del grupo guiado por criterios habituales.</p> <p>La confianza con los resultados es moderada (ver tabla de resumen de resultados).</p>                                                                                                                                                                                                                                                                                                                                                                                                                                                                                                                                                                                                                                                                                                                                                                                                                                                                                                                                                                                                                                                                                                                                                                                                                                                                                                                                                                                                                                                                                                                    | <p><b>Calidad moderada</b></p> |
| <p><b>Estado de salud (cuestionario clínico sobre la EPOC, CCQ)</b></p>                                                                                                                                                                                                                                                                                                                                                                                                                                                                                                                                                                                                                                                                                                                                                                                                                                                                                                                                                                                                                                                                                                                                                                                                                                                                                                                                                                                                                                                                                                                                                                                                                                                                                                                                                                                                                                                                                                                                                                                                 |                                |
| <p>El tratamiento con antibióticos guiado por PCR muestra una reducción del estado de salud medido con el cuestionario CCQ respecto un tratamiento guiado por criterios habituales: MD 0.19 puntos menos (0.33 a 0.05 menos).</p> <p>Según el extremo inferior del intervalo de confianza (-0,33 puntos) no se puede concluir la no inferioridad, es decir que la reducción de la prescripción de antibióticos guiada por PCR conlleve a una reducción clínicamente significativa del estado de salud</p>                                                                                                                                                                                                                                                                                                                                                                                                                                                                                                                                                                                                                                                                                                                                                                                                                                                                                                                                                                                                                                                                                                                                                                                                                                                                                                                                                                                                                                                                                                                                                               | <p><b>Calidad baja</b></p>     |

|                                                                                                                                                                                                                                                                                                                                                                                                                                                                                                                                                                                                                         |                         |                         |
|-------------------------------------------------------------------------------------------------------------------------------------------------------------------------------------------------------------------------------------------------------------------------------------------------------------------------------------------------------------------------------------------------------------------------------------------------------------------------------------------------------------------------------------------------------------------------------------------------------------------------|-------------------------|-------------------------|
| La confianza con los resultados es baja (ver tabla de resumen de resultados).                                                                                                                                                                                                                                                                                                                                                                                                                                                                                                                                           |                         |                         |
| <b>Prescripción de antibióticos</b>                                                                                                                                                                                                                                                                                                                                                                                                                                                                                                                                                                                     |                         |                         |
| <p>El tratamiento con antibióticos guiado por PCR muestra una reducción del tratamiento con antibióticos (en el momento de la consulta médica) respecto un tratamiento guiado por criterios habituales: OR 0.31 (0.21 a 0.45); 256 menos por 1000 (de 357 menos a 153 menos).</p> <p>Los resultados crudos muestran que un 47,7% de los pacientes del grupo guiado por PCR recibieron antibióticos en el momento de la consulta frente a un 69,7% del grupo guiado por criterios habituales.</p> <p>La confianza con los resultados es moderada (ver tabla de resumen de resultados).</p>                               | <b>Calidad moderada</b> |                         |
| <b>Calidad de vida (EQ-5D)</b>                                                                                                                                                                                                                                                                                                                                                                                                                                                                                                                                                                                          |                         |                         |
| <p>En el ECA seleccionado se reporta datos (1874 respuestas de 548 pacientes) sobre la calidad de vida hasta los 6 meses posteriores de los pacientes con agudizaciones de la EPOC.</p> <p>El tratamiento con antibióticos guiado por PCR muestra una mejor calidad de vida respecto a un tratamiento guiado por criterios habituales: MD 3.12 más (0.5 a 5.74 más).</p> <p>La confianza con los resultados es moderada (ver tabla de resumen de resultados).</p>                                                                                                                                                       |                         | <b>Calidad moderada</b> |
| <b>Hospitalización</b>                                                                                                                                                                                                                                                                                                                                                                                                                                                                                                                                                                                                  |                         |                         |
| <p>Durante 6 meses de seguimiento, 26 de los 304 pacientes (8.6%) en el grupo guiado por PCR tuvieron 35 hospitalizaciones, y 28 de 301 pacientes (9.3%) en el grupo de tratamiento guiado por criterios habituales tuvieron 34 hospitalizaciones.</p> <p>La confianza con los resultados es baja (ver tabla de resumen de resultados)</p>                                                                                                                                                                                                                                                                              | <b>Calidad baja</b>     |                         |
| <b>Eventos adversos</b>                                                                                                                                                                                                                                                                                                                                                                                                                                                                                                                                                                                                 |                         |                         |
| <p>Los resultados no muestran diferencias significativas entre el tratamiento con antibióticos guiado por PCR y el placebo: OR 0.79 (0.44 a 1.39); 21 menos a 23 más).</p> <p>Durante las primeras 4 semanas de seguimiento, se informaron dos eventos adversos graves (uno por neumonía y otro por insuficiencia respiratoria) en el grupo placebo. Ambos fueron eventos en los que los pacientes fallecieron. Ambos eventos no se consideraron que estuvieran relacionados con la intervención o participación en el estudio.</p> <p>La confianza con los resultados es baja (ver tabla de resumen de resultados)</p> |                         | <b>Calidad baja</b>     |
| <b>Balance entre beneficios y riesgos</b>                                                                                                                                                                                                                                                                                                                                                                                                                                                                                                                                                                               |                         |                         |
| <p>El tratamiento de antibióticos guiado por PCR se asocia a una reducción en el consumo de antibióticos y a mejor calidad de vida relacionada con la salud, sin efectos adversos relevantes, aunque con un mayor coste para el sistema nacional de salud.</p>                                                                                                                                                                                                                                                                                                                                                          |                         |                         |
| <b>Calidad global de la evidencia</b>                                                                                                                                                                                                                                                                                                                                                                                                                                                                                                                                                                                   |                         |                         |
| <p>Ninguno de los desenlaces evaluados en los estudios se consideró clave según el grupo de autores. La confianza con los desenlaces importantes fue entre baja y moderada debido al diseño de los estudios y a la imprecisión de los resultados.</p>                                                                                                                                                                                                                                                                                                                                                                   |                         |                         |
| <b>Uso de recursos y costes</b>                                                                                                                                                                                                                                                                                                                                                                                                                                                                                                                                                                                         |                         |                         |
| <p>El ECA incluido presentó también resultados de un estudio económico en una publicación independiente (Francis 2020).</p>                                                                                                                                                                                                                                                                                                                                                                                                                                                                                             |                         |                         |

A las cuatro semanas de seguimiento, los pacientes del grupo guiado por PCR tienen un mayor coste al sistema nacional de salud respecto a los pacientes del grupo guiado por criterios habituales: £17.59 más por paciente (95% IC: £-17.59 a £69.98;  $P = 0.408$ ). La media del índice de costo-efectividad incremental fue de £222 por 1% reducción en el consumo de antibióticos en comparación con el tratamiento habitual. A los 6 meses de seguimiento, la media del índice de costo-efectividad incremental fue de £15.251 por año de vida ajustado por calidad.

#### **Recomendaciones**

Se sugiere guiar el tratamiento antibiótico con la determinación de proteína C-reactiva (PCR) en los pacientes con una agudización de la EPOC en los que la valoración del cambio en el color del esputo no sea concluyente (recomendación débil, calidad de evidencia baja)

#### **Especificaciones**

En pacientes con PCR elevada ( $\geq 20$  mg/l) estará indicado el tratamiento con antibióticos.

Este biomarcador puede ser empleado tanto en medio hospitalario, como ambulatorio (PCR capilar).



Pregunta: ¿La determinación de la proteína C-reactiva (PCR), es útil para guiar la administración de antibióticos en los pacientes con una agudización de la EPOC?

| Certainty assessment                                                                                                |                    |                    |                |                     |                    |                       | Nº de pacientes                 |                 | Efecto                   |                                                    | Certainty                                                                                       | Importancia |
|---------------------------------------------------------------------------------------------------------------------|--------------------|--------------------|----------------|---------------------|--------------------|-----------------------|---------------------------------|-----------------|--------------------------|----------------------------------------------------|-------------------------------------------------------------------------------------------------|-------------|
| Nº de estudios                                                                                                      | Diseño de estudio  | Riesgo de sesgo    | Inconsistencia | Evidencia indirecta | Imprecisión        | Otras consideraciones | CRP-guided antibiotic treatment | placebo         | Relativo (95% CI)        | Absoluto (95% CI)                                  |                                                                                                 |             |
| Consumo antibióticos                                                                                                |                    |                    |                |                     |                    |                       |                                 |                 |                          |                                                    |                                                                                                 |             |
| 1                                                                                                                   | ensayos aleatorios | serio <sup>a</sup> | no es serio    | no es serio         | no es serio        | ninguno               | 150/263 (57.0%)                 | 212/274 (77.4%) | OR 0.31<br>(0.20 a 0.47) | 259 menos por 1000<br>(de 368 menos a 157 menos )  | <br>MODERADA | IMPORTANTE  |
| Estado de salud (cuestionario clínico sobre la EPOC) (seguimiento: 2 semanas; evaluado con : CCQ; Escala de: 0 a 6) |                    |                    |                |                     |                    |                       |                                 |                 |                          |                                                    |                                                                                                 |             |
| 1                                                                                                                   | ensayos aleatorios | serio <sup>a</sup> | no es serio    | no es serio         | serio <sup>b</sup> | ninguno               | 281                             | 282             | -                        | MD 0.19 puntos menos<br>(0.33 menos a 0.05 menos ) | <br>BAJA     | IMPORTANTE  |
| Prescripción de antibióticos (seguimiento: 4 semanas)                                                               |                    |                    |                |                     |                    |                       |                                 |                 |                          |                                                    |                                                                                                 |             |
| 1                                                                                                                   | ensayos aleatorios | serio <sup>a</sup> | no es serio    | no es serio         | no es serio        | ninguno               | 185/313 (59.1%)                 | 252/316 (79.7%) | OR 0.30<br>(0.20 a 0.46) | 256 menos por 1000<br>(de 357 menos a 153 menos )  | <br>MODERADA | IMPORTANTE  |
| Calidad de vida (seguimiento: 6 meses ; evaluado con : EQ-5D)                                                       |                    |                    |                |                     |                    |                       |                                 |                 |                          |                                                    |                                                                                                 |             |
| 1                                                                                                                   | ensayos aleatorios | serio <sup>a</sup> | no es serio    | no es serio         | no es serio        | ninguno               | 281                             | 282             | -                        | MD 3.12 más<br>(0.5 más a 5.74 más )               | <br>MODERADA | IMPORTANTE  |
| Eventos adversos (seguimiento: 4 semanas)                                                                           |                    |                    |                |                     |                    |                       |                                 |                 |                          |                                                    |                                                                                                 |             |
| 1                                                                                                                   | ensayos aleatorios | serio <sup>a</sup> | no es serio    | no es serio         | serio <sup>c</sup> | ninguno               | 255/285 (89.5%)                 | 264/289 (91.3%) | OR 0.79<br>(0.44 a 1.39) | 21 menos por 1000<br>(de 91 menos a 23 más )       | <br>BAJA    | IMPORTANTE  |

CI: Intervalo de confianza ; OR: Razón de momios; MD: Diferencia media

Explicaciones

a. Estudio abierto, no se excluye la posibilidad de sesgo debido a la evaluación de desenlaces de naturaleza subjetiva  
b. El extremo inferior del IC95% no excluye un efecto negativo clínicamente relevante (en la publicación del estudio no se excluyó la no-inferioridad).  
c. IC95% muy amplio que incluye un efeto relevante tanto beneficioso como perjudicial

#### PREGUNTA 4

##### **Pregunta para responder:**

**¿La determinación de la procalcitonina (PCT), es útil para guiar la administración de antibióticos en los pacientes con una agudización de la EPOC?**

Se identificaron cuatro revisiones sistemáticas, que incluían 11 ensayos clínicos aleatorizados (ECAs) que evaluaron la efectividad del tratamiento con antibióticos guiado por procalcitonina (PCT) en comparación con el tratamiento guiado por criterios clínicos habituales. Posteriormente no se ha identificado ningún estudio adicional relevante.

Todos los estudios incluyeron pacientes hospitalizados; uno de ellos (Daubin 2018) incluyó pacientes ingresados en una UCI por insuficiencia respiratoria aguda debido a una agudización de la EPOC.

##### **Revisiones sistemáticas:**

1. Li Z, Yuan X, Yu L, Wang B, Gao F, Ma J. Procalcitonin-guided antibiotic therapy in acute exacerbation of chronic obstructive pulmonary disease: An updated meta-analysis. *Medicine (Baltimore)*. 2019;98(32):e16775.
2. Ni W, Bao J, Yang D, Xi W, Wang K, Xu Y, et al. Potential of serum procalcitonin in predicting bacterial exacerbation and guiding antibiotic administration in severe COPD exacerbations: a systematic review and meta-analysis. *Infect Dis (Lond)*. 2019;51(9):639-50.
3. Mathioudakis AG, Chatzimavridou-Grigoriadou V, Corlateanu A, Vestbo J. Procalcitonin to guide antibiotic administration in COPD exacerbations: A meta-analysis. *European Respiratory Review*. 2017;26(143).
4. Lin C, Pang Q. Meta-analysis and systematic review of procalcitonin-guided treatment in acute exacerbation of chronic obstructive pulmonary disease. *Clinical Respiratory Journal*. 2018;12(1):10-5.

##### **Ensayos clínicos aleatorizados:**

1. Christ-Crain M, Jaccard-Stolz D, Bingisser R, et al. Effect of procalcitonin-guided treatment on antibiotic use and outcome in lower respiratory tract infections: cluster-randomised, single-blinded intervention trial. *Lancet*. 2004; 363:600–607.
2. Corti C, Fally M, Fabricius-Bjerre A, et al. Point-of-care procalcitonin test to reduce antibiotic exposure in patients hospitalized with acute exacerbation of COPD. *Int J Chron Obstruct Pulmon Dis* 2016; 11:1381–1389.
3. Daubin C, Valette X, Thiollere F, et al. Procalcitonin algorithm to guide initial antibiotic therapy in acute exacerbations of COPD admitted to the ICU: a randomized multicenter study. *Intensive Care Med*. 2018; 44:428–437.
4. Huang DT, Yealy DM, Filbin MR, et al. Procalcitonin-guided use of antibiotics for lower respiratory tract infection. *N Engl J Med*. 2018; 379:236–249.
5. Kristoffersen KB, Sogaard OS, Wejse C, et al. Antibiotic treatment interruption of suspected lower respiratory tract infections based on a single procalcitonin measurement at hospital admission – a randomized trial. *Clin Microbiol Infect* 2009; 15: 481–487.
6. Liu SS, Zhang YB. The value of serum procalcitonin level in guiding the use of antibiotic in patients with acute exacerbation of chronic obstructive pulmonary disease. *Chin J Antibiot*. 2015; 40:459–463.
7. Nangia V, Gandhi K. Use of procalcitonin to guide the antibiotic therapy in patients with an acute exacerbation of COPD in a resource-limited setting: a case-control study. *Clin Microbiol Infect*. 2012; 18:O404.
8. Schuetz P, Christ-Crain M, Thomann R, et al. Effect of procalcitonin- based guidelines vs standard guidelines on antibiotic use in lower respiratory tract infections: the ProHOSP randomized controlled trial. *JAMA*. 2009; 302:1059–1066.
9. Stolz D, Christ-Crain M, Bingisser R, et al. Antibiotic treatment of exacerbations of COPD: a randomized, controlled trial comparing procalcitonin-guidance with standard therapy. *Chest*. 2007; 131:9–19.
10. Verduri A, Luppi F, D'Amico R, et al. Antibiotic treatment of severe exacerbations of chronic obstructive pulmonary disease with procalcitonin: a randomized noninferiority trial. *PloS One*. 2015;10:e0118241.

11. Wang JX, Zhang SM, Li XH, et al. Acute exacerbations of chronic obstructive pulmonary disease with low serum procalcitonin values do not benefit from antibiotic treatment: a prospective randomized controlled trial. *Int J Infect Dis.* 2016;48:40–45.

### Tratamiento con antibióticos guiado por procalcitonina vs tratamiento con criterios clínicos habituales (placebo)

#### Fracaso terapéutico

En el análisis conjunto de los datos (6 ECAs, 182 eventos), el tratamiento con antibióticos guiado por procalcitonina no muestra una diferencia significativa respecto a placebo: RR 0.85 (0.66 a 1.09); 31 menos por 1000 (de 71 menos a 19 más).

La confianza con los resultados es baja (ver tabla de resumen de resultados).

**Calidad baja**

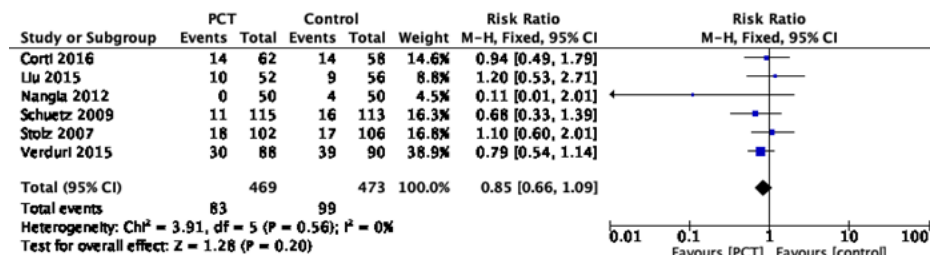

#### Mortalidad por cualquier causa

En el análisis conjunto de los datos (10 ECAs, 105 eventos), no se observa una diferencia significativa en la mortalidad por cualquier causa entre el tratamiento con antibióticos guiado por procalcitonina y el placebo: RR 1.25 (0.87 a 1.78); 15 más por 1000 (de 8 menos a 47 más).

La confianza con los resultados es moderada (ver tabla de resumen de resultados).

**Calidad moderada**

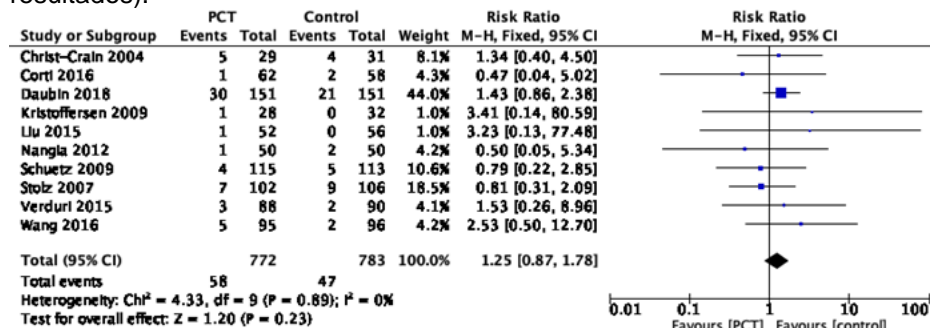

#### Duración estancia hospitalaria

En el análisis conjunto de los datos (11 ECAs, 2108 pacientes), no se observa una diferencia significativa en la estancia hospitalaria entre el tratamiento con antibióticos guiado por procalcitonina y el placebo: 0.03 días menos (-1.03 menos a 0.97 más).

La confianza con los resultados es moderada (ver tabla de resumen de resultados).

**Calidad moderada**

| <table><tr><th rowspan="2">Study or Subgroup</th><th colspan="3">PCT</th><th colspan="3">Control</th><th rowspan="2">Weight</th><th rowspan="2">Mean Difference<br/>IV, Random, 95% CI</th><th rowspan="2">Mean Difference<br/>IV, Random, 95% CI</th></tr><tr><th>Mean</th><th>SD</th><th>Total</th><th>Mean</th><th>SD</th><th>Total</th></tr><tr><td>Christ-Crain 2004</td><td>13.7</td><td>7.3</td><td>29</td><td>10.8</td><td>7</td><td>31</td><td>5.5%</td><td>2.90 [-0.72, 6.52]</td><td rowspan="12"></td></tr><tr><td>Corti 2016</td><td>4.5</td><td>2.96</td><td>62</td><td>5.1</td><td>4.44</td><td>58</td><td>12.9%</td><td>-0.60 [-1.96, 0.76]</td></tr><tr><td>Daubin 2018</td><td>18.85</td><td>18.29</td><td>151</td><td>14.82</td><td>9.48</td><td>151</td><td>6.2%</td><td>4.03 [0.74, 7.32]</td></tr><tr><td>Huang 2018</td><td>5.4</td><td>4.8</td><td>265</td><td>4.6</td><td>3.1</td><td>259</td><td>15.5%</td><td>0.80 [0.11, 1.49]</td></tr><tr><td>Kristoffersen 2009</td><td>4.8</td><td>2.8368</td><td>38</td><td>7.1</td><td>3.6057</td><td>51</td><td>13.0%</td><td>-2.30 [-3.64, -0.96]</td></tr><tr><td>Liu 2015</td><td>16.06</td><td>4.73</td><td>52</td><td>19.41</td><td>6.74</td><td>56</td><td>9.6%</td><td>-3.35 [-5.53, -1.17]</td></tr><tr><td>Nangia 2012</td><td>7.5</td><td>2.5</td><td>50</td><td>7.3</td><td>2.3</td><td>50</td><td>14.6%</td><td>0.20 [-0.74, 1.14]</td></tr><tr><td>Schuetz 2009</td><td>8.8</td><td>51.23</td><td>115</td><td>9.2</td><td>51.23</td><td>113</td><td>0.6%</td><td>-0.40 [-13.70, 12.90]</td></tr><tr><td>Stolz 2007</td><td>9</td><td>30.547</td><td>102</td><td>10</td><td>25.9622</td><td>106</td><td>1.6%</td><td>-1.00 [-8.72, 6.72]</td></tr><tr><td>Verduri 2015</td><td>5</td><td>7.0795</td><td>88</td><td>5</td><td>7.1618</td><td>90</td><td>9.9%</td><td>0.00 [-2.09, 2.09]</td></tr><tr><td>Wang 2016</td><td>10.9</td><td>8.1</td><td>95</td><td>9.9</td><td>5.1</td><td>96</td><td>10.6%</td><td>1.00 [-0.92, 2.92]</td></tr><tr><td>Total (95% CI)</td><td></td><td></td><td>1047</td><td></td><td></td><td>1061</td><td>100.0%</td><td>-0.05 [-1.08, 0.99]</td></tr></table> <p>Heterogeneity: <math>\tau^2 = 1.67</math>; <math>\chi^2 = 35.66</math>, <math>df = 10</math> (<math>P &lt; 0.0001</math>); <math>I^2 = 72\%</math><br/>Test for overall effect: <math>Z = 0.09</math> (<math>P = 0.93</math>)</p>                                                                      |        |        |         |         |         |                                   |                                   |                                       |                                       | Study or Subgroup | PCT |  |         | Control |        |                                   | Weight                            | Mean Difference<br>IV, Random, 95% CI | Mean Difference<br>IV, Random, 95% CI | Mean   | SD    | Total             | Mean | SD | Total | Christ-Crain 2004 | 13.7 | 7.3               | 29 | 10.8       | 7   | 31 | 5.5%  | 2.90 [-0.72, 6.52]   |       | Corti 2016        | 4.5         | 2.96 | 62  | 5.1 | 4.44 | 58    | 12.9%             | -0.60 [-1.96, 0.76]  | Daubin 2018 | 18.85 | 18.29 | 151 | 14.82 | 9.48              | 151                | 6.2%  | 4.03 [0.74, 7.32]  | Huang 2018 | 5.4 | 4.8   | 265               | 4.6      | 3.1 | 259 | 15.5% | 0.80 [0.11, 1.49]  | Kristoffersen 2009 | 4.8           | 2.8368      | 38 | 7.1   | 3.6057 | 51 | 13.0% | -2.30 [-3.64, -0.96] | Liu 2015     | 16.06 | 4.73 | 52 | 19.41 | 6.74  | 56                | 9.6%       | -3.35 [-5.53, -1.17] | Nangia 2012  | 7.5 | 2.5    | 50    | 7.3               | 2.3          | 50  | 14.6% | 0.20 [-0.74, 1.14]   | Schuetz 2009 | 8.8   | 51.23             | 115       | 9.2 | 51.23 | 113 | 0.6%  | -0.40 [-13.70, 12.90] | Stolz 2007        | 9              | 30.547 | 102  | 10 | 25.9622 | 106    | 1.6%              | -1.00 [-8.72, 6.72]  | Verduri 2015     | 5                | 7.0795 | 88 | 5 | 7.1618 | 90 | 9.9% | 0.00 [-2.09, 2.09] | Wang 2016 | 10.9 | 8.1 | 95 | 9.9 | 5.1 | 96 | 10.6% | 1.00 [-0.92, 2.92] | Total (95% CI) |  |  | 1047 |  |  | 1061 | 100.0% | -0.05 [-1.08, 0.99] |  |
|---------------------------------------------------------------------------------------------------------------------------------------------------------------------------------------------------------------------------------------------------------------------------------------------------------------------------------------------------------------------------------------------------------------------------------------------------------------------------------------------------------------------------------------------------------------------------------------------------------------------------------------------------------------------------------------------------------------------------------------------------------------------------------------------------------------------------------------------------------------------------------------------------------------------------------------------------------------------------------------------------------------------------------------------------------------------------------------------------------------------------------------------------------------------------------------------------------------------------------------------------------------------------------------------------------------------------------------------------------------------------------------------------------------------------------------------------------------------------------------------------------------------------------------------------------------------------------------------------------------------------------------------------------------------------------------------------------------------------------------------------------------------------------------------------------------------------------------------------------------------------------------------------------------------------------------------------------------------------------------------------------------------------------------------------------------------------------------------------------------------------------------------------------------------------------------------------------------------------------------------------------------------------------------------------------------------------------------------------------------------------------------------------------------------------------------------------------------------------------------|--------|--------|---------|---------|---------|-----------------------------------|-----------------------------------|---------------------------------------|---------------------------------------|-------------------|-----|--|---------|---------|--------|-----------------------------------|-----------------------------------|---------------------------------------|---------------------------------------|--------|-------|-------------------|------|----|-------|-------------------|------|-------------------|----|------------|-----|----|-------|----------------------|-------|-------------------|-------------|------|-----|-----|------|-------|-------------------|----------------------|-------------|-------|-------|-----|-------|-------------------|--------------------|-------|--------------------|------------|-----|-------|-------------------|----------|-----|-----|-------|--------------------|--------------------|---------------|-------------|----|-------|--------|----|-------|----------------------|--------------|-------|------|----|-------|-------|-------------------|------------|----------------------|--------------|-----|--------|-------|-------------------|--------------|-----|-------|----------------------|--------------|-------|-------------------|-----------|-----|-------|-----|-------|-----------------------|-------------------|----------------|--------|------|----|---------|--------|-------------------|----------------------|------------------|------------------|--------|----|---|--------|----|------|--------------------|-----------|------|-----|----|-----|-----|----|-------|--------------------|----------------|--|--|------|--|--|------|--------|---------------------|--|
| Study or Subgroup                                                                                                                                                                                                                                                                                                                                                                                                                                                                                                                                                                                                                                                                                                                                                                                                                                                                                                                                                                                                                                                                                                                                                                                                                                                                                                                                                                                                                                                                                                                                                                                                                                                                                                                                                                                                                                                                                                                                                                                                                                                                                                                                                                                                                                                                                                                                                                                                                                                                     | PCT    |        |         | Control |         |                                   | Weight                            | Mean Difference<br>IV, Random, 95% CI | Mean Difference<br>IV, Random, 95% CI |                   |     |  |         |         |        |                                   |                                   |                                       |                                       |        |       |                   |      |    |       |                   |      |                   |    |            |     |    |       |                      |       |                   |             |      |     |     |      |       |                   |                      |             |       |       |     |       |                   |                    |       |                    |            |     |       |                   |          |     |     |       |                    |                    |               |             |    |       |        |    |       |                      |              |       |      |    |       |       |                   |            |                      |              |     |        |       |                   |              |     |       |                      |              |       |                   |           |     |       |     |       |                       |                   |                |        |      |    |         |        |                   |                      |                  |                  |        |    |   |        |    |      |                    |           |      |     |    |     |     |    |       |                    |                |  |  |      |  |  |      |        |                     |  |
|                                                                                                                                                                                                                                                                                                                                                                                                                                                                                                                                                                                                                                                                                                                                                                                                                                                                                                                                                                                                                                                                                                                                                                                                                                                                                                                                                                                                                                                                                                                                                                                                                                                                                                                                                                                                                                                                                                                                                                                                                                                                                                                                                                                                                                                                                                                                                                                                                                                                                       | Mean   | SD     | Total   | Mean    | SD      | Total                             |                                   |                                       |                                       |                   |     |  |         |         |        |                                   |                                   |                                       |                                       |        |       |                   |      |    |       |                   |      |                   |    |            |     |    |       |                      |       |                   |             |      |     |     |      |       |                   |                      |             |       |       |     |       |                   |                    |       |                    |            |     |       |                   |          |     |     |       |                    |                    |               |             |    |       |        |    |       |                      |              |       |      |    |       |       |                   |            |                      |              |     |        |       |                   |              |     |       |                      |              |       |                   |           |     |       |     |       |                       |                   |                |        |      |    |         |        |                   |                      |                  |                  |        |    |   |        |    |      |                    |           |      |     |    |     |     |    |       |                    |                |  |  |      |  |  |      |        |                     |  |
| Christ-Crain 2004                                                                                                                                                                                                                                                                                                                                                                                                                                                                                                                                                                                                                                                                                                                                                                                                                                                                                                                                                                                                                                                                                                                                                                                                                                                                                                                                                                                                                                                                                                                                                                                                                                                                                                                                                                                                                                                                                                                                                                                                                                                                                                                                                                                                                                                                                                                                                                                                                                                                     | 13.7   | 7.3    | 29      | 10.8    | 7       | 31                                | 5.5%                              | 2.90 [-0.72, 6.52]                    |                                       |                   |     |  |         |         |        |                                   |                                   |                                       |                                       |        |       |                   |      |    |       |                   |      |                   |    |            |     |    |       |                      |       |                   |             |      |     |     |      |       |                   |                      |             |       |       |     |       |                   |                    |       |                    |            |     |       |                   |          |     |     |       |                    |                    |               |             |    |       |        |    |       |                      |              |       |      |    |       |       |                   |            |                      |              |     |        |       |                   |              |     |       |                      |              |       |                   |           |     |       |     |       |                       |                   |                |        |      |    |         |        |                   |                      |                  |                  |        |    |   |        |    |      |                    |           |      |     |    |     |     |    |       |                    |                |  |  |      |  |  |      |        |                     |  |
| Corti 2016                                                                                                                                                                                                                                                                                                                                                                                                                                                                                                                                                                                                                                                                                                                                                                                                                                                                                                                                                                                                                                                                                                                                                                                                                                                                                                                                                                                                                                                                                                                                                                                                                                                                                                                                                                                                                                                                                                                                                                                                                                                                                                                                                                                                                                                                                                                                                                                                                                                                            | 4.5    | 2.96   | 62      | 5.1     | 4.44    | 58                                | 12.9%                             | -0.60 [-1.96, 0.76]                   |                                       |                   |     |  |         |         |        |                                   |                                   |                                       |                                       |        |       |                   |      |    |       |                   |      |                   |    |            |     |    |       |                      |       |                   |             |      |     |     |      |       |                   |                      |             |       |       |     |       |                   |                    |       |                    |            |     |       |                   |          |     |     |       |                    |                    |               |             |    |       |        |    |       |                      |              |       |      |    |       |       |                   |            |                      |              |     |        |       |                   |              |     |       |                      |              |       |                   |           |     |       |     |       |                       |                   |                |        |      |    |         |        |                   |                      |                  |                  |        |    |   |        |    |      |                    |           |      |     |    |     |     |    |       |                    |                |  |  |      |  |  |      |        |                     |  |
| Daubin 2018                                                                                                                                                                                                                                                                                                                                                                                                                                                                                                                                                                                                                                                                                                                                                                                                                                                                                                                                                                                                                                                                                                                                                                                                                                                                                                                                                                                                                                                                                                                                                                                                                                                                                                                                                                                                                                                                                                                                                                                                                                                                                                                                                                                                                                                                                                                                                                                                                                                                           | 18.85  | 18.29  | 151     | 14.82   | 9.48    | 151                               | 6.2%                              | 4.03 [0.74, 7.32]                     |                                       |                   |     |  |         |         |        |                                   |                                   |                                       |                                       |        |       |                   |      |    |       |                   |      |                   |    |            |     |    |       |                      |       |                   |             |      |     |     |      |       |                   |                      |             |       |       |     |       |                   |                    |       |                    |            |     |       |                   |          |     |     |       |                    |                    |               |             |    |       |        |    |       |                      |              |       |      |    |       |       |                   |            |                      |              |     |        |       |                   |              |     |       |                      |              |       |                   |           |     |       |     |       |                       |                   |                |        |      |    |         |        |                   |                      |                  |                  |        |    |   |        |    |      |                    |           |      |     |    |     |     |    |       |                    |                |  |  |      |  |  |      |        |                     |  |
| Huang 2018                                                                                                                                                                                                                                                                                                                                                                                                                                                                                                                                                                                                                                                                                                                                                                                                                                                                                                                                                                                                                                                                                                                                                                                                                                                                                                                                                                                                                                                                                                                                                                                                                                                                                                                                                                                                                                                                                                                                                                                                                                                                                                                                                                                                                                                                                                                                                                                                                                                                            | 5.4    | 4.8    | 265     | 4.6     | 3.1     | 259                               | 15.5%                             | 0.80 [0.11, 1.49]                     |                                       |                   |     |  |         |         |        |                                   |                                   |                                       |                                       |        |       |                   |      |    |       |                   |      |                   |    |            |     |    |       |                      |       |                   |             |      |     |     |      |       |                   |                      |             |       |       |     |       |                   |                    |       |                    |            |     |       |                   |          |     |     |       |                    |                    |               |             |    |       |        |    |       |                      |              |       |      |    |       |       |                   |            |                      |              |     |        |       |                   |              |     |       |                      |              |       |                   |           |     |       |     |       |                       |                   |                |        |      |    |         |        |                   |                      |                  |                  |        |    |   |        |    |      |                    |           |      |     |    |     |     |    |       |                    |                |  |  |      |  |  |      |        |                     |  |
| Kristoffersen 2009                                                                                                                                                                                                                                                                                                                                                                                                                                                                                                                                                                                                                                                                                                                                                                                                                                                                                                                                                                                                                                                                                                                                                                                                                                                                                                                                                                                                                                                                                                                                                                                                                                                                                                                                                                                                                                                                                                                                                                                                                                                                                                                                                                                                                                                                                                                                                                                                                                                                    | 4.8    | 2.8368 | 38      | 7.1     | 3.6057  | 51                                | 13.0%                             | -2.30 [-3.64, -0.96]                  |                                       |                   |     |  |         |         |        |                                   |                                   |                                       |                                       |        |       |                   |      |    |       |                   |      |                   |    |            |     |    |       |                      |       |                   |             |      |     |     |      |       |                   |                      |             |       |       |     |       |                   |                    |       |                    |            |     |       |                   |          |     |     |       |                    |                    |               |             |    |       |        |    |       |                      |              |       |      |    |       |       |                   |            |                      |              |     |        |       |                   |              |     |       |                      |              |       |                   |           |     |       |     |       |                       |                   |                |        |      |    |         |        |                   |                      |                  |                  |        |    |   |        |    |      |                    |           |      |     |    |     |     |    |       |                    |                |  |  |      |  |  |      |        |                     |  |
| Liu 2015                                                                                                                                                                                                                                                                                                                                                                                                                                                                                                                                                                                                                                                                                                                                                                                                                                                                                                                                                                                                                                                                                                                                                                                                                                                                                                                                                                                                                                                                                                                                                                                                                                                                                                                                                                                                                                                                                                                                                                                                                                                                                                                                                                                                                                                                                                                                                                                                                                                                              | 16.06  | 4.73   | 52      | 19.41   | 6.74    | 56                                | 9.6%                              | -3.35 [-5.53, -1.17]                  |                                       |                   |     |  |         |         |        |                                   |                                   |                                       |                                       |        |       |                   |      |    |       |                   |      |                   |    |            |     |    |       |                      |       |                   |             |      |     |     |      |       |                   |                      |             |       |       |     |       |                   |                    |       |                    |            |     |       |                   |          |     |     |       |                    |                    |               |             |    |       |        |    |       |                      |              |       |      |    |       |       |                   |            |                      |              |     |        |       |                   |              |     |       |                      |              |       |                   |           |     |       |     |       |                       |                   |                |        |      |    |         |        |                   |                      |                  |                  |        |    |   |        |    |      |                    |           |      |     |    |     |     |    |       |                    |                |  |  |      |  |  |      |        |                     |  |
| Nangia 2012                                                                                                                                                                                                                                                                                                                                                                                                                                                                                                                                                                                                                                                                                                                                                                                                                                                                                                                                                                                                                                                                                                                                                                                                                                                                                                                                                                                                                                                                                                                                                                                                                                                                                                                                                                                                                                                                                                                                                                                                                                                                                                                                                                                                                                                                                                                                                                                                                                                                           | 7.5    | 2.5    | 50      | 7.3     | 2.3     | 50                                | 14.6%                             | 0.20 [-0.74, 1.14]                    |                                       |                   |     |  |         |         |        |                                   |                                   |                                       |                                       |        |       |                   |      |    |       |                   |      |                   |    |            |     |    |       |                      |       |                   |             |      |     |     |      |       |                   |                      |             |       |       |     |       |                   |                    |       |                    |            |     |       |                   |          |     |     |       |                    |                    |               |             |    |       |        |    |       |                      |              |       |      |    |       |       |                   |            |                      |              |     |        |       |                   |              |     |       |                      |              |       |                   |           |     |       |     |       |                       |                   |                |        |      |    |         |        |                   |                      |                  |                  |        |    |   |        |    |      |                    |           |      |     |    |     |     |    |       |                    |                |  |  |      |  |  |      |        |                     |  |
| Schuetz 2009                                                                                                                                                                                                                                                                                                                                                                                                                                                                                                                                                                                                                                                                                                                                                                                                                                                                                                                                                                                                                                                                                                                                                                                                                                                                                                                                                                                                                                                                                                                                                                                                                                                                                                                                                                                                                                                                                                                                                                                                                                                                                                                                                                                                                                                                                                                                                                                                                                                                          | 8.8    | 51.23  | 115     | 9.2     | 51.23   | 113                               | 0.6%                              | -0.40 [-13.70, 12.90]                 |                                       |                   |     |  |         |         |        |                                   |                                   |                                       |                                       |        |       |                   |      |    |       |                   |      |                   |    |            |     |    |       |                      |       |                   |             |      |     |     |      |       |                   |                      |             |       |       |     |       |                   |                    |       |                    |            |     |       |                   |          |     |     |       |                    |                    |               |             |    |       |        |    |       |                      |              |       |      |    |       |       |                   |            |                      |              |     |        |       |                   |              |     |       |                      |              |       |                   |           |     |       |     |       |                       |                   |                |        |      |    |         |        |                   |                      |                  |                  |        |    |   |        |    |      |                    |           |      |     |    |     |     |    |       |                    |                |  |  |      |  |  |      |        |                     |  |
| Stolz 2007                                                                                                                                                                                                                                                                                                                                                                                                                                                                                                                                                                                                                                                                                                                                                                                                                                                                                                                                                                                                                                                                                                                                                                                                                                                                                                                                                                                                                                                                                                                                                                                                                                                                                                                                                                                                                                                                                                                                                                                                                                                                                                                                                                                                                                                                                                                                                                                                                                                                            | 9      | 30.547 | 102     | 10      | 25.9622 | 106                               | 1.6%                              | -1.00 [-8.72, 6.72]                   |                                       |                   |     |  |         |         |        |                                   |                                   |                                       |                                       |        |       |                   |      |    |       |                   |      |                   |    |            |     |    |       |                      |       |                   |             |      |     |     |      |       |                   |                      |             |       |       |     |       |                   |                    |       |                    |            |     |       |                   |          |     |     |       |                    |                    |               |             |    |       |        |    |       |                      |              |       |      |    |       |       |                   |            |                      |              |     |        |       |                   |              |     |       |                      |              |       |                   |           |     |       |     |       |                       |                   |                |        |      |    |         |        |                   |                      |                  |                  |        |    |   |        |    |      |                    |           |      |     |    |     |     |    |       |                    |                |  |  |      |  |  |      |        |                     |  |
| Verduri 2015                                                                                                                                                                                                                                                                                                                                                                                                                                                                                                                                                                                                                                                                                                                                                                                                                                                                                                                                                                                                                                                                                                                                                                                                                                                                                                                                                                                                                                                                                                                                                                                                                                                                                                                                                                                                                                                                                                                                                                                                                                                                                                                                                                                                                                                                                                                                                                                                                                                                          | 5      | 7.0795 | 88      | 5       | 7.1618  | 90                                | 9.9%                              | 0.00 [-2.09, 2.09]                    |                                       |                   |     |  |         |         |        |                                   |                                   |                                       |                                       |        |       |                   |      |    |       |                   |      |                   |    |            |     |    |       |                      |       |                   |             |      |     |     |      |       |                   |                      |             |       |       |     |       |                   |                    |       |                    |            |     |       |                   |          |     |     |       |                    |                    |               |             |    |       |        |    |       |                      |              |       |      |    |       |       |                   |            |                      |              |     |        |       |                   |              |     |       |                      |              |       |                   |           |     |       |     |       |                       |                   |                |        |      |    |         |        |                   |                      |                  |                  |        |    |   |        |    |      |                    |           |      |     |    |     |     |    |       |                    |                |  |  |      |  |  |      |        |                     |  |
| Wang 2016                                                                                                                                                                                                                                                                                                                                                                                                                                                                                                                                                                                                                                                                                                                                                                                                                                                                                                                                                                                                                                                                                                                                                                                                                                                                                                                                                                                                                                                                                                                                                                                                                                                                                                                                                                                                                                                                                                                                                                                                                                                                                                                                                                                                                                                                                                                                                                                                                                                                             | 10.9   | 8.1    | 95      | 9.9     | 5.1     | 96                                | 10.6%                             | 1.00 [-0.92, 2.92]                    |                                       |                   |     |  |         |         |        |                                   |                                   |                                       |                                       |        |       |                   |      |    |       |                   |      |                   |    |            |     |    |       |                      |       |                   |             |      |     |     |      |       |                   |                      |             |       |       |     |       |                   |                    |       |                    |            |     |       |                   |          |     |     |       |                    |                    |               |             |    |       |        |    |       |                      |              |       |      |    |       |       |                   |            |                      |              |     |        |       |                   |              |     |       |                      |              |       |                   |           |     |       |     |       |                       |                   |                |        |      |    |         |        |                   |                      |                  |                  |        |    |   |        |    |      |                    |           |      |     |    |     |     |    |       |                    |                |  |  |      |  |  |      |        |                     |  |
| Total (95% CI)                                                                                                                                                                                                                                                                                                                                                                                                                                                                                                                                                                                                                                                                                                                                                                                                                                                                                                                                                                                                                                                                                                                                                                                                                                                                                                                                                                                                                                                                                                                                                                                                                                                                                                                                                                                                                                                                                                                                                                                                                                                                                                                                                                                                                                                                                                                                                                                                                                                                        |        |        | 1047    |         |         | 1061                              | 100.0%                            | -0.05 [-1.08, 0.99]                   |                                       |                   |     |  |         |         |        |                                   |                                   |                                       |                                       |        |       |                   |      |    |       |                   |      |                   |    |            |     |    |       |                      |       |                   |             |      |     |     |      |       |                   |                      |             |       |       |     |       |                   |                    |       |                    |            |     |       |                   |          |     |     |       |                    |                    |               |             |    |       |        |    |       |                      |              |       |      |    |       |       |                   |            |                      |              |     |        |       |                   |              |     |       |                      |              |       |                   |           |     |       |     |       |                       |                   |                |        |      |    |         |        |                   |                      |                  |                  |        |    |   |        |    |      |                    |           |      |     |    |     |     |    |       |                    |                |  |  |      |  |  |      |        |                     |  |
| <h3>Prescripción de antibióticos</h3> <p>En el análisis conjunto de los datos (11 ECA, 2099 pacientes), el tratamiento con antibióticos guiado por procalcitonina muestra una reducción significativa de la prescripción de antibióticos respecto a placebo: RR 0.55 (0.42 a 0.72); 304 menos por 1000 (de 391 menos a 189 menos).</p> <p>La confianza con los resultados es moderada (ver tabla de resumen de resultados).</p> <table><tr><th rowspan="2">Study or Subgroup</th><th colspan="2">PCT</th><th colspan="2">Control</th><th rowspan="2">Weight</th><th rowspan="2">Risk Ratio<br/>M-H, Random, 95% CI</th><th rowspan="2">Risk Ratio<br/>M-H, Random, 95% CI</th></tr><tr><th>Events</th><th>Total</th><th>Events</th><th>Total</th></tr><tr><td>Christ-Crain 2004</td><td>11</td><td>29</td><td>27</td><td>31</td><td>8.5%</td><td>0.44 [0.27, 0.71]</td><td rowspan="10"></td></tr><tr><td>Corti 2016</td><td>36</td><td>62</td><td>43</td><td>58</td><td>10.4%</td><td>0.78 [0.60, 1.02]</td></tr><tr><td>Daubin 2018</td><td>89</td><td>151</td><td>93</td><td>151</td><td>11.0%</td><td>0.96 [0.80, 1.15]</td></tr><tr><td>Huang 2018</td><td>108</td><td>265</td><td>115</td><td>259</td><td>10.9%</td><td>0.92 [0.75, 1.12]</td></tr><tr><td>Kristoffersen 2009</td><td>26</td><td>38</td><td>41</td><td>42</td><td>10.7%</td><td>0.70 [0.56, 0.87]</td></tr><tr><td>Liu 2015</td><td>0</td><td>52</td><td>0</td><td>56</td><td></td><td>Not estimable</td></tr><tr><td>Nangia 2012</td><td>9</td><td>50</td><td>50</td><td>50</td><td>7.6%</td><td>0.19 [0.11, 0.33]</td></tr><tr><td>Schuetz 2009</td><td>56</td><td>115</td><td>79</td><td>113</td><td>10.7%</td><td>0.70 [0.56, 0.87]</td></tr><tr><td>Stolz 2007</td><td>41</td><td>102</td><td>76</td><td>106</td><td>10.4%</td><td>0.56 [0.43, 0.73]</td></tr><tr><td>Verduri 2015</td><td>43</td><td>88</td><td>90</td><td>90</td><td>10.8%</td><td>0.49 [0.40, 0.61]</td></tr><tr><td>Wang 2016</td><td>17</td><td>96</td><td>95</td><td>95</td><td>9.0%</td><td>0.18 [0.12, 0.28]</td></tr><tr><td>Total (95% CI)</td><td></td><td>1048</td><td></td><td>1051</td><td>100.0%</td><td>0.55 [0.42, 0.72]</td><td></td></tr></table> <p>Total events: 436 / 709<br/>Heterogeneity: <math>\tau^2 = 0.17</math>; <math>\chi^2 = 98.23</math>, <math>df = 9</math> (<math>P &lt; 0.00001</math>); <math>I^2 = 91\%</math><br/>Test for overall effect: <math>Z = 4.35</math> (<math>P &lt; 0.0001</math>)</p> |        |        |         |         |         |                                   |                                   |                                       |                                       | Study or Subgroup | PCT |  | Control |         | Weight | Risk Ratio<br>M-H, Random, 95% CI | Risk Ratio<br>M-H, Random, 95% CI | Events                                | Total                                 | Events | Total | Christ-Crain 2004 | 11   | 29 | 27    | 31                | 8.5% | 0.44 [0.27, 0.71] |    | Corti 2016 | 36  | 62 | 43    | 58                   | 10.4% | 0.78 [0.60, 1.02] | Daubin 2018 | 89   | 151 | 93  | 151  | 11.0% | 0.96 [0.80, 1.15] | Huang 2018           | 108         | 265   | 115   | 259 | 10.9% | 0.92 [0.75, 1.12] | Kristoffersen 2009 | 26    | 38                 | 41         | 42  | 10.7% | 0.70 [0.56, 0.87] | Liu 2015 | 0   | 52  | 0     | 56                 |                    | Not estimable | Nangia 2012 | 9  | 50    | 50     | 50 | 7.6%  | 0.19 [0.11, 0.33]    | Schuetz 2009 | 56    | 115  | 79 | 113   | 10.7% | 0.70 [0.56, 0.87] | Stolz 2007 | 41                   | 102          | 76  | 106    | 10.4% | 0.56 [0.43, 0.73] | Verduri 2015 | 43  | 88    | 90                   | 90           | 10.8% | 0.49 [0.40, 0.61] | Wang 2016 | 17  | 96    | 95  | 95    | 9.0%                  | 0.18 [0.12, 0.28] | Total (95% CI) |        | 1048 |    | 1051    | 100.0% | 0.55 [0.42, 0.72] |                      | Calidad moderada |                  |        |    |   |        |    |      |                    |           |      |     |    |     |     |    |       |                    |                |  |  |      |  |  |      |        |                     |  |
| Study or Subgroup                                                                                                                                                                                                                                                                                                                                                                                                                                                                                                                                                                                                                                                                                                                                                                                                                                                                                                                                                                                                                                                                                                                                                                                                                                                                                                                                                                                                                                                                                                                                                                                                                                                                                                                                                                                                                                                                                                                                                                                                                                                                                                                                                                                                                                                                                                                                                                                                                                                                     | PCT    |        | Control |         | Weight  | Risk Ratio<br>M-H, Random, 95% CI | Risk Ratio<br>M-H, Random, 95% CI |                                       |                                       |                   |     |  |         |         |        |                                   |                                   |                                       |                                       |        |       |                   |      |    |       |                   |      |                   |    |            |     |    |       |                      |       |                   |             |      |     |     |      |       |                   |                      |             |       |       |     |       |                   |                    |       |                    |            |     |       |                   |          |     |     |       |                    |                    |               |             |    |       |        |    |       |                      |              |       |      |    |       |       |                   |            |                      |              |     |        |       |                   |              |     |       |                      |              |       |                   |           |     |       |     |       |                       |                   |                |        |      |    |         |        |                   |                      |                  |                  |        |    |   |        |    |      |                    |           |      |     |    |     |     |    |       |                    |                |  |  |      |  |  |      |        |                     |  |
|                                                                                                                                                                                                                                                                                                                                                                                                                                                                                                                                                                                                                                                                                                                                                                                                                                                                                                                                                                                                                                                                                                                                                                                                                                                                                                                                                                                                                                                                                                                                                                                                                                                                                                                                                                                                                                                                                                                                                                                                                                                                                                                                                                                                                                                                                                                                                                                                                                                                                       | Events | Total  | Events  | Total   |         |                                   |                                   |                                       |                                       |                   |     |  |         |         |        |                                   |                                   |                                       |                                       |        |       |                   |      |    |       |                   |      |                   |    |            |     |    |       |                      |       |                   |             |      |     |     |      |       |                   |                      |             |       |       |     |       |                   |                    |       |                    |            |     |       |                   |          |     |     |       |                    |                    |               |             |    |       |        |    |       |                      |              |       |      |    |       |       |                   |            |                      |              |     |        |       |                   |              |     |       |                      |              |       |                   |           |     |       |     |       |                       |                   |                |        |      |    |         |        |                   |                      |                  |                  |        |    |   |        |    |      |                    |           |      |     |    |     |     |    |       |                    |                |  |  |      |  |  |      |        |                     |  |
| Christ-Crain 2004                                                                                                                                                                                                                                                                                                                                                                                                                                                                                                                                                                                                                                                                                                                                                                                                                                                                                                                                                                                                                                                                                                                                                                                                                                                                                                                                                                                                                                                                                                                                                                                                                                                                                                                                                                                                                                                                                                                                                                                                                                                                                                                                                                                                                                                                                                                                                                                                                                                                     | 11     | 29     | 27      | 31      | 8.5%    | 0.44 [0.27, 0.71]                 |                                   |                                       |                                       |                   |     |  |         |         |        |                                   |                                   |                                       |                                       |        |       |                   |      |    |       |                   |      |                   |    |            |     |    |       |                      |       |                   |             |      |     |     |      |       |                   |                      |             |       |       |     |       |                   |                    |       |                    |            |     |       |                   |          |     |     |       |                    |                    |               |             |    |       |        |    |       |                      |              |       |      |    |       |       |                   |            |                      |              |     |        |       |                   |              |     |       |                      |              |       |                   |           |     |       |     |       |                       |                   |                |        |      |    |         |        |                   |                      |                  |                  |        |    |   |        |    |      |                    |           |      |     |    |     |     |    |       |                    |                |  |  |      |  |  |      |        |                     |  |
| Corti 2016                                                                                                                                                                                                                                                                                                                                                                                                                                                                                                                                                                                                                                                                                                                                                                                                                                                                                                                                                                                                                                                                                                                                                                                                                                                                                                                                                                                                                                                                                                                                                                                                                                                                                                                                                                                                                                                                                                                                                                                                                                                                                                                                                                                                                                                                                                                                                                                                                                                                            | 36     | 62     | 43      | 58      | 10.4%   | 0.78 [0.60, 1.02]                 |                                   |                                       |                                       |                   |     |  |         |         |        |                                   |                                   |                                       |                                       |        |       |                   |      |    |       |                   |      |                   |    |            |     |    |       |                      |       |                   |             |      |     |     |      |       |                   |                      |             |       |       |     |       |                   |                    |       |                    |            |     |       |                   |          |     |     |       |                    |                    |               |             |    |       |        |    |       |                      |              |       |      |    |       |       |                   |            |                      |              |     |        |       |                   |              |     |       |                      |              |       |                   |           |     |       |     |       |                       |                   |                |        |      |    |         |        |                   |                      |                  |                  |        |    |   |        |    |      |                    |           |      |     |    |     |     |    |       |                    |                |  |  |      |  |  |      |        |                     |  |
| Daubin 2018                                                                                                                                                                                                                                                                                                                                                                                                                                                                                                                                                                                                                                                                                                                                                                                                                                                                                                                                                                                                                                                                                                                                                                                                                                                                                                                                                                                                                                                                                                                                                                                                                                                                                                                                                                                                                                                                                                                                                                                                                                                                                                                                                                                                                                                                                                                                                                                                                                                                           | 89     | 151    | 93      | 151     | 11.0%   | 0.96 [0.80, 1.15]                 |                                   |                                       |                                       |                   |     |  |         |         |        |                                   |                                   |                                       |                                       |        |       |                   |      |    |       |                   |      |                   |    |            |     |    |       |                      |       |                   |             |      |     |     |      |       |                   |                      |             |       |       |     |       |                   |                    |       |                    |            |     |       |                   |          |     |     |       |                    |                    |               |             |    |       |        |    |       |                      |              |       |      |    |       |       |                   |            |                      |              |     |        |       |                   |              |     |       |                      |              |       |                   |           |     |       |     |       |                       |                   |                |        |      |    |         |        |                   |                      |                  |                  |        |    |   |        |    |      |                    |           |      |     |    |     |     |    |       |                    |                |  |  |      |  |  |      |        |                     |  |
| Huang 2018                                                                                                                                                                                                                                                                                                                                                                                                                                                                                                                                                                                                                                                                                                                                                                                                                                                                                                                                                                                                                                                                                                                                                                                                                                                                                                                                                                                                                                                                                                                                                                                                                                                                                                                                                                                                                                                                                                                                                                                                                                                                                                                                                                                                                                                                                                                                                                                                                                                                            | 108    | 265    | 115     | 259     | 10.9%   | 0.92 [0.75, 1.12]                 |                                   |                                       |                                       |                   |     |  |         |         |        |                                   |                                   |                                       |                                       |        |       |                   |      |    |       |                   |      |                   |    |            |     |    |       |                      |       |                   |             |      |     |     |      |       |                   |                      |             |       |       |     |       |                   |                    |       |                    |            |     |       |                   |          |     |     |       |                    |                    |               |             |    |       |        |    |       |                      |              |       |      |    |       |       |                   |            |                      |              |     |        |       |                   |              |     |       |                      |              |       |                   |           |     |       |     |       |                       |                   |                |        |      |    |         |        |                   |                      |                  |                  |        |    |   |        |    |      |                    |           |      |     |    |     |     |    |       |                    |                |  |  |      |  |  |      |        |                     |  |
| Kristoffersen 2009                                                                                                                                                                                                                                                                                                                                                                                                                                                                                                                                                                                                                                                                                                                                                                                                                                                                                                                                                                                                                                                                                                                                                                                                                                                                                                                                                                                                                                                                                                                                                                                                                                                                                                                                                                                                                                                                                                                                                                                                                                                                                                                                                                                                                                                                                                                                                                                                                                                                    | 26     | 38     | 41      | 42      | 10.7%   | 0.70 [0.56, 0.87]                 |                                   |                                       |                                       |                   |     |  |         |         |        |                                   |                                   |                                       |                                       |        |       |                   |      |    |       |                   |      |                   |    |            |     |    |       |                      |       |                   |             |      |     |     |      |       |                   |                      |             |       |       |     |       |                   |                    |       |                    |            |     |       |                   |          |     |     |       |                    |                    |               |             |    |       |        |    |       |                      |              |       |      |    |       |       |                   |            |                      |              |     |        |       |                   |              |     |       |                      |              |       |                   |           |     |       |     |       |                       |                   |                |        |      |    |         |        |                   |                      |                  |                  |        |    |   |        |    |      |                    |           |      |     |    |     |     |    |       |                    |                |  |  |      |  |  |      |        |                     |  |
| Liu 2015                                                                                                                                                                                                                                                                                                                                                                                                                                                                                                                                                                                                                                                                                                                                                                                                                                                                                                                                                                                                                                                                                                                                                                                                                                                                                                                                                                                                                                                                                                                                                                                                                                                                                                                                                                                                                                                                                                                                                                                                                                                                                                                                                                                                                                                                                                                                                                                                                                                                              | 0      | 52     | 0       | 56      |         | Not estimable                     |                                   |                                       |                                       |                   |     |  |         |         |        |                                   |                                   |                                       |                                       |        |       |                   |      |    |       |                   |      |                   |    |            |     |    |       |                      |       |                   |             |      |     |     |      |       |                   |                      |             |       |       |     |       |                   |                    |       |                    |            |     |       |                   |          |     |     |       |                    |                    |               |             |    |       |        |    |       |                      |              |       |      |    |       |       |                   |            |                      |              |     |        |       |                   |              |     |       |                      |              |       |                   |           |     |       |     |       |                       |                   |                |        |      |    |         |        |                   |                      |                  |                  |        |    |   |        |    |      |                    |           |      |     |    |     |     |    |       |                    |                |  |  |      |  |  |      |        |                     |  |
| Nangia 2012                                                                                                                                                                                                                                                                                                                                                                                                                                                                                                                                                                                                                                                                                                                                                                                                                                                                                                                                                                                                                                                                                                                                                                                                                                                                                                                                                                                                                                                                                                                                                                                                                                                                                                                                                                                                                                                                                                                                                                                                                                                                                                                                                                                                                                                                                                                                                                                                                                                                           | 9      | 50     | 50      | 50      | 7.6%    | 0.19 [0.11, 0.33]                 |                                   |                                       |                                       |                   |     |  |         |         |        |                                   |                                   |                                       |                                       |        |       |                   |      |    |       |                   |      |                   |    |            |     |    |       |                      |       |                   |             |      |     |     |      |       |                   |                      |             |       |       |     |       |                   |                    |       |                    |            |     |       |                   |          |     |     |       |                    |                    |               |             |    |       |        |    |       |                      |              |       |      |    |       |       |                   |            |                      |              |     |        |       |                   |              |     |       |                      |              |       |                   |           |     |       |     |       |                       |                   |                |        |      |    |         |        |                   |                      |                  |                  |        |    |   |        |    |      |                    |           |      |     |    |     |     |    |       |                    |                |  |  |      |  |  |      |        |                     |  |
| Schuetz 2009                                                                                                                                                                                                                                                                                                                                                                                                                                                                                                                                                                                                                                                                                                                                                                                                                                                                                                                                                                                                                                                                                                                                                                                                                                                                                                                                                                                                                                                                                                                                                                                                                                                                                                                                                                                                                                                                                                                                                                                                                                                                                                                                                                                                                                                                                                                                                                                                                                                                          | 56     | 115    | 79      | 113     | 10.7%   | 0.70 [0.56, 0.87]                 |                                   |                                       |                                       |                   |     |  |         |         |        |                                   |                                   |                                       |                                       |        |       |                   |      |    |       |                   |      |                   |    |            |     |    |       |                      |       |                   |             |      |     |     |      |       |                   |                      |             |       |       |     |       |                   |                    |       |                    |            |     |       |                   |          |     |     |       |                    |                    |               |             |    |       |        |    |       |                      |              |       |      |    |       |       |                   |            |                      |              |     |        |       |                   |              |     |       |                      |              |       |                   |           |     |       |     |       |                       |                   |                |        |      |    |         |        |                   |                      |                  |                  |        |    |   |        |    |      |                    |           |      |     |    |     |     |    |       |                    |                |  |  |      |  |  |      |        |                     |  |
| Stolz 2007                                                                                                                                                                                                                                                                                                                                                                                                                                                                                                                                                                                                                                                                                                                                                                                                                                                                                                                                                                                                                                                                                                                                                                                                                                                                                                                                                                                                                                                                                                                                                                                                                                                                                                                                                                                                                                                                                                                                                                                                                                                                                                                                                                                                                                                                                                                                                                                                                                                                            | 41     | 102    | 76      | 106     | 10.4%   | 0.56 [0.43, 0.73]                 |                                   |                                       |                                       |                   |     |  |         |         |        |                                   |                                   |                                       |                                       |        |       |                   |      |    |       |                   |      |                   |    |            |     |    |       |                      |       |                   |             |      |     |     |      |       |                   |                      |             |       |       |     |       |                   |                    |       |                    |            |     |       |                   |          |     |     |       |                    |                    |               |             |    |       |        |    |       |                      |              |       |      |    |       |       |                   |            |                      |              |     |        |       |                   |              |     |       |                      |              |       |                   |           |     |       |     |       |                       |                   |                |        |      |    |         |        |                   |                      |                  |                  |        |    |   |        |    |      |                    |           |      |     |    |     |     |    |       |                    |                |  |  |      |  |  |      |        |                     |  |
| Verduri 2015                                                                                                                                                                                                                                                                                                                                                                                                                                                                                                                                                                                                                                                                                                                                                                                                                                                                                                                                                                                                                                                                                                                                                                                                                                                                                                                                                                                                                                                                                                                                                                                                                                                                                                                                                                                                                                                                                                                                                                                                                                                                                                                                                                                                                                                                                                                                                                                                                                                                          | 43     | 88     | 90      | 90      | 10.8%   | 0.49 [0.40, 0.61]                 |                                   |                                       |                                       |                   |     |  |         |         |        |                                   |                                   |                                       |                                       |        |       |                   |      |    |       |                   |      |                   |    |            |     |    |       |                      |       |                   |             |      |     |     |      |       |                   |                      |             |       |       |     |       |                   |                    |       |                    |            |     |       |                   |          |     |     |       |                    |                    |               |             |    |       |        |    |       |                      |              |       |      |    |       |       |                   |            |                      |              |     |        |       |                   |              |     |       |                      |              |       |                   |           |     |       |     |       |                       |                   |                |        |      |    |         |        |                   |                      |                  |                  |        |    |   |        |    |      |                    |           |      |     |    |     |     |    |       |                    |                |  |  |      |  |  |      |        |                     |  |
| Wang 2016                                                                                                                                                                                                                                                                                                                                                                                                                                                                                                                                                                                                                                                                                                                                                                                                                                                                                                                                                                                                                                                                                                                                                                                                                                                                                                                                                                                                                                                                                                                                                                                                                                                                                                                                                                                                                                                                                                                                                                                                                                                                                                                                                                                                                                                                                                                                                                                                                                                                             | 17     | 96     | 95      | 95      | 9.0%    | 0.18 [0.12, 0.28]                 |                                   |                                       |                                       |                   |     |  |         |         |        |                                   |                                   |                                       |                                       |        |       |                   |      |    |       |                   |      |                   |    |            |     |    |       |                      |       |                   |             |      |     |     |      |       |                   |                      |             |       |       |     |       |                   |                    |       |                    |            |     |       |                   |          |     |     |       |                    |                    |               |             |    |       |        |    |       |                      |              |       |      |    |       |       |                   |            |                      |              |     |        |       |                   |              |     |       |                      |              |       |                   |           |     |       |     |       |                       |                   |                |        |      |    |         |        |                   |                      |                  |                  |        |    |   |        |    |      |                    |           |      |     |    |     |     |    |       |                    |                |  |  |      |  |  |      |        |                     |  |
| Total (95% CI)                                                                                                                                                                                                                                                                                                                                                                                                                                                                                                                                                                                                                                                                                                                                                                                                                                                                                                                                                                                                                                                                                                                                                                                                                                                                                                                                                                                                                                                                                                                                                                                                                                                                                                                                                                                                                                                                                                                                                                                                                                                                                                                                                                                                                                                                                                                                                                                                                                                                        |        | 1048   |         | 1051    | 100.0%  | 0.55 [0.42, 0.72]                 |                                   |                                       |                                       |                   |     |  |         |         |        |                                   |                                   |                                       |                                       |        |       |                   |      |    |       |                   |      |                   |    |            |     |    |       |                      |       |                   |             |      |     |     |      |       |                   |                      |             |       |       |     |       |                   |                    |       |                    |            |     |       |                   |          |     |     |       |                    |                    |               |             |    |       |        |    |       |                      |              |       |      |    |       |       |                   |            |                      |              |     |        |       |                   |              |     |       |                      |              |       |                   |           |     |       |     |       |                       |                   |                |        |      |    |         |        |                   |                      |                  |                  |        |    |   |        |    |      |                    |           |      |     |    |     |     |    |       |                    |                |  |  |      |  |  |      |        |                     |  |
| <h3>Duración del tratamiento antibiótico</h3> <p>En el análisis conjunto de los datos (8 ECAs, 1602), el tratamiento con antibióticos guiado por procalcitonina muestra una reducción en la duración del tratamiento con antibióticos respecto a placebo: MD 2.54 días menos (4.27 a 0.81 menos).</p> <p>La confianza con los resultados es moderada (ver tabla de resumen de resultados).</p> <table><tr><th rowspan="2">Study or Subgroup</th><th colspan="3">PCT</th><th colspan="3">Control</th><th rowspan="2">Weight</th><th rowspan="2">Mean Difference<br/>IV, Random, 95% CI</th><th rowspan="2">Mean Difference<br/>IV, Random, 95% CI</th></tr><tr><th>Mean</th><th>SD</th><th>Total</th><th>Mean</th><th>SD</th><th>Total</th></tr><tr><td>Christ-Crain 2004</td><td>3.3</td><td>2.1</td><td>29</td><td>7.92</td><td>2.8</td><td>31</td><td>12.9%</td><td>-4.62 [-5.87, -3.37]</td><td rowspan="8"></td></tr><tr><td>Corti 2016</td><td>6.1</td><td>7.41</td><td>62</td><td>9</td><td>7.4</td><td>58</td><td>10.4%</td><td>-2.90 [-5.55, -0.25]</td></tr><tr><td>Daubin 2018</td><td>7.9</td><td>8</td><td>151</td><td>7.7</td><td>5.7</td><td>151</td><td>12.4%</td><td>0.20 [-1.37, 1.77]</td></tr><tr><td>Huang 2018</td><td>3</td><td>3.9</td><td>265</td><td>2.8</td><td>2.4</td><td>259</td><td>13.6%</td><td>0.20 [-0.35, 0.75]</td></tr><tr><td>Kristoffersen 2009</td><td>4.368</td><td>4.2228</td><td>38</td><td>6.461</td><td>6.2536</td><td>52</td><td>11.4%</td><td>-2.09 [-4.26, 0.07]</td></tr><tr><td>Nangia 2012</td><td>2.1</td><td>2.62</td><td>50</td><td>7.02</td><td>2.6</td><td>50</td><td>13.2%</td><td>-4.92 [-5.94, -3.90]</td></tr><tr><td>Schuetz 2009</td><td>2.5</td><td>5.6622</td><td>115</td><td>5.1</td><td>5.6622</td><td>113</td><td>12.6%</td><td>-2.60 [-4.07, -1.13]</td></tr><tr><td>Verduri 2015</td><td>6.42</td><td>3.519</td><td>88</td><td>10</td><td>0.1</td><td>90</td><td>13.5%</td><td>-3.58 [-4.32, -2.84]</td></tr><tr><td>Total (95% CI)</td><td></td><td></td><td>798</td><td></td><td></td><td>804</td><td>100.0%</td><td>-2.54 [-4.27, -0.81]</td><td></td></tr></table> <p>Heterogeneity: <math>\tau^2 = 5.62</math>; <math>\chi^2 = 135.37</math>, <math>df = 7</math> (<math>P &lt; 0.00001</math>); <math>I^2 = 95\%</math><br/>Test for overall effect: <math>Z = 2.88</math> (<math>P = 0.004</math>)</p>                                                                                                    |        |        |         |         |         |                                   |                                   |                                       |                                       | Study or Subgroup | PCT |  |         | Control |        |                                   | Weight                            | Mean Difference<br>IV, Random, 95% CI | Mean Difference<br>IV, Random, 95% CI | Mean   | SD    | Total             | Mean | SD | Total | Christ-Crain 2004 | 3.3  | 2.1               | 29 | 7.92       | 2.8 | 31 | 12.9% | -4.62 [-5.87, -3.37] |       | Corti 2016        | 6.1         | 7.41 | 62  | 9   | 7.4  | 58    | 10.4%             | -2.90 [-5.55, -0.25] | Daubin 2018 | 7.9   | 8     | 151 | 7.7   | 5.7               | 151                | 12.4% | 0.20 [-1.37, 1.77] | Huang 2018 | 3   | 3.9   | 265               | 2.8      | 2.4 | 259 | 13.6% | 0.20 [-0.35, 0.75] | Kristoffersen 2009 | 4.368         | 4.2228      | 38 | 6.461 | 6.2536 | 52 | 11.4% | -2.09 [-4.26, 0.07]  | Nangia 2012  | 2.1   | 2.62 | 50 | 7.02  | 2.6   | 50                | 13.2%      | -4.92 [-5.94, -3.90] | Schuetz 2009 | 2.5 | 5.6622 | 115   | 5.1               | 5.6622       | 113 | 12.6% | -2.60 [-4.07, -1.13] | Verduri 2015 | 6.42  | 3.519             | 88        | 10  | 0.1   | 90  | 13.5% | -3.58 [-4.32, -2.84]  | Total (95% CI)    |                |        | 798  |    |         | 804    | 100.0%            | -2.54 [-4.27, -0.81] |                  | Calidad moderada |        |    |   |        |    |      |                    |           |      |     |    |     |     |    |       |                    |                |  |  |      |  |  |      |        |                     |  |
| Study or Subgroup                                                                                                                                                                                                                                                                                                                                                                                                                                                                                                                                                                                                                                                                                                                                                                                                                                                                                                                                                                                                                                                                                                                                                                                                                                                                                                                                                                                                                                                                                                                                                                                                                                                                                                                                                                                                                                                                                                                                                                                                                                                                                                                                                                                                                                                                                                                                                                                                                                                                     | PCT    |        |         | Control |         |                                   | Weight                            | Mean Difference<br>IV, Random, 95% CI | Mean Difference<br>IV, Random, 95% CI |                   |     |  |         |         |        |                                   |                                   |                                       |                                       |        |       |                   |      |    |       |                   |      |                   |    |            |     |    |       |                      |       |                   |             |      |     |     |      |       |                   |                      |             |       |       |     |       |                   |                    |       |                    |            |     |       |                   |          |     |     |       |                    |                    |               |             |    |       |        |    |       |                      |              |       |      |    |       |       |                   |            |                      |              |     |        |       |                   |              |     |       |                      |              |       |                   |           |     |       |     |       |                       |                   |                |        |      |    |         |        |                   |                      |                  |                  |        |    |   |        |    |      |                    |           |      |     |    |     |     |    |       |                    |                |  |  |      |  |  |      |        |                     |  |
|                                                                                                                                                                                                                                                                                                                                                                                                                                                                                                                                                                                                                                                                                                                                                                                                                                                                                                                                                                                                                                                                                                                                                                                                                                                                                                                                                                                                                                                                                                                                                                                                                                                                                                                                                                                                                                                                                                                                                                                                                                                                                                                                                                                                                                                                                                                                                                                                                                                                                       | Mean   | SD     | Total   | Mean    | SD      | Total                             |                                   |                                       |                                       |                   |     |  |         |         |        |                                   |                                   |                                       |                                       |        |       |                   |      |    |       |                   |      |                   |    |            |     |    |       |                      |       |                   |             |      |     |     |      |       |                   |                      |             |       |       |     |       |                   |                    |       |                    |            |     |       |                   |          |     |     |       |                    |                    |               |             |    |       |        |    |       |                      |              |       |      |    |       |       |                   |            |                      |              |     |        |       |                   |              |     |       |                      |              |       |                   |           |     |       |     |       |                       |                   |                |        |      |    |         |        |                   |                      |                  |                  |        |    |   |        |    |      |                    |           |      |     |    |     |     |    |       |                    |                |  |  |      |  |  |      |        |                     |  |
| Christ-Crain 2004                                                                                                                                                                                                                                                                                                                                                                                                                                                                                                                                                                                                                                                                                                                                                                                                                                                                                                                                                                                                                                                                                                                                                                                                                                                                                                                                                                                                                                                                                                                                                                                                                                                                                                                                                                                                                                                                                                                                                                                                                                                                                                                                                                                                                                                                                                                                                                                                                                                                     | 3.3    | 2.1    | 29      | 7.92    | 2.8     | 31                                | 12.9%                             | -4.62 [-5.87, -3.37]                  |                                       |                   |     |  |         |         |        |                                   |                                   |                                       |                                       |        |       |                   |      |    |       |                   |      |                   |    |            |     |    |       |                      |       |                   |             |      |     |     |      |       |                   |                      |             |       |       |     |       |                   |                    |       |                    |            |     |       |                   |          |     |     |       |                    |                    |               |             |    |       |        |    |       |                      |              |       |      |    |       |       |                   |            |                      |              |     |        |       |                   |              |     |       |                      |              |       |                   |           |     |       |     |       |                       |                   |                |        |      |    |         |        |                   |                      |                  |                  |        |    |   |        |    |      |                    |           |      |     |    |     |     |    |       |                    |                |  |  |      |  |  |      |        |                     |  |
| Corti 2016                                                                                                                                                                                                                                                                                                                                                                                                                                                                                                                                                                                                                                                                                                                                                                                                                                                                                                                                                                                                                                                                                                                                                                                                                                                                                                                                                                                                                                                                                                                                                                                                                                                                                                                                                                                                                                                                                                                                                                                                                                                                                                                                                                                                                                                                                                                                                                                                                                                                            | 6.1    | 7.41   | 62      | 9       | 7.4     | 58                                | 10.4%                             | -2.90 [-5.55, -0.25]                  |                                       |                   |     |  |         |         |        |                                   |                                   |                                       |                                       |        |       |                   |      |    |       |                   |      |                   |    |            |     |    |       |                      |       |                   |             |      |     |     |      |       |                   |                      |             |       |       |     |       |                   |                    |       |                    |            |     |       |                   |          |     |     |       |                    |                    |               |             |    |       |        |    |       |                      |              |       |      |    |       |       |                   |            |                      |              |     |        |       |                   |              |     |       |                      |              |       |                   |           |     |       |     |       |                       |                   |                |        |      |    |         |        |                   |                      |                  |                  |        |    |   |        |    |      |                    |           |      |     |    |     |     |    |       |                    |                |  |  |      |  |  |      |        |                     |  |
| Daubin 2018                                                                                                                                                                                                                                                                                                                                                                                                                                                                                                                                                                                                                                                                                                                                                                                                                                                                                                                                                                                                                                                                                                                                                                                                                                                                                                                                                                                                                                                                                                                                                                                                                                                                                                                                                                                                                                                                                                                                                                                                                                                                                                                                                                                                                                                                                                                                                                                                                                                                           | 7.9    | 8      | 151     | 7.7     | 5.7     | 151                               | 12.4%                             | 0.20 [-1.37, 1.77]                    |                                       |                   |     |  |         |         |        |                                   |                                   |                                       |                                       |        |       |                   |      |    |       |                   |      |                   |    |            |     |    |       |                      |       |                   |             |      |     |     |      |       |                   |                      |             |       |       |     |       |                   |                    |       |                    |            |     |       |                   |          |     |     |       |                    |                    |               |             |    |       |        |    |       |                      |              |       |      |    |       |       |                   |            |                      |              |     |        |       |                   |              |     |       |                      |              |       |                   |           |     |       |     |       |                       |                   |                |        |      |    |         |        |                   |                      |                  |                  |        |    |   |        |    |      |                    |           |      |     |    |     |     |    |       |                    |                |  |  |      |  |  |      |        |                     |  |
| Huang 2018                                                                                                                                                                                                                                                                                                                                                                                                                                                                                                                                                                                                                                                                                                                                                                                                                                                                                                                                                                                                                                                                                                                                                                                                                                                                                                                                                                                                                                                                                                                                                                                                                                                                                                                                                                                                                                                                                                                                                                                                                                                                                                                                                                                                                                                                                                                                                                                                                                                                            | 3      | 3.9    | 265     | 2.8     | 2.4     | 259                               | 13.6%                             | 0.20 [-0.35, 0.75]                    |                                       |                   |     |  |         |         |        |                                   |                                   |                                       |                                       |        |       |                   |      |    |       |                   |      |                   |    |            |     |    |       |                      |       |                   |             |      |     |     |      |       |                   |                      |             |       |       |     |       |                   |                    |       |                    |            |     |       |                   |          |     |     |       |                    |                    |               |             |    |       |        |    |       |                      |              |       |      |    |       |       |                   |            |                      |              |     |        |       |                   |              |     |       |                      |              |       |                   |           |     |       |     |       |                       |                   |                |        |      |    |         |        |                   |                      |                  |                  |        |    |   |        |    |      |                    |           |      |     |    |     |     |    |       |                    |                |  |  |      |  |  |      |        |                     |  |
| Kristoffersen 2009                                                                                                                                                                                                                                                                                                                                                                                                                                                                                                                                                                                                                                                                                                                                                                                                                                                                                                                                                                                                                                                                                                                                                                                                                                                                                                                                                                                                                                                                                                                                                                                                                                                                                                                                                                                                                                                                                                                                                                                                                                                                                                                                                                                                                                                                                                                                                                                                                                                                    | 4.368  | 4.2228 | 38      | 6.461   | 6.2536  | 52                                | 11.4%                             | -2.09 [-4.26, 0.07]                   |                                       |                   |     |  |         |         |        |                                   |                                   |                                       |                                       |        |       |                   |      |    |       |                   |      |                   |    |            |     |    |       |                      |       |                   |             |      |     |     |      |       |                   |                      |             |       |       |     |       |                   |                    |       |                    |            |     |       |                   |          |     |     |       |                    |                    |               |             |    |       |        |    |       |                      |              |       |      |    |       |       |                   |            |                      |              |     |        |       |                   |              |     |       |                      |              |       |                   |           |     |       |     |       |                       |                   |                |        |      |    |         |        |                   |                      |                  |                  |        |    |   |        |    |      |                    |           |      |     |    |     |     |    |       |                    |                |  |  |      |  |  |      |        |                     |  |
| Nangia 2012                                                                                                                                                                                                                                                                                                                                                                                                                                                                                                                                                                                                                                                                                                                                                                                                                                                                                                                                                                                                                                                                                                                                                                                                                                                                                                                                                                                                                                                                                                                                                                                                                                                                                                                                                                                                                                                                                                                                                                                                                                                                                                                                                                                                                                                                                                                                                                                                                                                                           | 2.1    | 2.62   | 50      | 7.02    | 2.6     | 50                                | 13.2%                             | -4.92 [-5.94, -3.90]                  |                                       |                   |     |  |         |         |        |                                   |                                   |                                       |                                       |        |       |                   |      |    |       |                   |      |                   |    |            |     |    |       |                      |       |                   |             |      |     |     |      |       |                   |                      |             |       |       |     |       |                   |                    |       |                    |            |     |       |                   |          |     |     |       |                    |                    |               |             |    |       |        |    |       |                      |              |       |      |    |       |       |                   |            |                      |              |     |        |       |                   |              |     |       |                      |              |       |                   |           |     |       |     |       |                       |                   |                |        |      |    |         |        |                   |                      |                  |                  |        |    |   |        |    |      |                    |           |      |     |    |     |     |    |       |                    |                |  |  |      |  |  |      |        |                     |  |
| Schuetz 2009                                                                                                                                                                                                                                                                                                                                                                                                                                                                                                                                                                                                                                                                                                                                                                                                                                                                                                                                                                                                                                                                                                                                                                                                                                                                                                                                                                                                                                                                                                                                                                                                                                                                                                                                                                                                                                                                                                                                                                                                                                                                                                                                                                                                                                                                                                                                                                                                                                                                          | 2.5    | 5.6622 | 115     | 5.1     | 5.6622  | 113                               | 12.6%                             | -2.60 [-4.07, -1.13]                  |                                       |                   |     |  |         |         |        |                                   |                                   |                                       |                                       |        |       |                   |      |    |       |                   |      |                   |    |            |     |    |       |                      |       |                   |             |      |     |     |      |       |                   |                      |             |       |       |     |       |                   |                    |       |                    |            |     |       |                   |          |     |     |       |                    |                    |               |             |    |       |        |    |       |                      |              |       |      |    |       |       |                   |            |                      |              |     |        |       |                   |              |     |       |                      |              |       |                   |           |     |       |     |       |                       |                   |                |        |      |    |         |        |                   |                      |                  |                  |        |    |   |        |    |      |                    |           |      |     |    |     |     |    |       |                    |                |  |  |      |  |  |      |        |                     |  |
| Verduri 2015                                                                                                                                                                                                                                                                                                                                                                                                                                                                                                                                                                                                                                                                                                                                                                                                                                                                                                                                                                                                                                                                                                                                                                                                                                                                                                                                                                                                                                                                                                                                                                                                                                                                                                                                                                                                                                                                                                                                                                                                                                                                                                                                                                                                                                                                                                                                                                                                                                                                          | 6.42   | 3.519  | 88      | 10      | 0.1     | 90                                | 13.5%                             | -3.58 [-4.32, -2.84]                  |                                       |                   |     |  |         |         |        |                                   |                                   |                                       |                                       |        |       |                   |      |    |       |                   |      |                   |    |            |     |    |       |                      |       |                   |             |      |     |     |      |       |                   |                      |             |       |       |     |       |                   |                    |       |                    |            |     |       |                   |          |     |     |       |                    |                    |               |             |    |       |        |    |       |                      |              |       |      |    |       |       |                   |            |                      |              |     |        |       |                   |              |     |       |                      |              |       |                   |           |     |       |     |       |                       |                   |                |        |      |    |         |        |                   |                      |                  |                  |        |    |   |        |    |      |                    |           |      |     |    |     |     |    |       |                    |                |  |  |      |  |  |      |        |                     |  |
| Total (95% CI)                                                                                                                                                                                                                                                                                                                                                                                                                                                                                                                                                                                                                                                                                                                                                                                                                                                                                                                                                                                                                                                                                                                                                                                                                                                                                                                                                                                                                                                                                                                                                                                                                                                                                                                                                                                                                                                                                                                                                                                                                                                                                                                                                                                                                                                                                                                                                                                                                                                                        |        |        | 798     |         |         | 804                               | 100.0%                            | -2.54 [-4.27, -0.81]                  |                                       |                   |     |  |         |         |        |                                   |                                   |                                       |                                       |        |       |                   |      |    |       |                   |      |                   |    |            |     |    |       |                      |       |                   |             |      |     |     |      |       |                   |                      |             |       |       |     |       |                   |                    |       |                    |            |     |       |                   |          |     |     |       |                    |                    |               |             |    |       |        |    |       |                      |              |       |      |    |       |       |                   |            |                      |              |     |        |       |                   |              |     |       |                      |              |       |                   |           |     |       |     |       |                       |                   |                |        |      |    |         |        |                   |                      |                  |                  |        |    |   |        |    |      |                    |           |      |     |    |     |     |    |       |                    |                |  |  |      |  |  |      |        |                     |  |
| <h3>Recurrencia de agudizaciones</h3> <p>En el análisis conjunto de los datos (7 ECAs, 417 eventos), no se observa una diferencia significativa entre el tratamiento con antibióticos guiado por procalcitonina y el placebo: RR 1.02 (0.91 a 1.15); 8 más por 1000 (de 34 menos a 57 más).</p> <p>La confianza con los resultados es baja (ver tabla de resumen de resultados).</p>                                                                                                                                                                                                                                                                                                                                                                                                                                                                                                                                                                                                                                                                                                                                                                                                                                                                                                                                                                                                                                                                                                                                                                                                                                                                                                                                                                                                                                                                                                                                                                                                                                                                                                                                                                                                                                                                                                                                                                                                                                                                                                  |        |        |         |         |         |                                   |                                   |                                       |                                       | Calidad baja      |     |  |         |         |        |                                   |                                   |                                       |                                       |        |       |                   |      |    |       |                   |      |                   |    |            |     |    |       |                      |       |                   |             |      |     |     |      |       |                   |                      |             |       |       |     |       |                   |                    |       |                    |            |     |       |                   |          |     |     |       |                    |                    |               |             |    |       |        |    |       |                      |              |       |      |    |       |       |                   |            |                      |              |     |        |       |                   |              |     |       |                      |              |       |                   |           |     |       |     |       |                       |                   |                |        |      |    |         |        |                   |                      |                  |                  |        |    |   |        |    |      |                    |           |      |     |    |     |     |    |       |                    |                |  |  |      |  |  |      |        |                     |  |

| <table><tr><th rowspan="2">Study or Subgroup</th><th colspan="2">PCT</th><th colspan="2">Control</th><th rowspan="2">Weight</th><th colspan="2">Risk Ratio</th><th rowspan="2">M-H, Fixed, 95% CI</th></tr><tr><th>Events</th><th>Total</th><th>Events</th><th>Total</th><th>M-H, Fixed, 95% CI</th></tr><tr><td>Christ-Crain 2004</td><td>22</td><td>29</td><td>18</td><td>31</td><td>8.4%</td><td>1.31</td><td>[0.91, 1.88]</td><td rowspan="7"></td></tr><tr><td>Corti 2016</td><td>60</td><td>62</td><td>56</td><td>58</td><td>28.0%</td><td>1.00</td><td>[0.94, 1.07]</td></tr><tr><td>Liu 2015</td><td>14</td><td>44</td><td>15</td><td>46</td><td>7.1%</td><td>0.98</td><td>[0.54, 1.78]</td></tr><tr><td>Schuetz 2009</td><td>6</td><td>115</td><td>11</td><td>113</td><td>5.4%</td><td>0.54</td><td>[0.21, 1.40]</td></tr><tr><td>Stolz 2007</td><td>63</td><td>102</td><td>71</td><td>106</td><td>33.7%</td><td>0.92</td><td>[0.75, 1.13]</td></tr><tr><td>Verduri 2015</td><td>28</td><td>88</td><td>25</td><td>90</td><td>12.0%</td><td>1.15</td><td>[0.73, 1.80]</td></tr><tr><td>Wang 2016</td><td>17</td><td>95</td><td>11</td><td>96</td><td>5.3%</td><td>1.56</td><td>[0.77, 3.16]</td></tr><tr><td>Total (95% CI)</td><td></td><td>535</td><td></td><td>540</td><td>100.0%</td><td>1.02</td><td>[0.91, 1.15]</td><td></td></tr><tr><td colspan="2">Total events</td><td>210</td><td colspan="2">207</td><td colspan="4"></td></tr><tr><td colspan="9">Heterogeneity: Chi² = 6.43, df = 6 (P = 0.38); I² = 7%</td></tr><tr><td colspan="9">Test for overall effect: Z = 0.34 (P = 0.74)</td></tr></table>                                                                                                                                                                                                                                                    | Study or Subgroup | PCT   |        | Control |                    | Weight | Risk Ratio   |            | M-H, Fixed, 95% CI | Events             | Total | Events | Total | M-H, Fixed, 95% CI | Christ-Crain 2004 | 22 | 29 | 18 | 31 | 8.4%  | 1.31 | [0.91, 1.88] |  | Corti 2016   | 60 | 62 | 56 | 58 | 28.0% | 1.00 | [0.94, 1.07] | Liu 2015    | 14 | 44  | 15 | 46  | 7.1%  | 0.98 | [0.54, 1.78] | Schuetz 2009   | 6 | 115 | 11 | 113 | 5.4%   | 0.54 | [0.21, 1.40] | Stolz 2007 | 63           | 102 | 71 | 106 | 33.7% | 0.92 | [0.75, 1.13] | Verduri 2015 | 28 | 88                                                     | 25 | 90 | 12.0% | 1.15 | [0.73, 1.80] | Wang 2016      | 17 | 95  | 11                                           | 96  | 5.3%   | 1.56 | [0.77, 3.16] | Total (95% CI) |              | 535 |    | 540                        | 100.0% | 1.02 | [0.91, 1.15] |  | Total events |                                                        | 210 | 207 |  |  |  |  |  | Heterogeneity: Chi² = 6.43, df = 6 (P = 0.38); I² = 7% |                                              |  |  |  |  |  |  |  | Test for overall effect: Z = 0.34 (P = 0.74) |                            |  |  |  |  |  |  |  |  |
|-------------------------------------------------------------------------------------------------------------------------------------------------------------------------------------------------------------------------------------------------------------------------------------------------------------------------------------------------------------------------------------------------------------------------------------------------------------------------------------------------------------------------------------------------------------------------------------------------------------------------------------------------------------------------------------------------------------------------------------------------------------------------------------------------------------------------------------------------------------------------------------------------------------------------------------------------------------------------------------------------------------------------------------------------------------------------------------------------------------------------------------------------------------------------------------------------------------------------------------------------------------------------------------------------------------------------------------------------------------------------------------------------------------------------------------------------------------------------------------------------------------------------------------------------------------------------------------------------------------------------------------------------------------------------------------------------------------------------------------------------------------------------------------------------------------------------------------------------------------------------------|-------------------|-------|--------|---------|--------------------|--------|--------------|------------|--------------------|--------------------|-------|--------|-------|--------------------|-------------------|----|----|----|----|-------|------|--------------|--|--------------|----|----|----|----|-------|------|--------------|-------------|----|-----|----|-----|-------|------|--------------|----------------|---|-----|----|-----|--------|------|--------------|------------|--------------|-----|----|-----|-------|------|--------------|--------------|----|--------------------------------------------------------|----|----|-------|------|--------------|----------------|----|-----|----------------------------------------------|-----|--------|------|--------------|----------------|--------------|-----|----|----------------------------|--------|------|--------------|--|--------------|--------------------------------------------------------|-----|-----|--|--|--|--|--|--------------------------------------------------------|----------------------------------------------|--|--|--|--|--|--|--|----------------------------------------------|----------------------------|--|--|--|--|--|--|--|--|
| Study or Subgroup                                                                                                                                                                                                                                                                                                                                                                                                                                                                                                                                                                                                                                                                                                                                                                                                                                                                                                                                                                                                                                                                                                                                                                                                                                                                                                                                                                                                                                                                                                                                                                                                                                                                                                                                                                                                                                                             |                   | PCT   |        | Control |                    |        | Weight       | Risk Ratio |                    | M-H, Fixed, 95% CI |       |        |       |                    |                   |    |    |    |    |       |      |              |  |              |    |    |    |    |       |      |              |             |    |     |    |     |       |      |              |                |   |     |    |     |        |      |              |            |              |     |    |     |       |      |              |              |    |                                                        |    |    |       |      |              |                |    |     |                                              |     |        |      |              |                |              |     |    |                            |        |      |              |  |              |                                                        |     |     |  |  |  |  |  |                                                        |                                              |  |  |  |  |  |  |  |                                              |                            |  |  |  |  |  |  |  |  |
|                                                                                                                                                                                                                                                                                                                                                                                                                                                                                                                                                                                                                                                                                                                                                                                                                                                                                                                                                                                                                                                                                                                                                                                                                                                                                                                                                                                                                                                                                                                                                                                                                                                                                                                                                                                                                                                                               | Events            | Total | Events | Total   | M-H, Fixed, 95% CI |        |              |            |                    |                    |       |        |       |                    |                   |    |    |    |    |       |      |              |  |              |    |    |    |    |       |      |              |             |    |     |    |     |       |      |              |                |   |     |    |     |        |      |              |            |              |     |    |     |       |      |              |              |    |                                                        |    |    |       |      |              |                |    |     |                                              |     |        |      |              |                |              |     |    |                            |        |      |              |  |              |                                                        |     |     |  |  |  |  |  |                                                        |                                              |  |  |  |  |  |  |  |                                              |                            |  |  |  |  |  |  |  |  |
| Christ-Crain 2004                                                                                                                                                                                                                                                                                                                                                                                                                                                                                                                                                                                                                                                                                                                                                                                                                                                                                                                                                                                                                                                                                                                                                                                                                                                                                                                                                                                                                                                                                                                                                                                                                                                                                                                                                                                                                                                             | 22                | 29    | 18     | 31      | 8.4%               | 1.31   | [0.91, 1.88] |            |                    |                    |       |        |       |                    |                   |    |    |    |    |       |      |              |  |              |    |    |    |    |       |      |              |             |    |     |    |     |       |      |              |                |   |     |    |     |        |      |              |            |              |     |    |     |       |      |              |              |    |                                                        |    |    |       |      |              |                |    |     |                                              |     |        |      |              |                |              |     |    |                            |        |      |              |  |              |                                                        |     |     |  |  |  |  |  |                                                        |                                              |  |  |  |  |  |  |  |                                              |                            |  |  |  |  |  |  |  |  |
| Corti 2016                                                                                                                                                                                                                                                                                                                                                                                                                                                                                                                                                                                                                                                                                                                                                                                                                                                                                                                                                                                                                                                                                                                                                                                                                                                                                                                                                                                                                                                                                                                                                                                                                                                                                                                                                                                                                                                                    | 60                | 62    | 56     | 58      | 28.0%              | 1.00   | [0.94, 1.07] |            |                    |                    |       |        |       |                    |                   |    |    |    |    |       |      |              |  |              |    |    |    |    |       |      |              |             |    |     |    |     |       |      |              |                |   |     |    |     |        |      |              |            |              |     |    |     |       |      |              |              |    |                                                        |    |    |       |      |              |                |    |     |                                              |     |        |      |              |                |              |     |    |                            |        |      |              |  |              |                                                        |     |     |  |  |  |  |  |                                                        |                                              |  |  |  |  |  |  |  |                                              |                            |  |  |  |  |  |  |  |  |
| Liu 2015                                                                                                                                                                                                                                                                                                                                                                                                                                                                                                                                                                                                                                                                                                                                                                                                                                                                                                                                                                                                                                                                                                                                                                                                                                                                                                                                                                                                                                                                                                                                                                                                                                                                                                                                                                                                                                                                      | 14                | 44    | 15     | 46      | 7.1%               | 0.98   | [0.54, 1.78] |            |                    |                    |       |        |       |                    |                   |    |    |    |    |       |      |              |  |              |    |    |    |    |       |      |              |             |    |     |    |     |       |      |              |                |   |     |    |     |        |      |              |            |              |     |    |     |       |      |              |              |    |                                                        |    |    |       |      |              |                |    |     |                                              |     |        |      |              |                |              |     |    |                            |        |      |              |  |              |                                                        |     |     |  |  |  |  |  |                                                        |                                              |  |  |  |  |  |  |  |                                              |                            |  |  |  |  |  |  |  |  |
| Schuetz 2009                                                                                                                                                                                                                                                                                                                                                                                                                                                                                                                                                                                                                                                                                                                                                                                                                                                                                                                                                                                                                                                                                                                                                                                                                                                                                                                                                                                                                                                                                                                                                                                                                                                                                                                                                                                                                                                                  | 6                 | 115   | 11     | 113     | 5.4%               | 0.54   | [0.21, 1.40] |            |                    |                    |       |        |       |                    |                   |    |    |    |    |       |      |              |  |              |    |    |    |    |       |      |              |             |    |     |    |     |       |      |              |                |   |     |    |     |        |      |              |            |              |     |    |     |       |      |              |              |    |                                                        |    |    |       |      |              |                |    |     |                                              |     |        |      |              |                |              |     |    |                            |        |      |              |  |              |                                                        |     |     |  |  |  |  |  |                                                        |                                              |  |  |  |  |  |  |  |                                              |                            |  |  |  |  |  |  |  |  |
| Stolz 2007                                                                                                                                                                                                                                                                                                                                                                                                                                                                                                                                                                                                                                                                                                                                                                                                                                                                                                                                                                                                                                                                                                                                                                                                                                                                                                                                                                                                                                                                                                                                                                                                                                                                                                                                                                                                                                                                    | 63                | 102   | 71     | 106     | 33.7%              | 0.92   | [0.75, 1.13] |            |                    |                    |       |        |       |                    |                   |    |    |    |    |       |      |              |  |              |    |    |    |    |       |      |              |             |    |     |    |     |       |      |              |                |   |     |    |     |        |      |              |            |              |     |    |     |       |      |              |              |    |                                                        |    |    |       |      |              |                |    |     |                                              |     |        |      |              |                |              |     |    |                            |        |      |              |  |              |                                                        |     |     |  |  |  |  |  |                                                        |                                              |  |  |  |  |  |  |  |                                              |                            |  |  |  |  |  |  |  |  |
| Verduri 2015                                                                                                                                                                                                                                                                                                                                                                                                                                                                                                                                                                                                                                                                                                                                                                                                                                                                                                                                                                                                                                                                                                                                                                                                                                                                                                                                                                                                                                                                                                                                                                                                                                                                                                                                                                                                                                                                  | 28                | 88    | 25     | 90      | 12.0%              | 1.15   | [0.73, 1.80] |            |                    |                    |       |        |       |                    |                   |    |    |    |    |       |      |              |  |              |    |    |    |    |       |      |              |             |    |     |    |     |       |      |              |                |   |     |    |     |        |      |              |            |              |     |    |     |       |      |              |              |    |                                                        |    |    |       |      |              |                |    |     |                                              |     |        |      |              |                |              |     |    |                            |        |      |              |  |              |                                                        |     |     |  |  |  |  |  |                                                        |                                              |  |  |  |  |  |  |  |                                              |                            |  |  |  |  |  |  |  |  |
| Wang 2016                                                                                                                                                                                                                                                                                                                                                                                                                                                                                                                                                                                                                                                                                                                                                                                                                                                                                                                                                                                                                                                                                                                                                                                                                                                                                                                                                                                                                                                                                                                                                                                                                                                                                                                                                                                                                                                                     | 17                | 95    | 11     | 96      | 5.3%               | 1.56   | [0.77, 3.16] |            |                    |                    |       |        |       |                    |                   |    |    |    |    |       |      |              |  |              |    |    |    |    |       |      |              |             |    |     |    |     |       |      |              |                |   |     |    |     |        |      |              |            |              |     |    |     |       |      |              |              |    |                                                        |    |    |       |      |              |                |    |     |                                              |     |        |      |              |                |              |     |    |                            |        |      |              |  |              |                                                        |     |     |  |  |  |  |  |                                                        |                                              |  |  |  |  |  |  |  |                                              |                            |  |  |  |  |  |  |  |  |
| Total (95% CI)                                                                                                                                                                                                                                                                                                                                                                                                                                                                                                                                                                                                                                                                                                                                                                                                                                                                                                                                                                                                                                                                                                                                                                                                                                                                                                                                                                                                                                                                                                                                                                                                                                                                                                                                                                                                                                                                |                   | 535   |        | 540     | 100.0%             | 1.02   | [0.91, 1.15] |            |                    |                    |       |        |       |                    |                   |    |    |    |    |       |      |              |  |              |    |    |    |    |       |      |              |             |    |     |    |     |       |      |              |                |   |     |    |     |        |      |              |            |              |     |    |     |       |      |              |              |    |                                                        |    |    |       |      |              |                |    |     |                                              |     |        |      |              |                |              |     |    |                            |        |      |              |  |              |                                                        |     |     |  |  |  |  |  |                                                        |                                              |  |  |  |  |  |  |  |                                              |                            |  |  |  |  |  |  |  |  |
| Total events                                                                                                                                                                                                                                                                                                                                                                                                                                                                                                                                                                                                                                                                                                                                                                                                                                                                                                                                                                                                                                                                                                                                                                                                                                                                                                                                                                                                                                                                                                                                                                                                                                                                                                                                                                                                                                                                  |                   | 210   | 207    |         |                    |        |              |            |                    |                    |       |        |       |                    |                   |    |    |    |    |       |      |              |  |              |    |    |    |    |       |      |              |             |    |     |    |     |       |      |              |                |   |     |    |     |        |      |              |            |              |     |    |     |       |      |              |              |    |                                                        |    |    |       |      |              |                |    |     |                                              |     |        |      |              |                |              |     |    |                            |        |      |              |  |              |                                                        |     |     |  |  |  |  |  |                                                        |                                              |  |  |  |  |  |  |  |                                              |                            |  |  |  |  |  |  |  |  |
| Heterogeneity: Chi² = 6.43, df = 6 (P = 0.38); I² = 7%                                                                                                                                                                                                                                                                                                                                                                                                                                                                                                                                                                                                                                                                                                                                                                                                                                                                                                                                                                                                                                                                                                                                                                                                                                                                                                                                                                                                                                                                                                                                                                                                                                                                                                                                                                                                                        |                   |       |        |         |                    |        |              |            |                    |                    |       |        |       |                    |                   |    |    |    |    |       |      |              |  |              |    |    |    |    |       |      |              |             |    |     |    |     |       |      |              |                |   |     |    |     |        |      |              |            |              |     |    |     |       |      |              |              |    |                                                        |    |    |       |      |              |                |    |     |                                              |     |        |      |              |                |              |     |    |                            |        |      |              |  |              |                                                        |     |     |  |  |  |  |  |                                                        |                                              |  |  |  |  |  |  |  |                                              |                            |  |  |  |  |  |  |  |  |
| Test for overall effect: Z = 0.34 (P = 0.74)                                                                                                                                                                                                                                                                                                                                                                                                                                                                                                                                                                                                                                                                                                                                                                                                                                                                                                                                                                                                                                                                                                                                                                                                                                                                                                                                                                                                                                                                                                                                                                                                                                                                                                                                                                                                                                  |                   |       |        |         |                    |        |              |            |                    |                    |       |        |       |                    |                   |    |    |    |    |       |      |              |  |              |    |    |    |    |       |      |              |             |    |     |    |     |       |      |              |                |   |     |    |     |        |      |              |            |              |     |    |     |       |      |              |              |    |                                                        |    |    |       |      |              |                |    |     |                                              |     |        |      |              |                |              |     |    |                            |        |      |              |  |              |                                                        |     |     |  |  |  |  |  |                                                        |                                              |  |  |  |  |  |  |  |                                              |                            |  |  |  |  |  |  |  |  |
| <p><b>Reingreso</b></p> <p>En el análisis conjunto de los datos (6 ECAs, 171 eventos), no se observa una diferencia significativa entre el tratamiento con antibióticos guiado por procalcitonina y el placebo: RR 1.15 (0.88 a 1.50); 25 más por 1000 (de 20 menos a 82 más).</p> <p>La confianza con los resultados es baja (ver tabla de resumen de resultados).</p> <table><tr><th rowspan="2">Study or Subgroup</th><th colspan="2">PCT</th><th colspan="2">Control</th><th rowspan="2">Weight</th><th colspan="2">Risk Ratio</th><th rowspan="2">M-H, Fixed, 95% CI</th></tr><tr><th>Events</th><th>Total</th><th>Events</th><th>Total</th><th>M-H, Fixed, 95% CI</th></tr><tr><td>Christ-Crain 2004</td><td>14</td><td>29</td><td>12</td><td>31</td><td>14.5%</td><td>1.25</td><td>[0.70, 2.23]</td><td rowspan="6"></td></tr><tr><td>Corti 2016</td><td>21</td><td>62</td><td>13</td><td>58</td><td>16.8%</td><td>1.51</td><td>[0.84, 2.73]</td></tr><tr><td>Daubin 2018</td><td>20</td><td>151</td><td>19</td><td>151</td><td>23.8%</td><td>1.05</td><td>[0.59, 1.89]</td></tr><tr><td>Nangla 2012</td><td>0</td><td>50</td><td>1</td><td>50</td><td>1.9%</td><td>0.33</td><td>[0.01, 7.99]</td></tr><tr><td>Stolz 2007</td><td>21</td><td>102</td><td>25</td><td>106</td><td>30.7%</td><td>0.87</td><td>[0.52, 1.46]</td></tr><tr><td>Verduri 2015</td><td>15</td><td>88</td><td>10</td><td>90</td><td>12.4%</td><td>1.53</td><td>[0.73, 3.23]</td></tr><tr><td>Total (95% CI)</td><td></td><td>482</td><td></td><td>486</td><td>100.0%</td><td>1.15</td><td>[0.88, 1.50]</td><td></td></tr><tr><td colspan="2">Total events</td><td>91</td><td colspan="2">80</td><td colspan="4"></td></tr><tr><td colspan="9">Heterogeneity: Chi² = 3.25, df = 5 (P = 0.66); I² = 0%</td></tr><tr><td colspan="9">Test for overall effect: Z = 1.03 (P = 0.30)</td></tr></table> | Study or Subgroup | PCT   |        | Control |                    | Weight | Risk Ratio   |            | M-H, Fixed, 95% CI | Events             | Total | Events | Total | M-H, Fixed, 95% CI | Christ-Crain 2004 | 14 | 29 | 12 | 31 | 14.5% | 1.25 | [0.70, 2.23] |  | Corti 2016   | 21 | 62 | 13 | 58 | 16.8% | 1.51 | [0.84, 2.73] | Daubin 2018 | 20 | 151 | 19 | 151 | 23.8% | 1.05 | [0.59, 1.89] | Nangla 2012    | 0 | 50  | 1  | 50  | 1.9%   | 0.33 | [0.01, 7.99] | Stolz 2007 | 21           | 102 | 25 | 106 | 30.7% | 0.87 | [0.52, 1.46] | Verduri 2015 | 15 | 88                                                     | 10 | 90 | 12.4% | 1.53 | [0.73, 3.23] | Total (95% CI) |    | 482 |                                              | 486 | 100.0% | 1.15 | [0.88, 1.50] |                | Total events |     | 91 | 80                         |        |      |              |  |              | Heterogeneity: Chi² = 3.25, df = 5 (P = 0.66); I² = 0% |     |     |  |  |  |  |  |                                                        | Test for overall effect: Z = 1.03 (P = 0.30) |  |  |  |  |  |  |  |                                              | <p><b>Calidad baja</b></p> |  |  |  |  |  |  |  |  |
| Study or Subgroup                                                                                                                                                                                                                                                                                                                                                                                                                                                                                                                                                                                                                                                                                                                                                                                                                                                                                                                                                                                                                                                                                                                                                                                                                                                                                                                                                                                                                                                                                                                                                                                                                                                                                                                                                                                                                                                             |                   | PCT   |        | Control |                    |        | Weight       | Risk Ratio |                    | M-H, Fixed, 95% CI |       |        |       |                    |                   |    |    |    |    |       |      |              |  |              |    |    |    |    |       |      |              |             |    |     |    |     |       |      |              |                |   |     |    |     |        |      |              |            |              |     |    |     |       |      |              |              |    |                                                        |    |    |       |      |              |                |    |     |                                              |     |        |      |              |                |              |     |    |                            |        |      |              |  |              |                                                        |     |     |  |  |  |  |  |                                                        |                                              |  |  |  |  |  |  |  |                                              |                            |  |  |  |  |  |  |  |  |
|                                                                                                                                                                                                                                                                                                                                                                                                                                                                                                                                                                                                                                                                                                                                                                                                                                                                                                                                                                                                                                                                                                                                                                                                                                                                                                                                                                                                                                                                                                                                                                                                                                                                                                                                                                                                                                                                               | Events            | Total | Events | Total   | M-H, Fixed, 95% CI |        |              |            |                    |                    |       |        |       |                    |                   |    |    |    |    |       |      |              |  |              |    |    |    |    |       |      |              |             |    |     |    |     |       |      |              |                |   |     |    |     |        |      |              |            |              |     |    |     |       |      |              |              |    |                                                        |    |    |       |      |              |                |    |     |                                              |     |        |      |              |                |              |     |    |                            |        |      |              |  |              |                                                        |     |     |  |  |  |  |  |                                                        |                                              |  |  |  |  |  |  |  |                                              |                            |  |  |  |  |  |  |  |  |
| Christ-Crain 2004                                                                                                                                                                                                                                                                                                                                                                                                                                                                                                                                                                                                                                                                                                                                                                                                                                                                                                                                                                                                                                                                                                                                                                                                                                                                                                                                                                                                                                                                                                                                                                                                                                                                                                                                                                                                                                                             | 14                | 29    | 12     | 31      | 14.5%              | 1.25   | [0.70, 2.23] |            |                    |                    |       |        |       |                    |                   |    |    |    |    |       |      |              |  |              |    |    |    |    |       |      |              |             |    |     |    |     |       |      |              |                |   |     |    |     |        |      |              |            |              |     |    |     |       |      |              |              |    |                                                        |    |    |       |      |              |                |    |     |                                              |     |        |      |              |                |              |     |    |                            |        |      |              |  |              |                                                        |     |     |  |  |  |  |  |                                                        |                                              |  |  |  |  |  |  |  |                                              |                            |  |  |  |  |  |  |  |  |
| Corti 2016                                                                                                                                                                                                                                                                                                                                                                                                                                                                                                                                                                                                                                                                                                                                                                                                                                                                                                                                                                                                                                                                                                                                                                                                                                                                                                                                                                                                                                                                                                                                                                                                                                                                                                                                                                                                                                                                    | 21                | 62    | 13     | 58      | 16.8%              | 1.51   | [0.84, 2.73] |            |                    |                    |       |        |       |                    |                   |    |    |    |    |       |      |              |  |              |    |    |    |    |       |      |              |             |    |     |    |     |       |      |              |                |   |     |    |     |        |      |              |            |              |     |    |     |       |      |              |              |    |                                                        |    |    |       |      |              |                |    |     |                                              |     |        |      |              |                |              |     |    |                            |        |      |              |  |              |                                                        |     |     |  |  |  |  |  |                                                        |                                              |  |  |  |  |  |  |  |                                              |                            |  |  |  |  |  |  |  |  |
| Daubin 2018                                                                                                                                                                                                                                                                                                                                                                                                                                                                                                                                                                                                                                                                                                                                                                                                                                                                                                                                                                                                                                                                                                                                                                                                                                                                                                                                                                                                                                                                                                                                                                                                                                                                                                                                                                                                                                                                   | 20                | 151   | 19     | 151     | 23.8%              | 1.05   | [0.59, 1.89] |            |                    |                    |       |        |       |                    |                   |    |    |    |    |       |      |              |  |              |    |    |    |    |       |      |              |             |    |     |    |     |       |      |              |                |   |     |    |     |        |      |              |            |              |     |    |     |       |      |              |              |    |                                                        |    |    |       |      |              |                |    |     |                                              |     |        |      |              |                |              |     |    |                            |        |      |              |  |              |                                                        |     |     |  |  |  |  |  |                                                        |                                              |  |  |  |  |  |  |  |                                              |                            |  |  |  |  |  |  |  |  |
| Nangla 2012                                                                                                                                                                                                                                                                                                                                                                                                                                                                                                                                                                                                                                                                                                                                                                                                                                                                                                                                                                                                                                                                                                                                                                                                                                                                                                                                                                                                                                                                                                                                                                                                                                                                                                                                                                                                                                                                   | 0                 | 50    | 1      | 50      | 1.9%               | 0.33   | [0.01, 7.99] |            |                    |                    |       |        |       |                    |                   |    |    |    |    |       |      |              |  |              |    |    |    |    |       |      |              |             |    |     |    |     |       |      |              |                |   |     |    |     |        |      |              |            |              |     |    |     |       |      |              |              |    |                                                        |    |    |       |      |              |                |    |     |                                              |     |        |      |              |                |              |     |    |                            |        |      |              |  |              |                                                        |     |     |  |  |  |  |  |                                                        |                                              |  |  |  |  |  |  |  |                                              |                            |  |  |  |  |  |  |  |  |
| Stolz 2007                                                                                                                                                                                                                                                                                                                                                                                                                                                                                                                                                                                                                                                                                                                                                                                                                                                                                                                                                                                                                                                                                                                                                                                                                                                                                                                                                                                                                                                                                                                                                                                                                                                                                                                                                                                                                                                                    | 21                | 102   | 25     | 106     | 30.7%              | 0.87   | [0.52, 1.46] |            |                    |                    |       |        |       |                    |                   |    |    |    |    |       |      |              |  |              |    |    |    |    |       |      |              |             |    |     |    |     |       |      |              |                |   |     |    |     |        |      |              |            |              |     |    |     |       |      |              |              |    |                                                        |    |    |       |      |              |                |    |     |                                              |     |        |      |              |                |              |     |    |                            |        |      |              |  |              |                                                        |     |     |  |  |  |  |  |                                                        |                                              |  |  |  |  |  |  |  |                                              |                            |  |  |  |  |  |  |  |  |
| Verduri 2015                                                                                                                                                                                                                                                                                                                                                                                                                                                                                                                                                                                                                                                                                                                                                                                                                                                                                                                                                                                                                                                                                                                                                                                                                                                                                                                                                                                                                                                                                                                                                                                                                                                                                                                                                                                                                                                                  | 15                | 88    | 10     | 90      | 12.4%              | 1.53   | [0.73, 3.23] |            |                    |                    |       |        |       |                    |                   |    |    |    |    |       |      |              |  |              |    |    |    |    |       |      |              |             |    |     |    |     |       |      |              |                |   |     |    |     |        |      |              |            |              |     |    |     |       |      |              |              |    |                                                        |    |    |       |      |              |                |    |     |                                              |     |        |      |              |                |              |     |    |                            |        |      |              |  |              |                                                        |     |     |  |  |  |  |  |                                                        |                                              |  |  |  |  |  |  |  |                                              |                            |  |  |  |  |  |  |  |  |
| Total (95% CI)                                                                                                                                                                                                                                                                                                                                                                                                                                                                                                                                                                                                                                                                                                                                                                                                                                                                                                                                                                                                                                                                                                                                                                                                                                                                                                                                                                                                                                                                                                                                                                                                                                                                                                                                                                                                                                                                |                   | 482   |        | 486     | 100.0%             | 1.15   | [0.88, 1.50] |            |                    |                    |       |        |       |                    |                   |    |    |    |    |       |      |              |  |              |    |    |    |    |       |      |              |             |    |     |    |     |       |      |              |                |   |     |    |     |        |      |              |            |              |     |    |     |       |      |              |              |    |                                                        |    |    |       |      |              |                |    |     |                                              |     |        |      |              |                |              |     |    |                            |        |      |              |  |              |                                                        |     |     |  |  |  |  |  |                                                        |                                              |  |  |  |  |  |  |  |                                              |                            |  |  |  |  |  |  |  |  |
| Total events                                                                                                                                                                                                                                                                                                                                                                                                                                                                                                                                                                                                                                                                                                                                                                                                                                                                                                                                                                                                                                                                                                                                                                                                                                                                                                                                                                                                                                                                                                                                                                                                                                                                                                                                                                                                                                                                  |                   | 91    | 80     |         |                    |        |              |            |                    |                    |       |        |       |                    |                   |    |    |    |    |       |      |              |  |              |    |    |    |    |       |      |              |             |    |     |    |     |       |      |              |                |   |     |    |     |        |      |              |            |              |     |    |     |       |      |              |              |    |                                                        |    |    |       |      |              |                |    |     |                                              |     |        |      |              |                |              |     |    |                            |        |      |              |  |              |                                                        |     |     |  |  |  |  |  |                                                        |                                              |  |  |  |  |  |  |  |                                              |                            |  |  |  |  |  |  |  |  |
| Heterogeneity: Chi² = 3.25, df = 5 (P = 0.66); I² = 0%                                                                                                                                                                                                                                                                                                                                                                                                                                                                                                                                                                                                                                                                                                                                                                                                                                                                                                                                                                                                                                                                                                                                                                                                                                                                                                                                                                                                                                                                                                                                                                                                                                                                                                                                                                                                                        |                   |       |        |         |                    |        |              |            |                    |                    |       |        |       |                    |                   |    |    |    |    |       |      |              |  |              |    |    |    |    |       |      |              |             |    |     |    |     |       |      |              |                |   |     |    |     |        |      |              |            |              |     |    |     |       |      |              |              |    |                                                        |    |    |       |      |              |                |    |     |                                              |     |        |      |              |                |              |     |    |                            |        |      |              |  |              |                                                        |     |     |  |  |  |  |  |                                                        |                                              |  |  |  |  |  |  |  |                                              |                            |  |  |  |  |  |  |  |  |
| Test for overall effect: Z = 1.03 (P = 0.30)                                                                                                                                                                                                                                                                                                                                                                                                                                                                                                                                                                                                                                                                                                                                                                                                                                                                                                                                                                                                                                                                                                                                                                                                                                                                                                                                                                                                                                                                                                                                                                                                                                                                                                                                                                                                                                  |                   |       |        |         |                    |        |              |            |                    |                    |       |        |       |                    |                   |    |    |    |    |       |      |              |  |              |    |    |    |    |       |      |              |             |    |     |    |     |       |      |              |                |   |     |    |     |        |      |              |            |              |     |    |     |       |      |              |              |    |                                                        |    |    |       |      |              |                |    |     |                                              |     |        |      |              |                |              |     |    |                            |        |      |              |  |              |                                                        |     |     |  |  |  |  |  |                                                        |                                              |  |  |  |  |  |  |  |                                              |                            |  |  |  |  |  |  |  |  |
| <p><b>Reingreso debido a agudización</b></p> <p>En el análisis conjunto de los datos (3 ECAs, 66 eventos), no se observa una diferencia significativa entre el tratamiento con antibióticos guiado por procalcitonina y el placebo: RR 1.34 (0.85 a 2.10); 39 más por 1000 (de 17 menos a 126 más).</p> <p>La confianza con los resultados es baja (ver tabla de resumen de resultados).</p> <table><tr><th rowspan="2">Study or Subgroup</th><th colspan="2">PCT</th><th colspan="2">Control</th><th rowspan="2">Weight</th><th colspan="2">Risk Ratio</th><th rowspan="2">M-H, Fixed, 95% CI</th></tr><tr><th>Events</th><th>Total</th><th>Events</th><th>Total</th><th>M-H, Fixed, 95% CI</th></tr><tr><td>Corti 2016</td><td>12</td><td>62</td><td>12</td><td>58</td><td>43.9%</td><td>0.94</td><td>[0.46, 1.91]</td><td rowspan="3"></td></tr><tr><td>Verduri 2015</td><td>13</td><td>88</td><td>8</td><td>90</td><td>28.0%</td><td>1.66</td><td>[0.72, 3.81]</td></tr><tr><td>Wang 2016</td><td>13</td><td>95</td><td>8</td><td>96</td><td>28.2%</td><td>1.64</td><td>[0.71, 3.78]</td></tr><tr><td>Total (95% CI)</td><td></td><td>245</td><td></td><td>244</td><td>100.0%</td><td>1.34</td><td>[0.85, 2.10]</td><td></td></tr><tr><td colspan="2">Total events</td><td>38</td><td colspan="2">28</td><td colspan="4"></td></tr><tr><td colspan="9">Heterogeneity: Chi² = 1.45, df = 2 (P = 0.48); I² = 0%</td></tr><tr><td colspan="9">Test for overall effect: Z = 1.26 (P = 0.21)</td></tr></table>                                                                                                                                                                                                                                                                                                                                                                 | Study or Subgroup | PCT   |        | Control |                    | Weight | Risk Ratio   |            | M-H, Fixed, 95% CI | Events             | Total | Events | Total | M-H, Fixed, 95% CI | Corti 2016        | 12 | 62 | 12 | 58 | 43.9% | 0.94 | [0.46, 1.91] |  | Verduri 2015 | 13 | 88 | 8  | 90 | 28.0% | 1.66 | [0.72, 3.81] | Wang 2016   | 13 | 95  | 8  | 96  | 28.2% | 1.64 | [0.71, 3.78] | Total (95% CI) |   | 245 |    | 244 | 100.0% | 1.34 | [0.85, 2.10] |            | Total events |     | 38 | 28  |       |      |              |              |    | Heterogeneity: Chi² = 1.45, df = 2 (P = 0.48); I² = 0% |    |    |       |      |              |                |    |     | Test for overall effect: Z = 1.26 (P = 0.21) |     |        |      |              |                |              |     |    | <p><b>Calidad baja</b></p> |        |      |              |  |              |                                                        |     |     |  |  |  |  |  |                                                        |                                              |  |  |  |  |  |  |  |                                              |                            |  |  |  |  |  |  |  |  |
| Study or Subgroup                                                                                                                                                                                                                                                                                                                                                                                                                                                                                                                                                                                                                                                                                                                                                                                                                                                                                                                                                                                                                                                                                                                                                                                                                                                                                                                                                                                                                                                                                                                                                                                                                                                                                                                                                                                                                                                             |                   | PCT   |        | Control |                    |        | Weight       | Risk Ratio |                    | M-H, Fixed, 95% CI |       |        |       |                    |                   |    |    |    |    |       |      |              |  |              |    |    |    |    |       |      |              |             |    |     |    |     |       |      |              |                |   |     |    |     |        |      |              |            |              |     |    |     |       |      |              |              |    |                                                        |    |    |       |      |              |                |    |     |                                              |     |        |      |              |                |              |     |    |                            |        |      |              |  |              |                                                        |     |     |  |  |  |  |  |                                                        |                                              |  |  |  |  |  |  |  |                                              |                            |  |  |  |  |  |  |  |  |
|                                                                                                                                                                                                                                                                                                                                                                                                                                                                                                                                                                                                                                                                                                                                                                                                                                                                                                                                                                                                                                                                                                                                                                                                                                                                                                                                                                                                                                                                                                                                                                                                                                                                                                                                                                                                                                                                               | Events            | Total | Events | Total   | M-H, Fixed, 95% CI |        |              |            |                    |                    |       |        |       |                    |                   |    |    |    |    |       |      |              |  |              |    |    |    |    |       |      |              |             |    |     |    |     |       |      |              |                |   |     |    |     |        |      |              |            |              |     |    |     |       |      |              |              |    |                                                        |    |    |       |      |              |                |    |     |                                              |     |        |      |              |                |              |     |    |                            |        |      |              |  |              |                                                        |     |     |  |  |  |  |  |                                                        |                                              |  |  |  |  |  |  |  |                                              |                            |  |  |  |  |  |  |  |  |
| Corti 2016                                                                                                                                                                                                                                                                                                                                                                                                                                                                                                                                                                                                                                                                                                                                                                                                                                                                                                                                                                                                                                                                                                                                                                                                                                                                                                                                                                                                                                                                                                                                                                                                                                                                                                                                                                                                                                                                    | 12                | 62    | 12     | 58      | 43.9%              | 0.94   | [0.46, 1.91] |            |                    |                    |       |        |       |                    |                   |    |    |    |    |       |      |              |  |              |    |    |    |    |       |      |              |             |    |     |    |     |       |      |              |                |   |     |    |     |        |      |              |            |              |     |    |     |       |      |              |              |    |                                                        |    |    |       |      |              |                |    |     |                                              |     |        |      |              |                |              |     |    |                            |        |      |              |  |              |                                                        |     |     |  |  |  |  |  |                                                        |                                              |  |  |  |  |  |  |  |                                              |                            |  |  |  |  |  |  |  |  |
| Verduri 2015                                                                                                                                                                                                                                                                                                                                                                                                                                                                                                                                                                                                                                                                                                                                                                                                                                                                                                                                                                                                                                                                                                                                                                                                                                                                                                                                                                                                                                                                                                                                                                                                                                                                                                                                                                                                                                                                  | 13                | 88    | 8      | 90      | 28.0%              | 1.66   | [0.72, 3.81] |            |                    |                    |       |        |       |                    |                   |    |    |    |    |       |      |              |  |              |    |    |    |    |       |      |              |             |    |     |    |     |       |      |              |                |   |     |    |     |        |      |              |            |              |     |    |     |       |      |              |              |    |                                                        |    |    |       |      |              |                |    |     |                                              |     |        |      |              |                |              |     |    |                            |        |      |              |  |              |                                                        |     |     |  |  |  |  |  |                                                        |                                              |  |  |  |  |  |  |  |                                              |                            |  |  |  |  |  |  |  |  |
| Wang 2016                                                                                                                                                                                                                                                                                                                                                                                                                                                                                                                                                                                                                                                                                                                                                                                                                                                                                                                                                                                                                                                                                                                                                                                                                                                                                                                                                                                                                                                                                                                                                                                                                                                                                                                                                                                                                                                                     | 13                | 95    | 8      | 96      | 28.2%              | 1.64   | [0.71, 3.78] |            |                    |                    |       |        |       |                    |                   |    |    |    |    |       |      |              |  |              |    |    |    |    |       |      |              |             |    |     |    |     |       |      |              |                |   |     |    |     |        |      |              |            |              |     |    |     |       |      |              |              |    |                                                        |    |    |       |      |              |                |    |     |                                              |     |        |      |              |                |              |     |    |                            |        |      |              |  |              |                                                        |     |     |  |  |  |  |  |                                                        |                                              |  |  |  |  |  |  |  |                                              |                            |  |  |  |  |  |  |  |  |
| Total (95% CI)                                                                                                                                                                                                                                                                                                                                                                                                                                                                                                                                                                                                                                                                                                                                                                                                                                                                                                                                                                                                                                                                                                                                                                                                                                                                                                                                                                                                                                                                                                                                                                                                                                                                                                                                                                                                                                                                |                   | 245   |        | 244     | 100.0%             | 1.34   | [0.85, 2.10] |            |                    |                    |       |        |       |                    |                   |    |    |    |    |       |      |              |  |              |    |    |    |    |       |      |              |             |    |     |    |     |       |      |              |                |   |     |    |     |        |      |              |            |              |     |    |     |       |      |              |              |    |                                                        |    |    |       |      |              |                |    |     |                                              |     |        |      |              |                |              |     |    |                            |        |      |              |  |              |                                                        |     |     |  |  |  |  |  |                                                        |                                              |  |  |  |  |  |  |  |                                              |                            |  |  |  |  |  |  |  |  |
| Total events                                                                                                                                                                                                                                                                                                                                                                                                                                                                                                                                                                                                                                                                                                                                                                                                                                                                                                                                                                                                                                                                                                                                                                                                                                                                                                                                                                                                                                                                                                                                                                                                                                                                                                                                                                                                                                                                  |                   | 38    | 28     |         |                    |        |              |            |                    |                    |       |        |       |                    |                   |    |    |    |    |       |      |              |  |              |    |    |    |    |       |      |              |             |    |     |    |     |       |      |              |                |   |     |    |     |        |      |              |            |              |     |    |     |       |      |              |              |    |                                                        |    |    |       |      |              |                |    |     |                                              |     |        |      |              |                |              |     |    |                            |        |      |              |  |              |                                                        |     |     |  |  |  |  |  |                                                        |                                              |  |  |  |  |  |  |  |                                              |                            |  |  |  |  |  |  |  |  |
| Heterogeneity: Chi² = 1.45, df = 2 (P = 0.48); I² = 0%                                                                                                                                                                                                                                                                                                                                                                                                                                                                                                                                                                                                                                                                                                                                                                                                                                                                                                                                                                                                                                                                                                                                                                                                                                                                                                                                                                                                                                                                                                                                                                                                                                                                                                                                                                                                                        |                   |       |        |         |                    |        |              |            |                    |                    |       |        |       |                    |                   |    |    |    |    |       |      |              |  |              |    |    |    |    |       |      |              |             |    |     |    |     |       |      |              |                |   |     |    |     |        |      |              |            |              |     |    |     |       |      |              |              |    |                                                        |    |    |       |      |              |                |    |     |                                              |     |        |      |              |                |              |     |    |                            |        |      |              |  |              |                                                        |     |     |  |  |  |  |  |                                                        |                                              |  |  |  |  |  |  |  |                                              |                            |  |  |  |  |  |  |  |  |
| Test for overall effect: Z = 1.26 (P = 0.21)                                                                                                                                                                                                                                                                                                                                                                                                                                                                                                                                                                                                                                                                                                                                                                                                                                                                                                                                                                                                                                                                                                                                                                                                                                                                                                                                                                                                                                                                                                                                                                                                                                                                                                                                                                                                                                  |                   |       |        |         |                    |        |              |            |                    |                    |       |        |       |                    |                   |    |    |    |    |       |      |              |  |              |    |    |    |    |       |      |              |             |    |     |    |     |       |      |              |                |   |     |    |     |        |      |              |            |              |     |    |     |       |      |              |              |    |                                                        |    |    |       |      |              |                |    |     |                                              |     |        |      |              |                |              |     |    |                            |        |      |              |  |              |                                                        |     |     |  |  |  |  |  |                                                        |                                              |  |  |  |  |  |  |  |                                              |                            |  |  |  |  |  |  |  |  |
| <p><b>Balance entre beneficios y riesgos</b></p> <p>El tratamiento antibiótico guiado por procalcitonina se asocia una menor prescripción de antibióticos y una reducción en la duración de su uso, sin observarse diferencias frente a placebo en la tasa de fracasos terapéuticos, recurrencias, hospitalización o mortalidad.</p>                                                                                                                                                                                                                                                                                                                                                                                                                                                                                                                                                                                                                                                                                                                                                                                                                                                                                                                                                                                                                                                                                                                                                                                                                                                                                                                                                                                                                                                                                                                                          |                   |       |        |         |                    |        |              |            |                    |                    |       |        |       |                    |                   |    |    |    |    |       |      |              |  |              |    |    |    |    |       |      |              |             |    |     |    |     |       |      |              |                |   |     |    |     |        |      |              |            |              |     |    |     |       |      |              |              |    |                                                        |    |    |       |      |              |                |    |     |                                              |     |        |      |              |                |              |     |    |                            |        |      |              |  |              |                                                        |     |     |  |  |  |  |  |                                                        |                                              |  |  |  |  |  |  |  |                                              |                            |  |  |  |  |  |  |  |  |
| <p><b>Calidad global de la evidencia</b></p> <p>La confianza global con los resultados fue BAJA principalmente debido al diseño de los estudios y a la imprecisión de los resultados.</p>                                                                                                                                                                                                                                                                                                                                                                                                                                                                                                                                                                                                                                                                                                                                                                                                                                                                                                                                                                                                                                                                                                                                                                                                                                                                                                                                                                                                                                                                                                                                                                                                                                                                                     |                   |       |        |         |                    |        |              |            |                    |                    |       |        |       |                    |                   |    |    |    |    |       |      |              |  |              |    |    |    |    |       |      |              |             |    |     |    |     |       |      |              |                |   |     |    |     |        |      |              |            |              |     |    |     |       |      |              |              |    |                                                        |    |    |       |      |              |                |    |     |                                              |     |        |      |              |                |              |     |    |                            |        |      |              |  |              |                                                        |     |     |  |  |  |  |  |                                                        |                                              |  |  |  |  |  |  |  |                                              |                            |  |  |  |  |  |  |  |  |
| <p><b>Uso de recursos y costes</b></p> <p>No se identificó ninguna referencia relevante para esta pregunta</p>                                                                                                                                                                                                                                                                                                                                                                                                                                                                                                                                                                                                                                                                                                                                                                                                                                                                                                                                                                                                                                                                                                                                                                                                                                                                                                                                                                                                                                                                                                                                                                                                                                                                                                                                                                |                   |       |        |         |                    |        |              |            |                    |                    |       |        |       |                    |                   |    |    |    |    |       |      |              |  |              |    |    |    |    |       |      |              |             |    |     |    |     |       |      |              |                |   |     |    |     |        |      |              |            |              |     |    |     |       |      |              |              |    |                                                        |    |    |       |      |              |                |    |     |                                              |     |        |      |              |                |              |     |    |                            |        |      |              |  |              |                                                        |     |     |  |  |  |  |  |                                                        |                                              |  |  |  |  |  |  |  |                                              |                            |  |  |  |  |  |  |  |  |
| <p><b>Recomendaciones</b></p> <p>No se sugiere el empleo regular de la procalcitonina para guiar el uso de antibióticos durante la agudización de la EPOC (recomendación débil, calidad de evidencia baja)</p>                                                                                                                                                                                                                                                                                                                                                                                                                                                                                                                                                                                                                                                                                                                                                                                                                                                                                                                                                                                                                                                                                                                                                                                                                                                                                                                                                                                                                                                                                                                                                                                                                                                                |                   |       |        |         |                    |        |              |            |                    |                    |       |        |       |                    |                   |    |    |    |    |       |      |              |  |              |    |    |    |    |       |      |              |             |    |     |    |     |       |      |              |                |   |     |    |     |        |      |              |            |              |     |    |     |       |      |              |              |    |                                                        |    |    |       |      |              |                |    |     |                                              |     |        |      |              |                |              |     |    |                            |        |      |              |  |              |                                                        |     |     |  |  |  |  |  |                                                        |                                              |  |  |  |  |  |  |  |                                              |                            |  |  |  |  |  |  |  |  |

|                         |
|-------------------------|
| <b>Especificaciones</b> |
|-------------------------|

|                                                                                                                                                                                                                                                                                                                          |
|--------------------------------------------------------------------------------------------------------------------------------------------------------------------------------------------------------------------------------------------------------------------------------------------------------------------------|
| La procalcitonina es útil para reducir el consumo de antibióticos. No obstante, su mayor coste, su menor disponibilidad y la posibilidad de contar con parámetros clínicos, como el color del esputo, o biomarcadores de mayor accesibilidad como la PCR, no aconsejan su empleo regular para la agudización de la EPOC. |
|--------------------------------------------------------------------------------------------------------------------------------------------------------------------------------------------------------------------------------------------------------------------------------------------------------------------------|

Pregunta: Determinación de la PCT para guiar la administración de antibióticos en los pacientes con una agudización de la EPOC

| Certainty assessment                 |                    |                    |                |                     |                    |                       | Nº de pacientes            |                  | Efecto                |                                                 | Calidad de la evidencia                                                                        | Importancia |
|--------------------------------------|--------------------|--------------------|----------------|---------------------|--------------------|-----------------------|----------------------------|------------------|-----------------------|-------------------------------------------------|------------------------------------------------------------------------------------------------|-------------|
| Nº de estudios                       | Diseño de estudio  | Riesgo de sesgo    | Inconsistencia | Evidencia indirecta | Imprecisión        | Otras consideraciones | Tratamiento guiado por PCT | placebo          | Relativo (95% CI)     | Absoluto (95% CI)                               |                                                                                                |             |
| Fracaso terapéutico                  |                    |                    |                |                     |                    |                       |                            |                  |                       |                                                 |                                                                                                |             |
| 6                                    | ensayos aleatorios | serio <sup>a</sup> | no es serio    | no es serio         | serio <sup>b</sup> | ninguno               | 83/469 (17.7%)             | 99/473 (20.9%)   | RR 0.85 (0.66 a 1.09) | 31 menos por 1,000 (de 71 menos a 19 más )      |  BAJA       | CRÍTICO     |
| Mortalidad por cualquier causa       |                    |                    |                |                     |                    |                       |                            |                  |                       |                                                 |                                                                                                |             |
| 10                                   | ensayos aleatorios | no es serio        | no es serio    | no es serio         | serio <sup>b</sup> | ninguno               | 58/772 (7.5%)              | 47/783 (6.0%)    | RR 1.25 (0.87 a 1.78) | 15 más por 1,000 (de 8 menos a 47 más )         |  MODERADA   | CRÍTICO     |
| Duración estancia hospitalaria       |                    |                    |                |                     |                    |                       |                            |                  |                       |                                                 |                                                                                                |             |
| 11                                   | ensayos aleatorios | serio <sup>a</sup> | no es serio    | no es serio         | no es serio        | ninguno               | 1037                       | 1042             | -                     | MD 0.03 días menos (1.03 menos a 0.97 más )     |  MODERADA   | IMPORTANTE  |
| Prescripción de antibióticos         |                    |                    |                |                     |                    |                       |                            |                  |                       |                                                 |                                                                                                |             |
| 11                                   | ensayos aleatorios | serio <sup>a</sup> | no es serio    | no es serio         | no es serio        | ninguno               | 436/1048 (41.6%)           | 709/1051 (67.5%) | RR 0.55 (0.42 a 0.72) | 304 menos por 1,000 (de 391 menos a 189 menos ) |  MODERADA   | IMPORTANTE  |
| Duración del tratamiento antibiótico |                    |                    |                |                     |                    |                       |                            |                  |                       |                                                 |                                                                                                |             |
| 8                                    | ensayos aleatorios | serio <sup>a</sup> | no es serio    | no es serio         | no es serio        | ninguno               | 798                        | 804              | -                     | MD 2.54 days menos (4.27 menos a 0.81 menos )   |  MODERADA | IMPORTANTE  |



| Certainty assessment           |                    |                    |                |                     |                    |                       | Nº de pacientes            |                 | Efecto                |                                           | Calidad de la evidencia                                                                  | Importancia |
|--------------------------------|--------------------|--------------------|----------------|---------------------|--------------------|-----------------------|----------------------------|-----------------|-----------------------|-------------------------------------------|------------------------------------------------------------------------------------------|-------------|
| Nº de estudios                 | Diseño de estudio  | Riesgo de sesgo    | Inconsistencia | Evidencia indirecta | Imprecisión        | Otras consideraciones | Tratamiento guiado por PCT | placebo         | Relativo (95% CI)     | Absoluto (95% CI)                         |                                                                                          |             |
| 7                              | ensayos aleatorios | serio <sup>a</sup> | no es serio    | no es serio         | serio <sup>b</sup> | ninguno               | 210/535 (39.3%)            | 207/540 (38.3%) | RR 1.02 (0.91 a 1.15) | 8 más por 1,000 (de 34 menos a 57 más )   |  BAJA | IMPORTANTE  |
| Reingreso                      |                    |                    |                |                     |                    |                       |                            |                 |                       |                                           |                                                                                          |             |
| 6                              | ensayos aleatorios | serio <sup>a</sup> | no es serio    | no es serio         | serio <sup>b</sup> | ninguno               | 91/482 (18.9%)             | 80/486 (16.5%)  | RR 1.15 (0.88 a 1.50) | 25 más por 1,000 (de 20 menos a 82 más )  |  BAJA | IMPORTANTE  |
| Reingreso debido a agudización |                    |                    |                |                     |                    |                       |                            |                 |                       |                                           |                                                                                          |             |
| 3                              | ensayos aleatorios | serio <sup>a</sup> | no es serio    | no es serio         | serio <sup>b</sup> | ninguno               | 38/245 (15.5%)             | 28/244 (11.5%)  | RR 1.34 (0.85 a 2.10) | 39 más por 1,000 (de 17 menos a 126 más ) |  BAJA | IMPORTANTE  |

CI: Intervalo de confianza ; RR: Razón de riesgo; MD: Diferencia media

Explicaciones

a. Ninguno de los estudios presentó un diseño cegado por lo que no se descarta un potencial impacto en los desenlaces subjetivos  
b. Los límites del IC95% no descartan un efecto beneficioso o perjudicial clínicamente relevante.

## PREGUNTA 5

### Pregunta para responder:

#### ¿Se deben prescribir corticoides orales en las agudizaciones?

No se identificó ninguna revisión sistemática (RS) reciente que evaluara directamente la eficacia del tratamiento con corticoesteroides orales en los pacientes con EPOC agudizado.

Una RS Cochrane del año 2014 evaluó la eficacia de los corticoesteroides sistémicos en el tratamiento de las agudizaciones por EPOC. Esta revisión incluye un análisis de subgrupo según los pacientes fueran ambulatorios u hospitalizados. Una guía de práctica clínica posterior sobre el manejo de las exacerbaciones en los pacientes con EPOC que incluyó esta misma pregunta no identificó estudios posteriores así como tampoco una actualización de la literatura hasta 2020. Esta RS identificó 7 ECA en los que se comparó la administración de corticoesteroides orales frente a placebo. Para el propósito de esta pregunta se excluyen los estudios en los que se combinaron las rutas de administración parenteral y oral.

### Revisiones sistemáticas:

1. Walters JAE, Tan DJ, White CJ, Gibson PG, Wood-Baker R, Walters EH. Systemic corticosteroids for acute exacerbations of chronic obstructive pulmonary disease. Cochrane Database of Systematic Reviews 2014, Issue 9. Art. No.: CD001288. DOI: 10.1002/14651858.CD001288.pub4.

### Ensayos clínicos aleatorizados:

1. Aaron SD, Vandemheen KL, Hebert P, Dales R, Stiell IG, Ahuja J, et al. Outpatient oral prednisone after emergency treatment of chronic obstructive pulmonary disease. New England Journal of Medicine 2003;348(26):2618-25.
2. Abroug F, Ouanes-Besbes L, Fkih-Hassen M, Ouanes I, Ayed S, Dachraoui F, et al. Prednisone in COPD exacerbation requiring ventilatory support: an open-label randomised evaluation. European Respiratory Journal 2014;43(3):717-24
3. Cordero PJ, Sole A, Benlloch E, Morales P, Vallterra J, Menendez R, et al. A randomized controlled study of prednisone in outpatients with acute exacerbation of COPD. European Respiratory Journal 1996;9 Suppl 23:110s-1s.
4. Davies L, Angus RM, Calverley PMA. Oral corticosteroids in patients admitted to hospital with exacerbations of chronic obstructive pulmonary disease: a prospective randomised controlled trial. Lancet 1999; 354:456-60.
5. Maltais F, Ostinelli J, Bourbeau J, Tonnel AB, Jacquemet N, Haddon J, et al. Comparison of nebulized budesonide and oral prednisolone with placebo in the treatment of acute exacerbations of chronic obstructive pulmonary disease: a randomized controlled trial. American Journal of Respiratory and Critical Care Medicine 2002;165(5):698-703
6. Thompson W, Nielson C, Carvalho P, Charan N, Crowley J. Controlled trial of oral prednisolone in outpatients with acute COPD exacerbation. American Journal of Respiratory and Critical Care Medicine 1996; 154:407-12.
7. Wood-Baker R, Wilkinson J, Pearce M, Ryan G. A double-blind, randomised, placebo-controlled trial of corticosteroids for acute exacerbations of chronic obstructive pulmonary disease [Abstract]. Australian and New Zealand Journal of Medicine 1998; 28:262.

### Fracaso terapéutico

El análisis conjunto de los datos (5 ECAs, 377 pacientes) mostró una reducción significativa favorable al tratamiento con corticosteroides orales (RR 0.42; IC95% 0.22 a 0.81; 168 eventos menos de 226 a 55 menos por 1000 pacientes tratados).  
La confianza con los resultados es alta (ver tabla de resumen de resultados).

**Calidad  
alta**

| Study or Subgroup                                                                                                                                                                                      | CS Orales  |            | Placebo       |              | Weight | Risk Ratio                |  | Risk Ratio              |  |
|--------------------------------------------------------------------------------------------------------------------------------------------------------------------------------------------------------|------------|------------|---------------|--------------|--------|---------------------------|--|-------------------------|--|
|                                                                                                                                                                                                        | Events     | Total      | Events        | Total        |        | M-H, Random, 95% CI       |  | M-H, Random, 95% CI     |  |
| <b>3.1.1 Ingresados</b>                                                                                                                                                                                |            |            |               |              |        |                           |  |                         |  |
| Davies 1999                                                                                                                                                                                            | 1          | 29         | 5             | 27           | 8.8%   | 0.19 [0.02, 1.49]         |  |                         |  |
| Maltais 2002                                                                                                                                                                                           | 3          | 62         | 8             | 66           | 19.7%  | 0.40 [0.11, 1.44]         |  |                         |  |
| Wood-Baker 1998                                                                                                                                                                                        | 1          | 13         | 4             | 13           | 9.0%   | 0.25 [0.03, 1.95]         |  |                         |  |
| <b>Subtotal (95% CI)</b>                                                                                                                                                                               | <b>104</b> | <b>106</b> | <b>106</b>    | <b>37.5%</b> |        | <b>0.31 [0.12, 0.80]</b>  |  |                         |  |
| Total events                                                                                                                                                                                           | 5          |            | 17            |              |        |                           |  |                         |  |
| Heterogeneity: $\tau^2 = 0.00$ ; $\chi^2 = 0.42$ , $df = 2$ ( $P = 0.81$ ); $I^2 = 0\%$                                                                                                                |            |            |               |              |        |                           |  |                         |  |
| Test for overall effect: $Z = 2.41$ ( $P = 0.02$ )                                                                                                                                                     |            |            |               |              |        |                           |  |                         |  |
| <b>3.1.3 Ambulatorios</b>                                                                                                                                                                              |            |            |               |              |        |                           |  |                         |  |
| Aaron 2003                                                                                                                                                                                             | 19         | 70         | 30            | 70           | 57.2%  | 0.63 [0.40, 1.01]         |  |                         |  |
| Thompson 1996                                                                                                                                                                                          | 0          | 13         | 8             | 14           | 5.3%   | 0.06 [0.00, 0.99]         |  |                         |  |
| <b>Subtotal (95% CI)</b>                                                                                                                                                                               | <b>83</b>  | <b>84</b>  | <b>62.5%</b>  |              |        | <b>0.29 [0.03, 2.88]</b>  |  |                         |  |
| Total events                                                                                                                                                                                           | 19         |            | 38            |              |        |                           |  |                         |  |
| Heterogeneity: $\tau^2 = 2.05$ ; $\chi^2 = 3.02$ , $df = 1$ ( $P = 0.08$ ); $I^2 = 67\%$                                                                                                               |            |            |               |              |        |                           |  |                         |  |
| Test for overall effect: $Z = 1.06$ ( $P = 0.29$ )                                                                                                                                                     |            |            |               |              |        |                           |  |                         |  |
| <b>Total (95% CI)</b>                                                                                                                                                                                  | <b>187</b> | <b>190</b> | <b>100.0%</b> |              |        | <b>0.42 [0.22, 0.81]</b>  |  |                         |  |
| Total events                                                                                                                                                                                           | 24         |            | 55            |              |        |                           |  |                         |  |
| Heterogeneity: $\tau^2 = 0.14$ ; $\chi^2 = 5.09$ , $df = 4$ ( $P = 0.28$ ); $I^2 = 21\%$                                                                                                               |            |            |               |              |        |                           |  |                         |  |
| Test for overall effect: $Z = 2.58$ ( $P = 0.010$ )                                                                                                                                                    |            |            |               |              |        |                           |  |                         |  |
| Test for subgroup differences: $\chi^2 = 0.00$ , $df = 1$ ( $P = 0.96$ ), $I^2 = 0\%$                                                                                                                  |            |            |               |              |        |                           |  |                         |  |
| 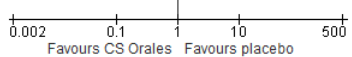                                                                                                                     |            |            |               |              |        |                           |  |                         |  |
| Favours CS Orales Favours placebo                                                                                                                                                                      |            |            |               |              |        |                           |  |                         |  |
| <b>Mortalidad por cualquier causa</b>                                                                                                                                                                  |            |            |               |              |        |                           |  |                         |  |
| En el análisis conjunto de los datos (6 ECAs, 606 pacientes) no mostró diferencias significativas entre el tratamiento con corticosteroides orales y placebo (RR 1.07; IC95% 0.60 a 1.93; 38 eventos). |            |            |               |              |        |                           |  | <b>Calidad moderada</b> |  |
| La confianza con los resultados es moderada (ver tabla de resumen de resultados).                                                                                                                      |            |            |               |              |        |                           |  |                         |  |
| Study or Subgroup                                                                                                                                                                                      | CS Orales  |            | Placebo       |              | Weight | Risk Ratio                |  | Risk Ratio              |  |
|                                                                                                                                                                                                        | Events     | Total      | Events        | Total        |        | M-H, Random, 95% CI       |  | M-H, Random, 95% CI     |  |
| <b>3.4.1 Ingresados</b>                                                                                                                                                                                |            |            |               |              |        |                           |  |                         |  |
| Maltais 2002                                                                                                                                                                                           | 1          | 62         | 0             | 66           | 3.4%   | 3.19 [0.13, 76.88]        |  |                         |  |
| Wood-Baker 1998                                                                                                                                                                                        | 0          | 14         | 1             | 17           | 3.5%   | 0.40 [0.02, 9.12]         |  |                         |  |
| Davies 1999                                                                                                                                                                                            | 1          | 29         | 1             | 27           | 4.7%   | 0.93 [0.06, 14.16]        |  |                         |  |
| <b>Subtotal (95% CI)</b>                                                                                                                                                                               | <b>105</b> | <b>110</b> | <b>11.6%</b>  |              |        | <b>1.03 [0.18, 5.80]</b>  |  |                         |  |
| Total events                                                                                                                                                                                           | 2          |            | 2             |              |        |                           |  |                         |  |
| Heterogeneity: $\tau^2 = 0.00$ ; $\chi^2 = 0.84$ , $df = 2$ ( $P = 0.66$ ); $I^2 = 0\%$                                                                                                                |            |            |               |              |        |                           |  |                         |  |
| Test for overall effect: $Z = 0.04$ ( $P = 0.97$ )                                                                                                                                                     |            |            |               |              |        |                           |  |                         |  |
| <b>3.4.3 UCI</b>                                                                                                                                                                                       |            |            |               |              |        |                           |  |                         |  |
| Abroug 2014                                                                                                                                                                                            | 17         | 111        | 15            | 106          | 83.9%  | 1.08 [0.57, 2.06]         |  |                         |  |
| <b>Subtotal (95% CI)</b>                                                                                                                                                                               | <b>111</b> | <b>106</b> | <b>83.9%</b>  |              |        | <b>1.08 [0.57, 2.06]</b>  |  |                         |  |
| Total events                                                                                                                                                                                           | 17         |            | 15            |              |        |                           |  |                         |  |
| Heterogeneity: Not applicable                                                                                                                                                                          |            |            |               |              |        |                           |  |                         |  |
| Test for overall effect: $Z = 0.24$ ( $P = 0.81$ )                                                                                                                                                     |            |            |               |              |        |                           |  |                         |  |
| <b>3.4.4 Ambulatorios</b>                                                                                                                                                                              |            |            |               |              |        |                           |  |                         |  |
| Thompson 1996                                                                                                                                                                                          | 0          | 13         | 0             | 14           |        | Not estimable             |  |                         |  |
| Aaron 2003                                                                                                                                                                                             | 1          | 74         | 1             | 73           | 4.6%   | 0.99 [0.06, 15.48]        |  |                         |  |
| <b>Subtotal (95% CI)</b>                                                                                                                                                                               | <b>87</b>  | <b>87</b>  | <b>4.6%</b>   |              |        | <b>0.99 [0.06, 15.48]</b> |  |                         |  |
| Total events                                                                                                                                                                                           | 1          |            | 1             |              |        |                           |  |                         |  |
| Heterogeneity: Not applicable                                                                                                                                                                          |            |            |               |              |        |                           |  |                         |  |
| Test for overall effect: $Z = 0.01$ ( $P = 0.99$ )                                                                                                                                                     |            |            |               |              |        |                           |  |                         |  |
| <b>Total (95% CI)</b>                                                                                                                                                                                  | <b>303</b> | <b>303</b> | <b>100.0%</b> |              |        | <b>1.07 [0.60, 1.93]</b>  |  |                         |  |
| Total events                                                                                                                                                                                           | 20         |            | 18            |              |        |                           |  |                         |  |
| Heterogeneity: $\tau^2 = 0.00$ ; $\chi^2 = 0.85$ , $df = 4$ ( $P = 0.93$ ); $I^2 = 0\%$                                                                                                                |            |            |               |              |        |                           |  |                         |  |
| Test for overall effect: $Z = 0.23$ ( $P = 0.82$ )                                                                                                                                                     |            |            |               |              |        |                           |  |                         |  |
| Test for subgroup differences: $\chi^2 = 0.01$ , $df = 2$ ( $P = 1.00$ ), $I^2 = 0\%$                                                                                                                  |            |            |               |              |        |                           |  |                         |  |
|                                                                                                                    |            |            |               |              |        |                           |  |                         |  |
| Favours CS Orales Favours Placebo                                                                                                                                                                      |            |            |               |              |        |                           |  |                         |  |
| <b>Recurrencias</b>                                                                                                                                                                                    |            |            |               |              |        |                           |  |                         |  |
| El análisis conjunto de los datos (2 ECAs, 199 pacientes) no mostró diferencias significativas entre el tratamiento con corticosteroides orales y placebo (RR 0.78; IC95% 0.35 a 1.76; 39 eventos).    |            |            |               |              |        |                           |  | <b>Calidad baja</b>     |  |
| La confianza con los resultados es baja (ver tabla de resumen de resultados).                                                                                                                          |            |            |               |              |        |                           |  |                         |  |

| <p>CS Orales</p> <table><tr><th>Study or Subgroup</th><th>Events</th><th>Total</th><th>Events</th><th>Total</th><th>Weight</th><th>M-H, Random, 95% CI</th><th>Risk Ratio</th><th>M-H, Random, 95% CI</th></tr><tr><td colspan="9">3.3.1 Ingresados</td></tr><tr><td>Davies 1999</td><td>9</td><td>29</td><td>7</td><td>27</td><td>48.6%</td><td>1.20 [0.52, 2.76]</td><td></td><td></td></tr><tr><td>Subtotal (95% CI)</td><td>29</td><td>29</td><td>27</td><td>27</td><td>48.6%</td><td>1.20 [0.52, 2.76]</td><td></td><td></td></tr><tr><td>Total events</td><td>9</td><td></td><td>7</td><td></td><td></td><td></td><td></td><td></td></tr><tr><td colspan="9">Heterogeneity: Not applicable</td></tr><tr><td colspan="9">Test for overall effect: Z = 0.42 (P = 0.67)</td></tr><tr><td colspan="9">3.3.2 Ambulatorios</td></tr><tr><td>Aaron 2003</td><td>8</td><td>72</td><td>15</td><td>71</td><td>51.4%</td><td>0.53 [0.24, 1.16]</td><td></td><td></td></tr><tr><td>Subtotal (95% CI)</td><td>72</td><td>72</td><td>71</td><td>71</td><td>51.4%</td><td>0.53 [0.24, 1.16]</td><td></td><td></td></tr><tr><td>Total events</td><td>8</td><td></td><td>15</td><td></td><td></td><td></td><td></td><td></td></tr><tr><td colspan="9">Heterogeneity: Not applicable</td></tr><tr><td colspan="9">Test for overall effect: Z = 1.59 (P = 0.11)</td></tr><tr><td>Total (95% CI)</td><td>101</td><td></td><td>98</td><td>100.0%</td><td>0.78 [0.35, 1.76]</td><td></td><td></td><td></td></tr><tr><td>Total events</td><td>17</td><td></td><td>22</td><td></td><td></td><td></td><td></td><td></td></tr><tr><td colspan="9">Heterogeneity: Tau<sup>2</sup> = 0.17; Chi<sup>2</sup> = 1.98, df = 1 (P = 0.16); I<sup>2</sup> = 49%</td></tr><tr><td colspan="9">Test for overall effect: Z = 0.59 (P = 0.56)</td></tr><tr><td colspan="9">Test for subgroup differences: Chi<sup>2</sup> = 1.95, df = 1 (P = 0.16), I<sup>2</sup> = 48.8%</td></tr></table> |                   | Study or Subgroup              | Events             | Total             | Events            | Total               | Weight           | M-H, Random, 95% CI | Risk Ratio | M-H, Random, 95% CI | 3.3.1 Ingresados |            |              |              |                    |        |                                |                   |  | Davies 1999       | 9 | 29 | 7      | 27                | 48.6% | 1.20 [0.52, 2.76]             |  |  | Subtotal (95% CI) | 29 | 29 | 27                                           | 27 | 48.6% | 1.20 [0.52, 2.76] |  |  | Total events   | 9 |  | 7      |                   |  |                               |  |  | Heterogeneity: Not applicable |  |  |                                              |  |  |  |  |  | Test for overall effect: Z = 0.42 (P = 0.67)  |  |  |  |  |  |                                |  |  | 3.3.2 Ambulatorios |  |  |  |  |  |  |  |  | Aaron 2003 | 8 | 72 | 15 | 71 | 51.4% | 0.53 [0.24, 1.16] |  |  | Subtotal (95% CI) | 72 | 72 | 71 | 71 | 51.4% | 0.53 [0.24, 1.16] |  |  | Total events | 8 |  | 15 |  |  |  |  |  | Heterogeneity: Not applicable |  |  |  |  |  |  |  |  | Test for overall effect: Z = 1.59 (P = 0.11) |  |  |  |  |  |  |  |  | Total (95% CI) | 101 |  | 98 | 100.0% | 0.78 [0.35, 1.76] |  |  |  | Total events | 17 |  | 22 |  |  |  |  |  | Heterogeneity: Tau <sup>2</sup> = 0.17; Chi <sup>2</sup> = 1.98, df = 1 (P = 0.16); I <sup>2</sup> = 49% |  |  |  |  |  |  |  |  | Test for overall effect: Z = 0.59 (P = 0.56) |  |  |  |  |  |  |  |  | Test for subgroup differences: Chi <sup>2</sup> = 1.95, df = 1 (P = 0.16), I <sup>2</sup> = 48.8% |  |  |  |  |  |  |  |  |  |
|--------------------------------------------------------------------------------------------------------------------------------------------------------------------------------------------------------------------------------------------------------------------------------------------------------------------------------------------------------------------------------------------------------------------------------------------------------------------------------------------------------------------------------------------------------------------------------------------------------------------------------------------------------------------------------------------------------------------------------------------------------------------------------------------------------------------------------------------------------------------------------------------------------------------------------------------------------------------------------------------------------------------------------------------------------------------------------------------------------------------------------------------------------------------------------------------------------------------------------------------------------------------------------------------------------------------------------------------------------------------------------------------------------------------------------------------------------------------------------------------------------------------------------------------------------------------------------------------------------------------------------------------------------------------------------------------------------------------------------------------------------------------------------------------------------------------------------------------------------------------------------------------------------------------------------------------------------------|-------------------|--------------------------------|--------------------|-------------------|-------------------|---------------------|------------------|---------------------|------------|---------------------|------------------|------------|--------------|--------------|--------------------|--------|--------------------------------|-------------------|--|-------------------|---|----|--------|-------------------|-------|-------------------------------|--|--|-------------------|----|----|----------------------------------------------|----|-------|-------------------|--|--|----------------|---|--|--------|-------------------|--|-------------------------------|--|--|-------------------------------|--|--|----------------------------------------------|--|--|--|--|--|-----------------------------------------------|--|--|--|--|--|--------------------------------|--|--|--------------------|--|--|--|--|--|--|--|--|------------|---|----|----|----|-------|-------------------|--|--|-------------------|----|----|----|----|-------|-------------------|--|--|--------------|---|--|----|--|--|--|--|--|-------------------------------|--|--|--|--|--|--|--|--|----------------------------------------------|--|--|--|--|--|--|--|--|----------------|-----|--|----|--------|-------------------|--|--|--|--------------|----|--|----|--|--|--|--|--|----------------------------------------------------------------------------------------------------------|--|--|--|--|--|--|--|--|----------------------------------------------|--|--|--|--|--|--|--|--|---------------------------------------------------------------------------------------------------|--|--|--|--|--|--|--|--|--|
| Study or Subgroup                                                                                                                                                                                                                                                                                                                                                                                                                                                                                                                                                                                                                                                                                                                                                                                                                                                                                                                                                                                                                                                                                                                                                                                                                                                                                                                                                                                                                                                                                                                                                                                                                                                                                                                                                                                                                                                                                                                                            | Events            | Total                          | Events             | Total             | Weight            | M-H, Random, 95% CI | Risk Ratio       | M-H, Random, 95% CI |            |                     |                  |            |              |              |                    |        |                                |                   |  |                   |   |    |        |                   |       |                               |  |  |                   |    |    |                                              |    |       |                   |  |  |                |   |  |        |                   |  |                               |  |  |                               |  |  |                                              |  |  |  |  |  |                                               |  |  |  |  |  |                                |  |  |                    |  |  |  |  |  |  |  |  |            |   |    |    |    |       |                   |  |  |                   |    |    |    |    |       |                   |  |  |              |   |  |    |  |  |  |  |  |                               |  |  |  |  |  |  |  |  |                                              |  |  |  |  |  |  |  |  |                |     |  |    |        |                   |  |  |  |              |    |  |    |  |  |  |  |  |                                                                                                          |  |  |  |  |  |  |  |  |                                              |  |  |  |  |  |  |  |  |                                                                                                   |  |  |  |  |  |  |  |  |  |
| 3.3.1 Ingresados                                                                                                                                                                                                                                                                                                                                                                                                                                                                                                                                                                                                                                                                                                                                                                                                                                                                                                                                                                                                                                                                                                                                                                                                                                                                                                                                                                                                                                                                                                                                                                                                                                                                                                                                                                                                                                                                                                                                             |                   |                                |                    |                   |                   |                     |                  |                     |            |                     |                  |            |              |              |                    |        |                                |                   |  |                   |   |    |        |                   |       |                               |  |  |                   |    |    |                                              |    |       |                   |  |  |                |   |  |        |                   |  |                               |  |  |                               |  |  |                                              |  |  |  |  |  |                                               |  |  |  |  |  |                                |  |  |                    |  |  |  |  |  |  |  |  |            |   |    |    |    |       |                   |  |  |                   |    |    |    |    |       |                   |  |  |              |   |  |    |  |  |  |  |  |                               |  |  |  |  |  |  |  |  |                                              |  |  |  |  |  |  |  |  |                |     |  |    |        |                   |  |  |  |              |    |  |    |  |  |  |  |  |                                                                                                          |  |  |  |  |  |  |  |  |                                              |  |  |  |  |  |  |  |  |                                                                                                   |  |  |  |  |  |  |  |  |  |
| Davies 1999                                                                                                                                                                                                                                                                                                                                                                                                                                                                                                                                                                                                                                                                                                                                                                                                                                                                                                                                                                                                                                                                                                                                                                                                                                                                                                                                                                                                                                                                                                                                                                                                                                                                                                                                                                                                                                                                                                                                                  | 9                 | 29                             | 7                  | 27                | 48.6%             | 1.20 [0.52, 2.76]   |                  |                     |            |                     |                  |            |              |              |                    |        |                                |                   |  |                   |   |    |        |                   |       |                               |  |  |                   |    |    |                                              |    |       |                   |  |  |                |   |  |        |                   |  |                               |  |  |                               |  |  |                                              |  |  |  |  |  |                                               |  |  |  |  |  |                                |  |  |                    |  |  |  |  |  |  |  |  |            |   |    |    |    |       |                   |  |  |                   |    |    |    |    |       |                   |  |  |              |   |  |    |  |  |  |  |  |                               |  |  |  |  |  |  |  |  |                                              |  |  |  |  |  |  |  |  |                |     |  |    |        |                   |  |  |  |              |    |  |    |  |  |  |  |  |                                                                                                          |  |  |  |  |  |  |  |  |                                              |  |  |  |  |  |  |  |  |                                                                                                   |  |  |  |  |  |  |  |  |  |
| Subtotal (95% CI)                                                                                                                                                                                                                                                                                                                                                                                                                                                                                                                                                                                                                                                                                                                                                                                                                                                                                                                                                                                                                                                                                                                                                                                                                                                                                                                                                                                                                                                                                                                                                                                                                                                                                                                                                                                                                                                                                                                                            | 29                | 29                             | 27                 | 27                | 48.6%             | 1.20 [0.52, 2.76]   |                  |                     |            |                     |                  |            |              |              |                    |        |                                |                   |  |                   |   |    |        |                   |       |                               |  |  |                   |    |    |                                              |    |       |                   |  |  |                |   |  |        |                   |  |                               |  |  |                               |  |  |                                              |  |  |  |  |  |                                               |  |  |  |  |  |                                |  |  |                    |  |  |  |  |  |  |  |  |            |   |    |    |    |       |                   |  |  |                   |    |    |    |    |       |                   |  |  |              |   |  |    |  |  |  |  |  |                               |  |  |  |  |  |  |  |  |                                              |  |  |  |  |  |  |  |  |                |     |  |    |        |                   |  |  |  |              |    |  |    |  |  |  |  |  |                                                                                                          |  |  |  |  |  |  |  |  |                                              |  |  |  |  |  |  |  |  |                                                                                                   |  |  |  |  |  |  |  |  |  |
| Total events                                                                                                                                                                                                                                                                                                                                                                                                                                                                                                                                                                                                                                                                                                                                                                                                                                                                                                                                                                                                                                                                                                                                                                                                                                                                                                                                                                                                                                                                                                                                                                                                                                                                                                                                                                                                                                                                                                                                                 | 9                 |                                | 7                  |                   |                   |                     |                  |                     |            |                     |                  |            |              |              |                    |        |                                |                   |  |                   |   |    |        |                   |       |                               |  |  |                   |    |    |                                              |    |       |                   |  |  |                |   |  |        |                   |  |                               |  |  |                               |  |  |                                              |  |  |  |  |  |                                               |  |  |  |  |  |                                |  |  |                    |  |  |  |  |  |  |  |  |            |   |    |    |    |       |                   |  |  |                   |    |    |    |    |       |                   |  |  |              |   |  |    |  |  |  |  |  |                               |  |  |  |  |  |  |  |  |                                              |  |  |  |  |  |  |  |  |                |     |  |    |        |                   |  |  |  |              |    |  |    |  |  |  |  |  |                                                                                                          |  |  |  |  |  |  |  |  |                                              |  |  |  |  |  |  |  |  |                                                                                                   |  |  |  |  |  |  |  |  |  |
| Heterogeneity: Not applicable                                                                                                                                                                                                                                                                                                                                                                                                                                                                                                                                                                                                                                                                                                                                                                                                                                                                                                                                                                                                                                                                                                                                                                                                                                                                                                                                                                                                                                                                                                                                                                                                                                                                                                                                                                                                                                                                                                                                |                   |                                |                    |                   |                   |                     |                  |                     |            |                     |                  |            |              |              |                    |        |                                |                   |  |                   |   |    |        |                   |       |                               |  |  |                   |    |    |                                              |    |       |                   |  |  |                |   |  |        |                   |  |                               |  |  |                               |  |  |                                              |  |  |  |  |  |                                               |  |  |  |  |  |                                |  |  |                    |  |  |  |  |  |  |  |  |            |   |    |    |    |       |                   |  |  |                   |    |    |    |    |       |                   |  |  |              |   |  |    |  |  |  |  |  |                               |  |  |  |  |  |  |  |  |                                              |  |  |  |  |  |  |  |  |                |     |  |    |        |                   |  |  |  |              |    |  |    |  |  |  |  |  |                                                                                                          |  |  |  |  |  |  |  |  |                                              |  |  |  |  |  |  |  |  |                                                                                                   |  |  |  |  |  |  |  |  |  |
| Test for overall effect: Z = 0.42 (P = 0.67)                                                                                                                                                                                                                                                                                                                                                                                                                                                                                                                                                                                                                                                                                                                                                                                                                                                                                                                                                                                                                                                                                                                                                                                                                                                                                                                                                                                                                                                                                                                                                                                                                                                                                                                                                                                                                                                                                                                 |                   |                                |                    |                   |                   |                     |                  |                     |            |                     |                  |            |              |              |                    |        |                                |                   |  |                   |   |    |        |                   |       |                               |  |  |                   |    |    |                                              |    |       |                   |  |  |                |   |  |        |                   |  |                               |  |  |                               |  |  |                                              |  |  |  |  |  |                                               |  |  |  |  |  |                                |  |  |                    |  |  |  |  |  |  |  |  |            |   |    |    |    |       |                   |  |  |                   |    |    |    |    |       |                   |  |  |              |   |  |    |  |  |  |  |  |                               |  |  |  |  |  |  |  |  |                                              |  |  |  |  |  |  |  |  |                |     |  |    |        |                   |  |  |  |              |    |  |    |  |  |  |  |  |                                                                                                          |  |  |  |  |  |  |  |  |                                              |  |  |  |  |  |  |  |  |                                                                                                   |  |  |  |  |  |  |  |  |  |
| 3.3.2 Ambulatorios                                                                                                                                                                                                                                                                                                                                                                                                                                                                                                                                                                                                                                                                                                                                                                                                                                                                                                                                                                                                                                                                                                                                                                                                                                                                                                                                                                                                                                                                                                                                                                                                                                                                                                                                                                                                                                                                                                                                           |                   |                                |                    |                   |                   |                     |                  |                     |            |                     |                  |            |              |              |                    |        |                                |                   |  |                   |   |    |        |                   |       |                               |  |  |                   |    |    |                                              |    |       |                   |  |  |                |   |  |        |                   |  |                               |  |  |                               |  |  |                                              |  |  |  |  |  |                                               |  |  |  |  |  |                                |  |  |                    |  |  |  |  |  |  |  |  |            |   |    |    |    |       |                   |  |  |                   |    |    |    |    |       |                   |  |  |              |   |  |    |  |  |  |  |  |                               |  |  |  |  |  |  |  |  |                                              |  |  |  |  |  |  |  |  |                |     |  |    |        |                   |  |  |  |              |    |  |    |  |  |  |  |  |                                                                                                          |  |  |  |  |  |  |  |  |                                              |  |  |  |  |  |  |  |  |                                                                                                   |  |  |  |  |  |  |  |  |  |
| Aaron 2003                                                                                                                                                                                                                                                                                                                                                                                                                                                                                                                                                                                                                                                                                                                                                                                                                                                                                                                                                                                                                                                                                                                                                                                                                                                                                                                                                                                                                                                                                                                                                                                                                                                                                                                                                                                                                                                                                                                                                   | 8                 | 72                             | 15                 | 71                | 51.4%             | 0.53 [0.24, 1.16]   |                  |                     |            |                     |                  |            |              |              |                    |        |                                |                   |  |                   |   |    |        |                   |       |                               |  |  |                   |    |    |                                              |    |       |                   |  |  |                |   |  |        |                   |  |                               |  |  |                               |  |  |                                              |  |  |  |  |  |                                               |  |  |  |  |  |                                |  |  |                    |  |  |  |  |  |  |  |  |            |   |    |    |    |       |                   |  |  |                   |    |    |    |    |       |                   |  |  |              |   |  |    |  |  |  |  |  |                               |  |  |  |  |  |  |  |  |                                              |  |  |  |  |  |  |  |  |                |     |  |    |        |                   |  |  |  |              |    |  |    |  |  |  |  |  |                                                                                                          |  |  |  |  |  |  |  |  |                                              |  |  |  |  |  |  |  |  |                                                                                                   |  |  |  |  |  |  |  |  |  |
| Subtotal (95% CI)                                                                                                                                                                                                                                                                                                                                                                                                                                                                                                                                                                                                                                                                                                                                                                                                                                                                                                                                                                                                                                                                                                                                                                                                                                                                                                                                                                                                                                                                                                                                                                                                                                                                                                                                                                                                                                                                                                                                            | 72                | 72                             | 71                 | 71                | 51.4%             | 0.53 [0.24, 1.16]   |                  |                     |            |                     |                  |            |              |              |                    |        |                                |                   |  |                   |   |    |        |                   |       |                               |  |  |                   |    |    |                                              |    |       |                   |  |  |                |   |  |        |                   |  |                               |  |  |                               |  |  |                                              |  |  |  |  |  |                                               |  |  |  |  |  |                                |  |  |                    |  |  |  |  |  |  |  |  |            |   |    |    |    |       |                   |  |  |                   |    |    |    |    |       |                   |  |  |              |   |  |    |  |  |  |  |  |                               |  |  |  |  |  |  |  |  |                                              |  |  |  |  |  |  |  |  |                |     |  |    |        |                   |  |  |  |              |    |  |    |  |  |  |  |  |                                                                                                          |  |  |  |  |  |  |  |  |                                              |  |  |  |  |  |  |  |  |                                                                                                   |  |  |  |  |  |  |  |  |  |
| Total events                                                                                                                                                                                                                                                                                                                                                                                                                                                                                                                                                                                                                                                                                                                                                                                                                                                                                                                                                                                                                                                                                                                                                                                                                                                                                                                                                                                                                                                                                                                                                                                                                                                                                                                                                                                                                                                                                                                                                 | 8                 |                                | 15                 |                   |                   |                     |                  |                     |            |                     |                  |            |              |              |                    |        |                                |                   |  |                   |   |    |        |                   |       |                               |  |  |                   |    |    |                                              |    |       |                   |  |  |                |   |  |        |                   |  |                               |  |  |                               |  |  |                                              |  |  |  |  |  |                                               |  |  |  |  |  |                                |  |  |                    |  |  |  |  |  |  |  |  |            |   |    |    |    |       |                   |  |  |                   |    |    |    |    |       |                   |  |  |              |   |  |    |  |  |  |  |  |                               |  |  |  |  |  |  |  |  |                                              |  |  |  |  |  |  |  |  |                |     |  |    |        |                   |  |  |  |              |    |  |    |  |  |  |  |  |                                                                                                          |  |  |  |  |  |  |  |  |                                              |  |  |  |  |  |  |  |  |                                                                                                   |  |  |  |  |  |  |  |  |  |
| Heterogeneity: Not applicable                                                                                                                                                                                                                                                                                                                                                                                                                                                                                                                                                                                                                                                                                                                                                                                                                                                                                                                                                                                                                                                                                                                                                                                                                                                                                                                                                                                                                                                                                                                                                                                                                                                                                                                                                                                                                                                                                                                                |                   |                                |                    |                   |                   |                     |                  |                     |            |                     |                  |            |              |              |                    |        |                                |                   |  |                   |   |    |        |                   |       |                               |  |  |                   |    |    |                                              |    |       |                   |  |  |                |   |  |        |                   |  |                               |  |  |                               |  |  |                                              |  |  |  |  |  |                                               |  |  |  |  |  |                                |  |  |                    |  |  |  |  |  |  |  |  |            |   |    |    |    |       |                   |  |  |                   |    |    |    |    |       |                   |  |  |              |   |  |    |  |  |  |  |  |                               |  |  |  |  |  |  |  |  |                                              |  |  |  |  |  |  |  |  |                |     |  |    |        |                   |  |  |  |              |    |  |    |  |  |  |  |  |                                                                                                          |  |  |  |  |  |  |  |  |                                              |  |  |  |  |  |  |  |  |                                                                                                   |  |  |  |  |  |  |  |  |  |
| Test for overall effect: Z = 1.59 (P = 0.11)                                                                                                                                                                                                                                                                                                                                                                                                                                                                                                                                                                                                                                                                                                                                                                                                                                                                                                                                                                                                                                                                                                                                                                                                                                                                                                                                                                                                                                                                                                                                                                                                                                                                                                                                                                                                                                                                                                                 |                   |                                |                    |                   |                   |                     |                  |                     |            |                     |                  |            |              |              |                    |        |                                |                   |  |                   |   |    |        |                   |       |                               |  |  |                   |    |    |                                              |    |       |                   |  |  |                |   |  |        |                   |  |                               |  |  |                               |  |  |                                              |  |  |  |  |  |                                               |  |  |  |  |  |                                |  |  |                    |  |  |  |  |  |  |  |  |            |   |    |    |    |       |                   |  |  |                   |    |    |    |    |       |                   |  |  |              |   |  |    |  |  |  |  |  |                               |  |  |  |  |  |  |  |  |                                              |  |  |  |  |  |  |  |  |                |     |  |    |        |                   |  |  |  |              |    |  |    |  |  |  |  |  |                                                                                                          |  |  |  |  |  |  |  |  |                                              |  |  |  |  |  |  |  |  |                                                                                                   |  |  |  |  |  |  |  |  |  |
| Total (95% CI)                                                                                                                                                                                                                                                                                                                                                                                                                                                                                                                                                                                                                                                                                                                                                                                                                                                                                                                                                                                                                                                                                                                                                                                                                                                                                                                                                                                                                                                                                                                                                                                                                                                                                                                                                                                                                                                                                                                                               | 101               |                                | 98                 | 100.0%            | 0.78 [0.35, 1.76] |                     |                  |                     |            |                     |                  |            |              |              |                    |        |                                |                   |  |                   |   |    |        |                   |       |                               |  |  |                   |    |    |                                              |    |       |                   |  |  |                |   |  |        |                   |  |                               |  |  |                               |  |  |                                              |  |  |  |  |  |                                               |  |  |  |  |  |                                |  |  |                    |  |  |  |  |  |  |  |  |            |   |    |    |    |       |                   |  |  |                   |    |    |    |    |       |                   |  |  |              |   |  |    |  |  |  |  |  |                               |  |  |  |  |  |  |  |  |                                              |  |  |  |  |  |  |  |  |                |     |  |    |        |                   |  |  |  |              |    |  |    |  |  |  |  |  |                                                                                                          |  |  |  |  |  |  |  |  |                                              |  |  |  |  |  |  |  |  |                                                                                                   |  |  |  |  |  |  |  |  |  |
| Total events                                                                                                                                                                                                                                                                                                                                                                                                                                                                                                                                                                                                                                                                                                                                                                                                                                                                                                                                                                                                                                                                                                                                                                                                                                                                                                                                                                                                                                                                                                                                                                                                                                                                                                                                                                                                                                                                                                                                                 | 17                |                                | 22                 |                   |                   |                     |                  |                     |            |                     |                  |            |              |              |                    |        |                                |                   |  |                   |   |    |        |                   |       |                               |  |  |                   |    |    |                                              |    |       |                   |  |  |                |   |  |        |                   |  |                               |  |  |                               |  |  |                                              |  |  |  |  |  |                                               |  |  |  |  |  |                                |  |  |                    |  |  |  |  |  |  |  |  |            |   |    |    |    |       |                   |  |  |                   |    |    |    |    |       |                   |  |  |              |   |  |    |  |  |  |  |  |                               |  |  |  |  |  |  |  |  |                                              |  |  |  |  |  |  |  |  |                |     |  |    |        |                   |  |  |  |              |    |  |    |  |  |  |  |  |                                                                                                          |  |  |  |  |  |  |  |  |                                              |  |  |  |  |  |  |  |  |                                                                                                   |  |  |  |  |  |  |  |  |  |
| Heterogeneity: Tau <sup>2</sup> = 0.17; Chi <sup>2</sup> = 1.98, df = 1 (P = 0.16); I <sup>2</sup> = 49%                                                                                                                                                                                                                                                                                                                                                                                                                                                                                                                                                                                                                                                                                                                                                                                                                                                                                                                                                                                                                                                                                                                                                                                                                                                                                                                                                                                                                                                                                                                                                                                                                                                                                                                                                                                                                                                     |                   |                                |                    |                   |                   |                     |                  |                     |            |                     |                  |            |              |              |                    |        |                                |                   |  |                   |   |    |        |                   |       |                               |  |  |                   |    |    |                                              |    |       |                   |  |  |                |   |  |        |                   |  |                               |  |  |                               |  |  |                                              |  |  |  |  |  |                                               |  |  |  |  |  |                                |  |  |                    |  |  |  |  |  |  |  |  |            |   |    |    |    |       |                   |  |  |                   |    |    |    |    |       |                   |  |  |              |   |  |    |  |  |  |  |  |                               |  |  |  |  |  |  |  |  |                                              |  |  |  |  |  |  |  |  |                |     |  |    |        |                   |  |  |  |              |    |  |    |  |  |  |  |  |                                                                                                          |  |  |  |  |  |  |  |  |                                              |  |  |  |  |  |  |  |  |                                                                                                   |  |  |  |  |  |  |  |  |  |
| Test for overall effect: Z = 0.59 (P = 0.56)                                                                                                                                                                                                                                                                                                                                                                                                                                                                                                                                                                                                                                                                                                                                                                                                                                                                                                                                                                                                                                                                                                                                                                                                                                                                                                                                                                                                                                                                                                                                                                                                                                                                                                                                                                                                                                                                                                                 |                   |                                |                    |                   |                   |                     |                  |                     |            |                     |                  |            |              |              |                    |        |                                |                   |  |                   |   |    |        |                   |       |                               |  |  |                   |    |    |                                              |    |       |                   |  |  |                |   |  |        |                   |  |                               |  |  |                               |  |  |                                              |  |  |  |  |  |                                               |  |  |  |  |  |                                |  |  |                    |  |  |  |  |  |  |  |  |            |   |    |    |    |       |                   |  |  |                   |    |    |    |    |       |                   |  |  |              |   |  |    |  |  |  |  |  |                               |  |  |  |  |  |  |  |  |                                              |  |  |  |  |  |  |  |  |                |     |  |    |        |                   |  |  |  |              |    |  |    |  |  |  |  |  |                                                                                                          |  |  |  |  |  |  |  |  |                                              |  |  |  |  |  |  |  |  |                                                                                                   |  |  |  |  |  |  |  |  |  |
| Test for subgroup differences: Chi <sup>2</sup> = 1.95, df = 1 (P = 0.16), I <sup>2</sup> = 48.8%                                                                                                                                                                                                                                                                                                                                                                                                                                                                                                                                                                                                                                                                                                                                                                                                                                                                                                                                                                                                                                                                                                                                                                                                                                                                                                                                                                                                                                                                                                                                                                                                                                                                                                                                                                                                                                                            |                   |                                |                    |                   |                   |                     |                  |                     |            |                     |                  |            |              |              |                    |        |                                |                   |  |                   |   |    |        |                   |       |                               |  |  |                   |    |    |                                              |    |       |                   |  |  |                |   |  |        |                   |  |                               |  |  |                               |  |  |                                              |  |  |  |  |  |                                               |  |  |  |  |  |                                |  |  |                    |  |  |  |  |  |  |  |  |            |   |    |    |    |       |                   |  |  |                   |    |    |    |    |       |                   |  |  |              |   |  |    |  |  |  |  |  |                               |  |  |  |  |  |  |  |  |                                              |  |  |  |  |  |  |  |  |                |     |  |    |        |                   |  |  |  |              |    |  |    |  |  |  |  |  |                                                                                                          |  |  |  |  |  |  |  |  |                                              |  |  |  |  |  |  |  |  |                                                                                                   |  |  |  |  |  |  |  |  |  |
| <p><b>Tasa de recurrencias</b></p> <p>Un ECAs, 143 pacientes mostraron una reducción significativa favorable a los corticosteroides orales respecto a placebo en la tasa de recaídas. (HR 0.78; IC95% 0.61 a 0.99).</p> <p>La confianza con los resultados es moderada (ver tabla de resumen de resultados).</p> <table><tr><th>Study or Subgroup</th><th>log[Hazard ratio]</th><th>SE</th><th>Weight</th><th>Hazard ratio</th><th>Hazard ratio</th></tr><tr><td colspan="6">3.2.2 Ambulatorios</td></tr><tr><td>Aaron 2003</td><td>-0.2518</td><td>0.1251</td><td>100.0%</td><td>0.78 [0.61, 0.99]</td><td></td></tr><tr><td>Subtotal (95% CI)</td><td></td><td></td><td>100.0%</td><td>0.78 [0.61, 0.99]</td><td></td></tr><tr><td colspan="6">Heterogeneity: Not applicable</td></tr><tr><td colspan="6">Test for overall effect: Z = 2.01 (P = 0.04)</td></tr><tr><td>Total (95% CI)</td><td></td><td></td><td>100.0%</td><td>0.78 [0.61, 0.99]</td><td></td></tr><tr><td colspan="6">Heterogeneity: Not applicable</td></tr><tr><td colspan="6">Test for overall effect: Z = 2.01 (P = 0.04)</td></tr><tr><td colspan="6">Test for subgroup differences: Not applicable</td></tr></table>                                                                                                                                                                                                                                                                                                                                                                                                                                                                                                                                                                                                                                                                                                                                                               |                   | Study or Subgroup              | log[Hazard ratio]  | SE                | Weight            | Hazard ratio        | Hazard ratio     | 3.2.2 Ambulatorios  |            |                     |                  |            |              | Aaron 2003   | -0.2518            | 0.1251 | 100.0%                         | 0.78 [0.61, 0.99] |  | Subtotal (95% CI) |   |    | 100.0% | 0.78 [0.61, 0.99] |       | Heterogeneity: Not applicable |  |  |                   |    |    | Test for overall effect: Z = 2.01 (P = 0.04) |    |       |                   |  |  | Total (95% CI) |   |  | 100.0% | 0.78 [0.61, 0.99] |  | Heterogeneity: Not applicable |  |  |                               |  |  | Test for overall effect: Z = 2.01 (P = 0.04) |  |  |  |  |  | Test for subgroup differences: Not applicable |  |  |  |  |  | <p><b>Calidad moderada</b></p> |  |  |                    |  |  |  |  |  |  |  |  |            |   |    |    |    |       |                   |  |  |                   |    |    |    |    |       |                   |  |  |              |   |  |    |  |  |  |  |  |                               |  |  |  |  |  |  |  |  |                                              |  |  |  |  |  |  |  |  |                |     |  |    |        |                   |  |  |  |              |    |  |    |  |  |  |  |  |                                                                                                          |  |  |  |  |  |  |  |  |                                              |  |  |  |  |  |  |  |  |                                                                                                   |  |  |  |  |  |  |  |  |  |
| Study or Subgroup                                                                                                                                                                                                                                                                                                                                                                                                                                                                                                                                                                                                                                                                                                                                                                                                                                                                                                                                                                                                                                                                                                                                                                                                                                                                                                                                                                                                                                                                                                                                                                                                                                                                                                                                                                                                                                                                                                                                            | log[Hazard ratio] | SE                             | Weight             | Hazard ratio      | Hazard ratio      |                     |                  |                     |            |                     |                  |            |              |              |                    |        |                                |                   |  |                   |   |    |        |                   |       |                               |  |  |                   |    |    |                                              |    |       |                   |  |  |                |   |  |        |                   |  |                               |  |  |                               |  |  |                                              |  |  |  |  |  |                                               |  |  |  |  |  |                                |  |  |                    |  |  |  |  |  |  |  |  |            |   |    |    |    |       |                   |  |  |                   |    |    |    |    |       |                   |  |  |              |   |  |    |  |  |  |  |  |                               |  |  |  |  |  |  |  |  |                                              |  |  |  |  |  |  |  |  |                |     |  |    |        |                   |  |  |  |              |    |  |    |  |  |  |  |  |                                                                                                          |  |  |  |  |  |  |  |  |                                              |  |  |  |  |  |  |  |  |                                                                                                   |  |  |  |  |  |  |  |  |  |
| 3.2.2 Ambulatorios                                                                                                                                                                                                                                                                                                                                                                                                                                                                                                                                                                                                                                                                                                                                                                                                                                                                                                                                                                                                                                                                                                                                                                                                                                                                                                                                                                                                                                                                                                                                                                                                                                                                                                                                                                                                                                                                                                                                           |                   |                                |                    |                   |                   |                     |                  |                     |            |                     |                  |            |              |              |                    |        |                                |                   |  |                   |   |    |        |                   |       |                               |  |  |                   |    |    |                                              |    |       |                   |  |  |                |   |  |        |                   |  |                               |  |  |                               |  |  |                                              |  |  |  |  |  |                                               |  |  |  |  |  |                                |  |  |                    |  |  |  |  |  |  |  |  |            |   |    |    |    |       |                   |  |  |                   |    |    |    |    |       |                   |  |  |              |   |  |    |  |  |  |  |  |                               |  |  |  |  |  |  |  |  |                                              |  |  |  |  |  |  |  |  |                |     |  |    |        |                   |  |  |  |              |    |  |    |  |  |  |  |  |                                                                                                          |  |  |  |  |  |  |  |  |                                              |  |  |  |  |  |  |  |  |                                                                                                   |  |  |  |  |  |  |  |  |  |
| Aaron 2003                                                                                                                                                                                                                                                                                                                                                                                                                                                                                                                                                                                                                                                                                                                                                                                                                                                                                                                                                                                                                                                                                                                                                                                                                                                                                                                                                                                                                                                                                                                                                                                                                                                                                                                                                                                                                                                                                                                                                   | -0.2518           | 0.1251                         | 100.0%             | 0.78 [0.61, 0.99] |                   |                     |                  |                     |            |                     |                  |            |              |              |                    |        |                                |                   |  |                   |   |    |        |                   |       |                               |  |  |                   |    |    |                                              |    |       |                   |  |  |                |   |  |        |                   |  |                               |  |  |                               |  |  |                                              |  |  |  |  |  |                                               |  |  |  |  |  |                                |  |  |                    |  |  |  |  |  |  |  |  |            |   |    |    |    |       |                   |  |  |                   |    |    |    |    |       |                   |  |  |              |   |  |    |  |  |  |  |  |                               |  |  |  |  |  |  |  |  |                                              |  |  |  |  |  |  |  |  |                |     |  |    |        |                   |  |  |  |              |    |  |    |  |  |  |  |  |                                                                                                          |  |  |  |  |  |  |  |  |                                              |  |  |  |  |  |  |  |  |                                                                                                   |  |  |  |  |  |  |  |  |  |
| Subtotal (95% CI)                                                                                                                                                                                                                                                                                                                                                                                                                                                                                                                                                                                                                                                                                                                                                                                                                                                                                                                                                                                                                                                                                                                                                                                                                                                                                                                                                                                                                                                                                                                                                                                                                                                                                                                                                                                                                                                                                                                                            |                   |                                | 100.0%             | 0.78 [0.61, 0.99] |                   |                     |                  |                     |            |                     |                  |            |              |              |                    |        |                                |                   |  |                   |   |    |        |                   |       |                               |  |  |                   |    |    |                                              |    |       |                   |  |  |                |   |  |        |                   |  |                               |  |  |                               |  |  |                                              |  |  |  |  |  |                                               |  |  |  |  |  |                                |  |  |                    |  |  |  |  |  |  |  |  |            |   |    |    |    |       |                   |  |  |                   |    |    |    |    |       |                   |  |  |              |   |  |    |  |  |  |  |  |                               |  |  |  |  |  |  |  |  |                                              |  |  |  |  |  |  |  |  |                |     |  |    |        |                   |  |  |  |              |    |  |    |  |  |  |  |  |                                                                                                          |  |  |  |  |  |  |  |  |                                              |  |  |  |  |  |  |  |  |                                                                                                   |  |  |  |  |  |  |  |  |  |
| Heterogeneity: Not applicable                                                                                                                                                                                                                                                                                                                                                                                                                                                                                                                                                                                                                                                                                                                                                                                                                                                                                                                                                                                                                                                                                                                                                                                                                                                                                                                                                                                                                                                                                                                                                                                                                                                                                                                                                                                                                                                                                                                                |                   |                                |                    |                   |                   |                     |                  |                     |            |                     |                  |            |              |              |                    |        |                                |                   |  |                   |   |    |        |                   |       |                               |  |  |                   |    |    |                                              |    |       |                   |  |  |                |   |  |        |                   |  |                               |  |  |                               |  |  |                                              |  |  |  |  |  |                                               |  |  |  |  |  |                                |  |  |                    |  |  |  |  |  |  |  |  |            |   |    |    |    |       |                   |  |  |                   |    |    |    |    |       |                   |  |  |              |   |  |    |  |  |  |  |  |                               |  |  |  |  |  |  |  |  |                                              |  |  |  |  |  |  |  |  |                |     |  |    |        |                   |  |  |  |              |    |  |    |  |  |  |  |  |                                                                                                          |  |  |  |  |  |  |  |  |                                              |  |  |  |  |  |  |  |  |                                                                                                   |  |  |  |  |  |  |  |  |  |
| Test for overall effect: Z = 2.01 (P = 0.04)                                                                                                                                                                                                                                                                                                                                                                                                                                                                                                                                                                                                                                                                                                                                                                                                                                                                                                                                                                                                                                                                                                                                                                                                                                                                                                                                                                                                                                                                                                                                                                                                                                                                                                                                                                                                                                                                                                                 |                   |                                |                    |                   |                   |                     |                  |                     |            |                     |                  |            |              |              |                    |        |                                |                   |  |                   |   |    |        |                   |       |                               |  |  |                   |    |    |                                              |    |       |                   |  |  |                |   |  |        |                   |  |                               |  |  |                               |  |  |                                              |  |  |  |  |  |                                               |  |  |  |  |  |                                |  |  |                    |  |  |  |  |  |  |  |  |            |   |    |    |    |       |                   |  |  |                   |    |    |    |    |       |                   |  |  |              |   |  |    |  |  |  |  |  |                               |  |  |  |  |  |  |  |  |                                              |  |  |  |  |  |  |  |  |                |     |  |    |        |                   |  |  |  |              |    |  |    |  |  |  |  |  |                                                                                                          |  |  |  |  |  |  |  |  |                                              |  |  |  |  |  |  |  |  |                                                                                                   |  |  |  |  |  |  |  |  |  |
| Total (95% CI)                                                                                                                                                                                                                                                                                                                                                                                                                                                                                                                                                                                                                                                                                                                                                                                                                                                                                                                                                                                                                                                                                                                                                                                                                                                                                                                                                                                                                                                                                                                                                                                                                                                                                                                                                                                                                                                                                                                                               |                   |                                | 100.0%             | 0.78 [0.61, 0.99] |                   |                     |                  |                     |            |                     |                  |            |              |              |                    |        |                                |                   |  |                   |   |    |        |                   |       |                               |  |  |                   |    |    |                                              |    |       |                   |  |  |                |   |  |        |                   |  |                               |  |  |                               |  |  |                                              |  |  |  |  |  |                                               |  |  |  |  |  |                                |  |  |                    |  |  |  |  |  |  |  |  |            |   |    |    |    |       |                   |  |  |                   |    |    |    |    |       |                   |  |  |              |   |  |    |  |  |  |  |  |                               |  |  |  |  |  |  |  |  |                                              |  |  |  |  |  |  |  |  |                |     |  |    |        |                   |  |  |  |              |    |  |    |  |  |  |  |  |                                                                                                          |  |  |  |  |  |  |  |  |                                              |  |  |  |  |  |  |  |  |                                                                                                   |  |  |  |  |  |  |  |  |  |
| Heterogeneity: Not applicable                                                                                                                                                                                                                                                                                                                                                                                                                                                                                                                                                                                                                                                                                                                                                                                                                                                                                                                                                                                                                                                                                                                                                                                                                                                                                                                                                                                                                                                                                                                                                                                                                                                                                                                                                                                                                                                                                                                                |                   |                                |                    |                   |                   |                     |                  |                     |            |                     |                  |            |              |              |                    |        |                                |                   |  |                   |   |    |        |                   |       |                               |  |  |                   |    |    |                                              |    |       |                   |  |  |                |   |  |        |                   |  |                               |  |  |                               |  |  |                                              |  |  |  |  |  |                                               |  |  |  |  |  |                                |  |  |                    |  |  |  |  |  |  |  |  |            |   |    |    |    |       |                   |  |  |                   |    |    |    |    |       |                   |  |  |              |   |  |    |  |  |  |  |  |                               |  |  |  |  |  |  |  |  |                                              |  |  |  |  |  |  |  |  |                |     |  |    |        |                   |  |  |  |              |    |  |    |  |  |  |  |  |                                                                                                          |  |  |  |  |  |  |  |  |                                              |  |  |  |  |  |  |  |  |                                                                                                   |  |  |  |  |  |  |  |  |  |
| Test for overall effect: Z = 2.01 (P = 0.04)                                                                                                                                                                                                                                                                                                                                                                                                                                                                                                                                                                                                                                                                                                                                                                                                                                                                                                                                                                                                                                                                                                                                                                                                                                                                                                                                                                                                                                                                                                                                                                                                                                                                                                                                                                                                                                                                                                                 |                   |                                |                    |                   |                   |                     |                  |                     |            |                     |                  |            |              |              |                    |        |                                |                   |  |                   |   |    |        |                   |       |                               |  |  |                   |    |    |                                              |    |       |                   |  |  |                |   |  |        |                   |  |                               |  |  |                               |  |  |                                              |  |  |  |  |  |                                               |  |  |  |  |  |                                |  |  |                    |  |  |  |  |  |  |  |  |            |   |    |    |    |       |                   |  |  |                   |    |    |    |    |       |                   |  |  |              |   |  |    |  |  |  |  |  |                               |  |  |  |  |  |  |  |  |                                              |  |  |  |  |  |  |  |  |                |     |  |    |        |                   |  |  |  |              |    |  |    |  |  |  |  |  |                                                                                                          |  |  |  |  |  |  |  |  |                                              |  |  |  |  |  |  |  |  |                                                                                                   |  |  |  |  |  |  |  |  |  |
| Test for subgroup differences: Not applicable                                                                                                                                                                                                                                                                                                                                                                                                                                                                                                                                                                                                                                                                                                                                                                                                                                                                                                                                                                                                                                                                                                                                                                                                                                                                                                                                                                                                                                                                                                                                                                                                                                                                                                                                                                                                                                                                                                                |                   |                                |                    |                   |                   |                     |                  |                     |            |                     |                  |            |              |              |                    |        |                                |                   |  |                   |   |    |        |                   |       |                               |  |  |                   |    |    |                                              |    |       |                   |  |  |                |   |  |        |                   |  |                               |  |  |                               |  |  |                                              |  |  |  |  |  |                                               |  |  |  |  |  |                                |  |  |                    |  |  |  |  |  |  |  |  |            |   |    |    |    |       |                   |  |  |                   |    |    |    |    |       |                   |  |  |              |   |  |    |  |  |  |  |  |                               |  |  |  |  |  |  |  |  |                                              |  |  |  |  |  |  |  |  |                |     |  |    |        |                   |  |  |  |              |    |  |    |  |  |  |  |  |                                                                                                          |  |  |  |  |  |  |  |  |                                              |  |  |  |  |  |  |  |  |                                                                                                   |  |  |  |  |  |  |  |  |  |
| <p><b>Calidad de vida - Chronic Respiratory Disease Questionnaire (CRQ)</b></p> <p>Un ECA (147 pacientes) no muestra diferencias significativas entre el tratamiento con corticosteroides orales y placebo en el estado salud medido con el cuestionario CRQ (Chronic Respiratory Disease Questionnaire) (MD 0.38 puntos más; IC95% 0.68 menos a 1.44 puntos más).</p> <p>La confianza con los resultados es moderada (ver tabla de resumen de resultados).</p> <table><tr><th>Study or Subgroup</th><th>CS Orales</th><th>Placebo</th><th>Mean Difference</th><th>Mean Difference</th></tr><tr><td colspan="5">3.5.1 Ingresados</td></tr><tr><td>Aaron 2003</td><td>1.42 4.43 74</td><td>1.04 1.47 73</td><td>0.38 [-0.68, 1.44]</td><td></td></tr></table>                                                                                                                                                                                                                                                                                                                                                                                                                                                                                                                                                                                                                                                                                                                                                                                                                                                                                                                                                                                                                                                                                                                                                                                                 |                   | Study or Subgroup              | CS Orales          | Placebo           | Mean Difference   | Mean Difference     | 3.5.1 Ingresados |                     |            |                     |                  | Aaron 2003 | 1.42 4.43 74 | 1.04 1.47 73 | 0.38 [-0.68, 1.44] |        | <p><b>Calidad moderada</b></p> |                   |  |                   |   |    |        |                   |       |                               |  |  |                   |    |    |                                              |    |       |                   |  |  |                |   |  |        |                   |  |                               |  |  |                               |  |  |                                              |  |  |  |  |  |                                               |  |  |  |  |  |                                |  |  |                    |  |  |  |  |  |  |  |  |            |   |    |    |    |       |                   |  |  |                   |    |    |    |    |       |                   |  |  |              |   |  |    |  |  |  |  |  |                               |  |  |  |  |  |  |  |  |                                              |  |  |  |  |  |  |  |  |                |     |  |    |        |                   |  |  |  |              |    |  |    |  |  |  |  |  |                                                                                                          |  |  |  |  |  |  |  |  |                                              |  |  |  |  |  |  |  |  |                                                                                                   |  |  |  |  |  |  |  |  |  |
| Study or Subgroup                                                                                                                                                                                                                                                                                                                                                                                                                                                                                                                                                                                                                                                                                                                                                                                                                                                                                                                                                                                                                                                                                                                                                                                                                                                                                                                                                                                                                                                                                                                                                                                                                                                                                                                                                                                                                                                                                                                                            | CS Orales         | Placebo                        | Mean Difference    | Mean Difference   |                   |                     |                  |                     |            |                     |                  |            |              |              |                    |        |                                |                   |  |                   |   |    |        |                   |       |                               |  |  |                   |    |    |                                              |    |       |                   |  |  |                |   |  |        |                   |  |                               |  |  |                               |  |  |                                              |  |  |  |  |  |                                               |  |  |  |  |  |                                |  |  |                    |  |  |  |  |  |  |  |  |            |   |    |    |    |       |                   |  |  |                   |    |    |    |    |       |                   |  |  |              |   |  |    |  |  |  |  |  |                               |  |  |  |  |  |  |  |  |                                              |  |  |  |  |  |  |  |  |                |     |  |    |        |                   |  |  |  |              |    |  |    |  |  |  |  |  |                                                                                                          |  |  |  |  |  |  |  |  |                                              |  |  |  |  |  |  |  |  |                                                                                                   |  |  |  |  |  |  |  |  |  |
| 3.5.1 Ingresados                                                                                                                                                                                                                                                                                                                                                                                                                                                                                                                                                                                                                                                                                                                                                                                                                                                                                                                                                                                                                                                                                                                                                                                                                                                                                                                                                                                                                                                                                                                                                                                                                                                                                                                                                                                                                                                                                                                                             |                   |                                |                    |                   |                   |                     |                  |                     |            |                     |                  |            |              |              |                    |        |                                |                   |  |                   |   |    |        |                   |       |                               |  |  |                   |    |    |                                              |    |       |                   |  |  |                |   |  |        |                   |  |                               |  |  |                               |  |  |                                              |  |  |  |  |  |                                               |  |  |  |  |  |                                |  |  |                    |  |  |  |  |  |  |  |  |            |   |    |    |    |       |                   |  |  |                   |    |    |    |    |       |                   |  |  |              |   |  |    |  |  |  |  |  |                               |  |  |  |  |  |  |  |  |                                              |  |  |  |  |  |  |  |  |                |     |  |    |        |                   |  |  |  |              |    |  |    |  |  |  |  |  |                                                                                                          |  |  |  |  |  |  |  |  |                                              |  |  |  |  |  |  |  |  |                                                                                                   |  |  |  |  |  |  |  |  |  |
| Aaron 2003                                                                                                                                                                                                                                                                                                                                                                                                                                                                                                                                                                                                                                                                                                                                                                                                                                                                                                                                                                                                                                                                                                                                                                                                                                                                                                                                                                                                                                                                                                                                                                                                                                                                                                                                                                                                                                                                                                                                                   | 1.42 4.43 74      | 1.04 1.47 73                   | 0.38 [-0.68, 1.44] |                   |                   |                     |                  |                     |            |                     |                  |            |              |              |                    |        |                                |                   |  |                   |   |    |        |                   |       |                               |  |  |                   |    |    |                                              |    |       |                   |  |  |                |   |  |        |                   |  |                               |  |  |                               |  |  |                                              |  |  |  |  |  |                                               |  |  |  |  |  |                                |  |  |                    |  |  |  |  |  |  |  |  |            |   |    |    |    |       |                   |  |  |                   |    |    |    |    |       |                   |  |  |              |   |  |    |  |  |  |  |  |                               |  |  |  |  |  |  |  |  |                                              |  |  |  |  |  |  |  |  |                |     |  |    |        |                   |  |  |  |              |    |  |    |  |  |  |  |  |                                                                                                          |  |  |  |  |  |  |  |  |                                              |  |  |  |  |  |  |  |  |                                                                                                   |  |  |  |  |  |  |  |  |  |
| <p><b>Duración estancia hospitalaria</b></p> <p>En el análisis conjunto de los datos (2 ECAs, 242 pacientes) no mostró diferencias significativas entre el tratamiento con corticosteroides orales y placebo (MD 0.39 días más; IC95% 1.68 menos a 2.47 días más).</p> <p>La confianza con los resultados es moderada (ver tabla de resumen de resultados).</p>                                                                                                                                                                                                                                                                                                                                                                                                                                                                                                                                                                                                                                                                                                                                                                                                                                                                                                                                                                                                                                                                                                                                                                                                                                                                                                                                                                                                                                                                                                                                                                                              |                   | <p><b>Calidad moderada</b></p> |                    |                   |                   |                     |                  |                     |            |                     |                  |            |              |              |                    |        |                                |                   |  |                   |   |    |        |                   |       |                               |  |  |                   |    |    |                                              |    |       |                   |  |  |                |   |  |        |                   |  |                               |  |  |                               |  |  |                                              |  |  |  |  |  |                                               |  |  |  |  |  |                                |  |  |                    |  |  |  |  |  |  |  |  |            |   |    |    |    |       |                   |  |  |                   |    |    |    |    |       |                   |  |  |              |   |  |    |  |  |  |  |  |                               |  |  |  |  |  |  |  |  |                                              |  |  |  |  |  |  |  |  |                |     |  |    |        |                   |  |  |  |              |    |  |    |  |  |  |  |  |                                                                                                          |  |  |  |  |  |  |  |  |                                              |  |  |  |  |  |  |  |  |                                                                                                   |  |  |  |  |  |  |  |  |  |

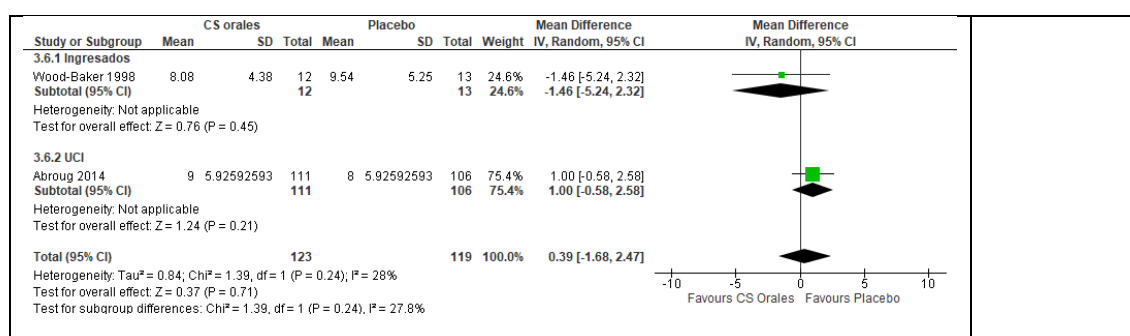

## Duración de la ventilación mecánica

Un ECA, 117 pacientes, no mostró diferencias significativas entre el tratamiento con corticosteroides orales y placebo (MD 0; IC95% 1.6 días menos a 1.6 días más).

La confianza con los resultados es moderada (ver tabla de resumen de resultados).

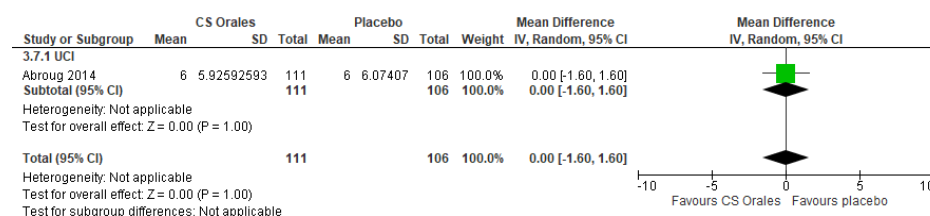

**Calidad  
baja**

## Efectos indeseados - hiperglicemia

En el análisis conjunto de los datos (4 ECAs, 530 pacientes) mostró un incremento significativo de los pacientes con hiperglicemia entre el tratamiento con corticosteroides orales y placebo (RR 2.46; IC95% 1.50 a 4.02; 147 eventos más de 57 a 257 más por 1000 pacientes tratados).

La confianza con los resultados es moderada (ver tabla de resumen de resultados).

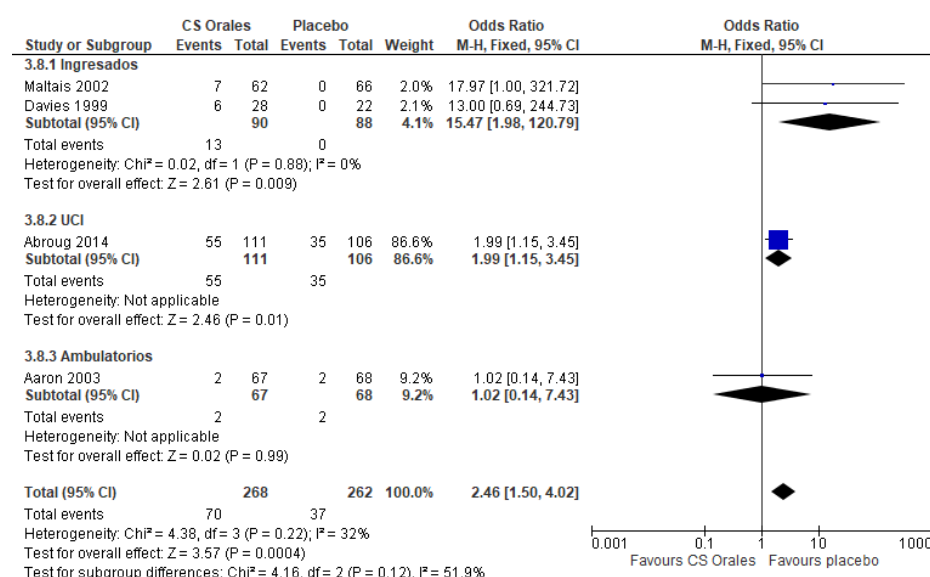

**Calidad  
moderada**

## Balance entre beneficios y riesgos

Los corticoides orales reducen el fracaso terapéutico, la tasa de recurrencias sin impacto en la calidad de vida relacionada con la salud, la duración de la estancia hospitalaria, la duración de la ventilación mecánica o la mortalidad. Por el contrario si que se aprecia un incremento significativo de los pacientes con hiperglicemia.

|                                                                                                                                                                                                                                                                                                                                                                               |
|-------------------------------------------------------------------------------------------------------------------------------------------------------------------------------------------------------------------------------------------------------------------------------------------------------------------------------------------------------------------------------|
| Existen muy pocos datos sobre la eficacia de los corticoides orales en agudizaciones muy graves que cursen con acidosis respiratoria.                                                                                                                                                                                                                                         |
| <b>Calidad global de la evidencia</b>                                                                                                                                                                                                                                                                                                                                         |
| La confianza global con los resultados fue moderada principalmente debido a la imprecisión de los resultados de mortalidad.                                                                                                                                                                                                                                                   |
| <b>Uso de recursos y costes</b>                                                                                                                                                                                                                                                                                                                                               |
| No se identificó ninguna referencia relevante para esta pregunta                                                                                                                                                                                                                                                                                                              |
| <b>Recomendaciones</b>                                                                                                                                                                                                                                                                                                                                                        |
| <p><b>En pacientes ambulatorios:</b><br/>Se sugiere el uso de corticoides orales en pacientes con agudización moderada (recomendación débil, calidad de evidencia moderada)</p> <p><b>En pacientes ingresados:</b><br/>Se recomienda el uso de corticoides orales en pacientes con una agudización grave de la EPOC (recomendación fuerte, calidad de evidencia moderada)</p> |
| <b>Especificaciones</b>                                                                                                                                                                                                                                                                                                                                                       |
| <p>La dosis recomendada de corticoides orales es de 0,5 mg/kg/día de prednisona o equivalente, durante un máximo de 5 días en agudizaciones moderadas y durante un máximo de 12 días en agudizaciones graves.</p> <p>La vía parenteral es preferible para las agudizaciones muy graves</p>                                                                                    |

Pregunta: ¿Se deben prescribir corticoides orales en las agudizaciones de la EPOC?

| Certainty assessment                                                    |                    |                    |                          |                     |                    |                       | Nº de pacientes     |                | Efecto                |                                               | Certainty        | Importancia |
|-------------------------------------------------------------------------|--------------------|--------------------|--------------------------|---------------------|--------------------|-----------------------|---------------------|----------------|-----------------------|-----------------------------------------------|------------------|-------------|
| Nº de estudios                                                          | Diseño de estudio  | Riesgo de sesgo    | Inconsistencia           | Evidencia indirecta | Imprecisión        | Otras consideraciones | Oral corticosteroid | placebo        | Relativo (95% CI)     | Absoluto (95% CI)                             |                  |             |
| Fracaso terapéutico                                                     |                    |                    |                          |                     |                    |                       |                     |                |                       |                                               |                  |             |
| 5                                                                       | ensayos aleatorios | no es serio        | no es serio              | no es serio         | no es serio        | ninguno               | 24/187 (12.8%)      | 55/190 (28.9%) | RR 0.42 (0.22 a 0.81) | 168 menos por 1000 (de 226 menos a 55 menos ) | ⊕⊕⊕⊕<br>ALTA     | CRÍTICO     |
| Mortalidad por cualquier causa                                          |                    |                    |                          |                     |                    |                       |                     |                |                       |                                               |                  |             |
| 6                                                                       | ensayos aleatorios | no es serio        | no es serio              | no es serio         | serio <sup>b</sup> | ninguno               | 20/303 (6.6%)       | 18/303 (5.9%)  | RR 1.07 (0.60 a 1.93) | 4 más por 1000 (de 24 menos a 55 más )        | ⊕⊕⊕○<br>MODERADA | CRÍTICO     |
| Tasa de recaídas (seguimiento a 30 días)                                |                    |                    |                          |                     |                    |                       |                     |                |                       |                                               |                  |             |
| 1                                                                       | ensayos aleatorios | no es serio        | no es serio <sup>a</sup> | no es serio         | serio <sup>b</sup> | ninguno               | 8/72 (11.1%)        | 15/71 (21.1%)  | HR 0.78 (0.61 a 0.99) | 42 menos por 1000 (de 76 menos a 2 menos )    | ⊕⊕⊕○<br>MODERADA | IMPORTANTE  |
| Recaídas                                                                |                    |                    |                          |                     |                    |                       |                     |                |                       |                                               |                  |             |
| 2                                                                       | ensayos aleatorios | no es serio        | serio <sup>c</sup>       | no es serio         | serio <sup>b</sup> | ninguno               | 17/101 (16.8%)      | 22/98 (22.4%)  | RR 0.78 (0.35 a 1.76) | 49 menos por 1000 (de 146 menos a 171 más )   | ⊕⊕○○<br>BAJA     | IMPORTANTE  |
| Chronic Respiratory Disease Questionnaire (CRO) (cambio respecto basal) |                    |                    |                          |                     |                    |                       |                     |                |                       |                                               |                  |             |
| 1                                                                       | ensayos aleatorios | no es serio        | no es serio <sup>a</sup> | no es serio         | serio <sup>d</sup> | ninguno               | 74                  | 73             | -                     | MD 0.38 más (0.68 menos a 1.44 más )          | ⊕⊕⊕○<br>MODERADA | IMPORTANTE  |
| Duración estancia hospitalaria (días)                                   |                    |                    |                          |                     |                    |                       |                     |                |                       |                                               |                  |             |
| 2                                                                       | ensayos aleatorios | no es serio        | no es serio              | no es serio         | serio <sup>d</sup> | ninguno               | 123                 | 119            | -                     | MD 0.39 más (1.68 menos a 2.47 más )          | ⊕⊕⊕○<br>MODERADA | IMPORTANTE  |
| Duración ventilación mecánica (días)                                    |                    |                    |                          |                     |                    |                       |                     |                |                       |                                               |                  |             |
| 1                                                                       | ensayos aleatorios | serio <sup>e</sup> | no es serio <sup>a</sup> | no es serio         | serio <sup>d</sup> | ninguno               | 111                 | 106            | -                     | MD 0 (1.6 menos a 1.6 más )                   | ⊕⊕○○<br>BAJA     | IMPORTANTE  |

Efectos indeseados - hiperglicemia (seguimiento a 30 días)



| Certainty assessment |                    |                 |                    |                     |             |                       | Nº de pacientes     |                | Efecto                   |                                            | Certainty        | Importancia |
|----------------------|--------------------|-----------------|--------------------|---------------------|-------------|-----------------------|---------------------|----------------|--------------------------|--------------------------------------------|------------------|-------------|
| Nº de estudios       | Diseño de estudio  | Riesgo de sesgo | Inconsistencia     | Evidencia indirecta | Imprecisión | Otras consideraciones | Oral corticosteroid | placebo        | Relativo (95% CI)        | Absoluto (95% CI)                          |                  |             |
| 4                    | ensayos aleatorios | no es serio     | serio <sup>c</sup> | no es serio         | no es serio | ninguno               | 70/268 (26.1%)      | 37/262 (14.1%) | OR 2.46<br>(1.50 a 4.02) | 147 más por 1000<br>(de 57 más a 257 más ) | ⊕⊕⊕○<br>MODERADA | IMPORTANTE  |

CI: Intervalo de confianza ; RR: Razón de riesgo; HR: Razón de riesgos instantáneos; MD: Diferencia media; OR: Razón de momios

Explicaciones

- a. Un único estudio
- b. Escaso número de eventos; los límites del IC95% indican un efecto beneficioso o perjudicial relevante
- c. Variabilidad significativa de los resultados entre los distintos estudios incluidos
- d. Los límites inferior o superior del IC95% superan la diferencia mínima clínicamente relevante
- e. Estudio abierto; no se puede descartar un potencial riesgo de sesgo en la evaluación de un desenlace subjetivo

## PREGUNTA 6

**Pregunta para responder:****¿La determinación de los eosinófilos, es útil para guiar la administración de corticosteroides orales en los pacientes con una agudización de la EPOC?**

Para responder a la pregunta de la determinación de eosinófilos para guiar el tratamiento con corticosteroides orales se identificaron dos revisiones, una de ellas narrativa (Bafadhel 2014 y Bruselle 2018). Estas dos revisiones identificaron un estudio que evaluó la relación entre la concentración de eosinófilos y los resultados clínicos del tratamiento con corticosteroides orales (Bafadhel 2012). Posteriormente se identificó un ECA adicional (Sivapalan 2019).

**Revisiones sistemáticas:**

1. Bafadhel M, Davies L, Calverley PM, Aaron SD, Brightling CE, Pavord ID. Blood eosinophil guided prednisolone therapy for exacerbations of COPD: a further analysis. *Eur Respir J* 2014; 44: 789–91
2. Brusselle G, Pavord ID, Landis S, Pascoe S, Lettis S, Morjaria N, Barnes N, Hilton E. Blood eosinophil levels as a biomarker in COPD. *Respir Med*. 2018 May;138:21

**Ensayos clínicos aleatorizados:**

1. Bafadhel M, McKenna S, Terry S, et al. Blood eosinophils to direct corticosteroid treatment of exacerbations of chronic obstructive pulmonary disease: a randomized placebo-controlled trial. *Am J Respir Crit Care Med* 2012; 186: 48–55.
2. Sivapalan P, Lapperre TS, Janner J, Laub RR, Moberg M, Bech CS, Eklöf J, Holm FS, Armbruster K, Sivapalan P, Mosbech C, Ali AKM, Seersholm N, Wilcke JT, Brøndum E, Sonne TP, Rønholt F, Andreassen HF, Ulrik CS, Vestbo J, Jensen JS. Eosinophil-guided corticosteroid therapy in patients admitted to hospital with COPD exacerbation (CORTICO-COP): a multicentre, randomised, controlled, open-label, non-inferiority trial. *Lancet Respir Med*. 2019 Aug;7(8):699-709

Los dos estudios aleatorizaron los pacientes a una estrategia de tratamiento guiada por la determinación de eosinófilos en sangre. En el primer estudio el grupo de tratamiento guiado recibió 30mg de prednisolona oral o placebo según el resultado de los eosinófilos en sangre (más del 2% o igual o menor al 2%). El grupo de tratamiento estándar recibió 30mg de prednisolona independientemente de los resultados. Todos los pacientes recibieron además tratamiento con antibióticos de amplio espectro (Bafadhel 2012).

En el segundo estudio evaluó una estrategia de reducción del tratamiento con ~~corticosteroides~~ corticosteroides de modo que todos los pacientes recibieron 80 mg de metilprednisolona IV, durante los 4 siguientes días el grupo de tratamiento guiado sólo recibió 37,5 mg de prednisolona oral los días con una determinación de eosinófilos  $>3 \times 10^9/L$ . El grupo estándar recibió prednisolona oral los 4 días siguientes, independientemente de los resultados de eosinófilos en sangre (Sivapalan 2019).

**Tratamiento con antibióticos guiado por eosinófilos vs tratamiento estándar****Fracaso terapéutico**

En el análisis conjunto de los datos (2 ECAs, 427 pacientes) no mostró diferencias significativas respecto al fracaso terapéutico entre la estrategia guiada por la determinación de eosinófilos en sangre o el criterio habitual (RR 0.73; IC95% 0.30 a 1.80; 97 eventos).

La confianza con los resultados es baja (ver tabla de resumen de resultados).

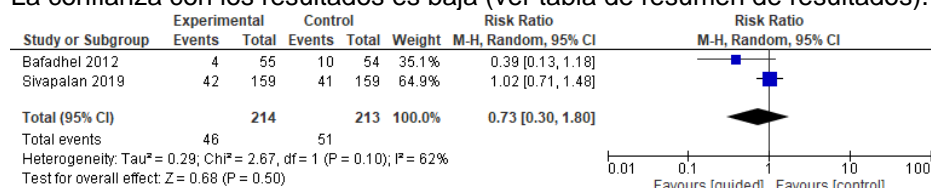

**Calidad  
baja**

| <b>Mortalidad por cualquier causa</b>                                                                                                                                                                                                                                                                                                                                                                                                                                                                                                                                                                                                                                                                            |                     |                    |                |               |        |                               | <b>Calidad baja</b> |                     |                    |                |               |        |                               |                |    |     |    |     |        |                   |                |  |     |  |     |        |                   |              |    |  |    |  |  |  |                               |  |  |  |  |  |  |                                              |  |  |  |  |  |  |
|------------------------------------------------------------------------------------------------------------------------------------------------------------------------------------------------------------------------------------------------------------------------------------------------------------------------------------------------------------------------------------------------------------------------------------------------------------------------------------------------------------------------------------------------------------------------------------------------------------------------------------------------------------------------------------------------------------------|---------------------|--------------------|----------------|---------------|--------|-------------------------------|---------------------|---------------------|--------------------|----------------|---------------|--------|-------------------------------|----------------|----|-----|----|-----|--------|-------------------|----------------|--|-----|--|-----|--------|-------------------|--------------|----|--|----|--|--|--|-------------------------------|--|--|--|--|--|--|----------------------------------------------|--|--|--|--|--|--|
| Un ECA (318 pacientes) no muestra una diferencia significativa en la mortalidad entre las dos estrategias (RR 1.50; IC95% 0.55 a 4.12; 15 eventos).                                                                                                                                                                                                                                                                                                                                                                                                                                                                                                                                                              |                     |                    |                |               |        |                               |                     |                     |                    |                |               |        |                               |                |    |     |    |     |        |                   |                |  |     |  |     |        |                   |              |    |  |    |  |  |  |                               |  |  |  |  |  |  |                                              |  |  |  |  |  |  |
| La confianza con los resultados es baja (ver tabla de resumen de resultados).                                                                                                                                                                                                                                                                                                                                                                                                                                                                                                                                                                                                                                    |                     |                    |                |               |        |                               |                     |                     |                    |                |               |        |                               |                |    |     |    |     |        |                   |                |  |     |  |     |        |                   |              |    |  |    |  |  |  |                               |  |  |  |  |  |  |                                              |  |  |  |  |  |  |
| <table><thead><tr><th>Study or Subgroup</th><th>Experimental Events</th><th>Experimental Total</th><th>Control Events</th><th>Control Total</th><th>Weight</th><th>Risk Ratio M-H, Fixed, 95% CI</th></tr></thead><tbody><tr><td>Sivapalan 2019</td><td>9</td><td>159</td><td>6</td><td>159</td><td>100.0%</td><td>1.50 [0.55, 4.12]</td></tr><tr><td>Total (95% CI)</td><td></td><td>159</td><td></td><td>159</td><td>100.0%</td><td>1.50 [0.55, 4.12]</td></tr><tr><td>Total events</td><td>9</td><td></td><td>6</td><td></td><td></td><td></td></tr><tr><td colspan="7">Heterogeneity: Not applicable</td></tr><tr><td colspan="7">Test for overall effect: Z = 0.79 (P = 0.43)</td></tr></tbody></table>     |                     |                    |                |               |        |                               | Study or Subgroup   | Experimental Events | Experimental Total | Control Events | Control Total | Weight | Risk Ratio M-H, Fixed, 95% CI | Sivapalan 2019 | 9  | 159 | 6  | 159 | 100.0% | 1.50 [0.55, 4.12] | Total (95% CI) |  | 159 |  | 159 | 100.0% | 1.50 [0.55, 4.12] | Total events | 9  |  | 6  |  |  |  | Heterogeneity: Not applicable |  |  |  |  |  |  | Test for overall effect: Z = 0.79 (P = 0.43) |  |  |  |  |  |  |
| Study or Subgroup                                                                                                                                                                                                                                                                                                                                                                                                                                                                                                                                                                                                                                                                                                | Experimental Events | Experimental Total | Control Events | Control Total | Weight | Risk Ratio M-H, Fixed, 95% CI |                     |                     |                    |                |               |        |                               |                |    |     |    |     |        |                   |                |  |     |  |     |        |                   |              |    |  |    |  |  |  |                               |  |  |  |  |  |  |                                              |  |  |  |  |  |  |
| Sivapalan 2019                                                                                                                                                                                                                                                                                                                                                                                                                                                                                                                                                                                                                                                                                                   | 9                   | 159                | 6              | 159           | 100.0% | 1.50 [0.55, 4.12]             |                     |                     |                    |                |               |        |                               |                |    |     |    |     |        |                   |                |  |     |  |     |        |                   |              |    |  |    |  |  |  |                               |  |  |  |  |  |  |                                              |  |  |  |  |  |  |
| Total (95% CI)                                                                                                                                                                                                                                                                                                                                                                                                                                                                                                                                                                                                                                                                                                   |                     | 159                |                | 159           | 100.0% | 1.50 [0.55, 4.12]             |                     |                     |                    |                |               |        |                               |                |    |     |    |     |        |                   |                |  |     |  |     |        |                   |              |    |  |    |  |  |  |                               |  |  |  |  |  |  |                                              |  |  |  |  |  |  |
| Total events                                                                                                                                                                                                                                                                                                                                                                                                                                                                                                                                                                                                                                                                                                     | 9                   |                    | 6              |               |        |                               |                     |                     |                    |                |               |        |                               |                |    |     |    |     |        |                   |                |  |     |  |     |        |                   |              |    |  |    |  |  |  |                               |  |  |  |  |  |  |                                              |  |  |  |  |  |  |
| Heterogeneity: Not applicable                                                                                                                                                                                                                                                                                                                                                                                                                                                                                                                                                                                                                                                                                    |                     |                    |                |               |        |                               |                     |                     |                    |                |               |        |                               |                |    |     |    |     |        |                   |                |  |     |  |     |        |                   |              |    |  |    |  |  |  |                               |  |  |  |  |  |  |                                              |  |  |  |  |  |  |
| Test for overall effect: Z = 0.79 (P = 0.43)                                                                                                                                                                                                                                                                                                                                                                                                                                                                                                                                                                                                                                                                     |                     |                    |                |               |        |                               |                     |                     |                    |                |               |        |                               |                |    |     |    |     |        |                   |                |  |     |  |     |        |                   |              |    |  |    |  |  |  |                               |  |  |  |  |  |  |                                              |  |  |  |  |  |  |
| <b>Reingreso por EPOC agudizado o muerte (día 30)</b>                                                                                                                                                                                                                                                                                                                                                                                                                                                                                                                                                                                                                                                            |                     |                    |                |               |        |                               | <b>Calidad baja</b> |                     |                    |                |               |        |                               |                |    |     |    |     |        |                   |                |  |     |  |     |        |                   |              |    |  |    |  |  |  |                               |  |  |  |  |  |  |                                              |  |  |  |  |  |  |
| Un ECA (318 pacientes) no muestra una diferencia significativa en un desenlace combinado de re-hospitalización por EPOC y muerte a los 30 días de seguimiento (RR 1.44; IC95% 0.93 a 2.24; 56 eventos).                                                                                                                                                                                                                                                                                                                                                                                                                                                                                                          |                     |                    |                |               |        |                               |                     |                     |                    |                |               |        |                               |                |    |     |    |     |        |                   |                |  |     |  |     |        |                   |              |    |  |    |  |  |  |                               |  |  |  |  |  |  |                                              |  |  |  |  |  |  |
| La confianza con los resultados es baja (ver tabla de resumen de resultados).                                                                                                                                                                                                                                                                                                                                                                                                                                                                                                                                                                                                                                    |                     |                    |                |               |        |                               |                     |                     |                    |                |               |        |                               |                |    |     |    |     |        |                   |                |  |     |  |     |        |                   |              |    |  |    |  |  |  |                               |  |  |  |  |  |  |                                              |  |  |  |  |  |  |
| <table><thead><tr><th>Study or Subgroup</th><th>Experimental Events</th><th>Experimental Total</th><th>Control Events</th><th>Control Total</th><th>Weight</th><th>Risk Ratio M-H, Fixed, 95% CI</th></tr></thead><tbody><tr><td>Sivapalan 2019</td><td>39</td><td>159</td><td>27</td><td>159</td><td>100.0%</td><td>1.44 [0.93, 2.24]</td></tr><tr><td>Total (95% CI)</td><td></td><td>159</td><td></td><td>159</td><td>100.0%</td><td>1.44 [0.93, 2.24]</td></tr><tr><td>Total events</td><td>39</td><td></td><td>27</td><td></td><td></td><td></td></tr><tr><td colspan="7">Heterogeneity: Not applicable</td></tr><tr><td colspan="7">Test for overall effect: Z = 1.64 (P = 0.10)</td></tr></tbody></table> |                     |                    |                |               |        |                               | Study or Subgroup   | Experimental Events | Experimental Total | Control Events | Control Total | Weight | Risk Ratio M-H, Fixed, 95% CI | Sivapalan 2019 | 39 | 159 | 27 | 159 | 100.0% | 1.44 [0.93, 2.24] | Total (95% CI) |  | 159 |  | 159 | 100.0% | 1.44 [0.93, 2.24] | Total events | 39 |  | 27 |  |  |  | Heterogeneity: Not applicable |  |  |  |  |  |  | Test for overall effect: Z = 1.64 (P = 0.10) |  |  |  |  |  |  |
| Study or Subgroup                                                                                                                                                                                                                                                                                                                                                                                                                                                                                                                                                                                                                                                                                                | Experimental Events | Experimental Total | Control Events | Control Total | Weight | Risk Ratio M-H, Fixed, 95% CI |                     |                     |                    |                |               |        |                               |                |    |     |    |     |        |                   |                |  |     |  |     |        |                   |              |    |  |    |  |  |  |                               |  |  |  |  |  |  |                                              |  |  |  |  |  |  |
| Sivapalan 2019                                                                                                                                                                                                                                                                                                                                                                                                                                                                                                                                                                                                                                                                                                   | 39                  | 159                | 27             | 159           | 100.0% | 1.44 [0.93, 2.24]             |                     |                     |                    |                |               |        |                               |                |    |     |    |     |        |                   |                |  |     |  |     |        |                   |              |    |  |    |  |  |  |                               |  |  |  |  |  |  |                                              |  |  |  |  |  |  |
| Total (95% CI)                                                                                                                                                                                                                                                                                                                                                                                                                                                                                                                                                                                                                                                                                                   |                     | 159                |                | 159           | 100.0% | 1.44 [0.93, 2.24]             |                     |                     |                    |                |               |        |                               |                |    |     |    |     |        |                   |                |  |     |  |     |        |                   |              |    |  |    |  |  |  |                               |  |  |  |  |  |  |                                              |  |  |  |  |  |  |
| Total events                                                                                                                                                                                                                                                                                                                                                                                                                                                                                                                                                                                                                                                                                                     | 39                  |                    | 27             |               |        |                               |                     |                     |                    |                |               |        |                               |                |    |     |    |     |        |                   |                |  |     |  |     |        |                   |              |    |  |    |  |  |  |                               |  |  |  |  |  |  |                                              |  |  |  |  |  |  |
| Heterogeneity: Not applicable                                                                                                                                                                                                                                                                                                                                                                                                                                                                                                                                                                                                                                                                                    |                     |                    |                |               |        |                               |                     |                     |                    |                |               |        |                               |                |    |     |    |     |        |                   |                |  |     |  |     |        |                   |              |    |  |    |  |  |  |                               |  |  |  |  |  |  |                                              |  |  |  |  |  |  |
| Test for overall effect: Z = 1.64 (P = 0.10)                                                                                                                                                                                                                                                                                                                                                                                                                                                                                                                                                                                                                                                                     |                     |                    |                |               |        |                               |                     |                     |                    |                |               |        |                               |                |    |     |    |     |        |                   |                |  |     |  |     |        |                   |              |    |  |    |  |  |  |                               |  |  |  |  |  |  |                                              |  |  |  |  |  |  |
| <b>Pacientes con infecciones que requirieron tratamiento con antibióticos (día 90)</b>                                                                                                                                                                                                                                                                                                                                                                                                                                                                                                                                                                                                                           |                     |                    |                |               |        |                               | <b>Calidad baja</b> |                     |                    |                |               |        |                               |                |    |     |    |     |        |                   |                |  |     |  |     |        |                   |              |    |  |    |  |  |  |                               |  |  |  |  |  |  |                                              |  |  |  |  |  |  |
| Un ECA (318 pacientes) no muestra una diferencia significativa en el número de pacientes con infecciones que requirieron tratamiento con antibióticos a los 30 días de seguimiento (RR 0.81; IC95% 0.61 a 1.07; 123 eventos).                                                                                                                                                                                                                                                                                                                                                                                                                                                                                    |                     |                    |                |               |        |                               |                     |                     |                    |                |               |        |                               |                |    |     |    |     |        |                   |                |  |     |  |     |        |                   |              |    |  |    |  |  |  |                               |  |  |  |  |  |  |                                              |  |  |  |  |  |  |
| La confianza con los resultados es baja (ver tabla de resumen de resultados).                                                                                                                                                                                                                                                                                                                                                                                                                                                                                                                                                                                                                                    |                     |                    |                |               |        |                               |                     |                     |                    |                |               |        |                               |                |    |     |    |     |        |                   |                |  |     |  |     |        |                   |              |    |  |    |  |  |  |                               |  |  |  |  |  |  |                                              |  |  |  |  |  |  |
| <table><thead><tr><th>Study or Subgroup</th><th>Experimental Events</th><th>Experimental Total</th><th>Control Events</th><th>Control Total</th><th>Weight</th><th>Risk Ratio M-H, Fixed, 95% CI</th></tr></thead><tbody><tr><td>Sivapalan 2019</td><td>55</td><td>159</td><td>68</td><td>159</td><td>100.0%</td><td>0.81 [0.61, 1.07]</td></tr><tr><td>Total (95% CI)</td><td></td><td>159</td><td></td><td>159</td><td>100.0%</td><td>0.81 [0.61, 1.07]</td></tr><tr><td>Total events</td><td>55</td><td></td><td>68</td><td></td><td></td><td></td></tr><tr><td colspan="7">Heterogeneity: Not applicable</td></tr><tr><td colspan="7">Test for overall effect: Z = 1.49 (P = 0.14)</td></tr></tbody></table> |                     |                    |                |               |        |                               | Study or Subgroup   | Experimental Events | Experimental Total | Control Events | Control Total | Weight | Risk Ratio M-H, Fixed, 95% CI | Sivapalan 2019 | 55 | 159 | 68 | 159 | 100.0% | 0.81 [0.61, 1.07] | Total (95% CI) |  | 159 |  | 159 | 100.0% | 0.81 [0.61, 1.07] | Total events | 55 |  | 68 |  |  |  | Heterogeneity: Not applicable |  |  |  |  |  |  | Test for overall effect: Z = 1.49 (P = 0.14) |  |  |  |  |  |  |
| Study or Subgroup                                                                                                                                                                                                                                                                                                                                                                                                                                                                                                                                                                                                                                                                                                | Experimental Events | Experimental Total | Control Events | Control Total | Weight | Risk Ratio M-H, Fixed, 95% CI |                     |                     |                    |                |               |        |                               |                |    |     |    |     |        |                   |                |  |     |  |     |        |                   |              |    |  |    |  |  |  |                               |  |  |  |  |  |  |                                              |  |  |  |  |  |  |
| Sivapalan 2019                                                                                                                                                                                                                                                                                                                                                                                                                                                                                                                                                                                                                                                                                                   | 55                  | 159                | 68             | 159           | 100.0% | 0.81 [0.61, 1.07]             |                     |                     |                    |                |               |        |                               |                |    |     |    |     |        |                   |                |  |     |  |     |        |                   |              |    |  |    |  |  |  |                               |  |  |  |  |  |  |                                              |  |  |  |  |  |  |
| Total (95% CI)                                                                                                                                                                                                                                                                                                                                                                                                                                                                                                                                                                                                                                                                                                   |                     | 159                |                | 159           | 100.0% | 0.81 [0.61, 1.07]             |                     |                     |                    |                |               |        |                               |                |    |     |    |     |        |                   |                |  |     |  |     |        |                   |              |    |  |    |  |  |  |                               |  |  |  |  |  |  |                                              |  |  |  |  |  |  |
| Total events                                                                                                                                                                                                                                                                                                                                                                                                                                                                                                                                                                                                                                                                                                     | 55                  |                    | 68             |               |        |                               |                     |                     |                    |                |               |        |                               |                |    |     |    |     |        |                   |                |  |     |  |     |        |                   |              |    |  |    |  |  |  |                               |  |  |  |  |  |  |                                              |  |  |  |  |  |  |
| Heterogeneity: Not applicable                                                                                                                                                                                                                                                                                                                                                                                                                                                                                                                                                                                                                                                                                    |                     |                    |                |               |        |                               |                     |                     |                    |                |               |        |                               |                |    |     |    |     |        |                   |                |  |     |  |     |        |                   |              |    |  |    |  |  |  |                               |  |  |  |  |  |  |                                              |  |  |  |  |  |  |
| Test for overall effect: Z = 1.49 (P = 0.14)                                                                                                                                                                                                                                                                                                                                                                                                                                                                                                                                                                                                                                                                     |                     |                    |                |               |        |                               |                     |                     |                    |                |               |        |                               |                |    |     |    |     |        |                   |                |  |     |  |     |        |                   |              |    |  |    |  |  |  |                               |  |  |  |  |  |  |                                              |  |  |  |  |  |  |
| <b>Diagnóstico de diabetes</b>                                                                                                                                                                                                                                                                                                                                                                                                                                                                                                                                                                                                                                                                                   |                     |                    |                |               |        |                               | <b>Calidad baja</b> |                     |                    |                |               |        |                               |                |    |     |    |     |        |                   |                |  |     |  |     |        |                   |              |    |  |    |  |  |  |                               |  |  |  |  |  |  |                                              |  |  |  |  |  |  |
| Un ECA (318 pacientes) no muestra una diferencia significativa en el número de pacientes con un nuevo diagnóstico de diabetes entre las dos estrategias (RR 1.07; IC95% 0.35 a 3.23; 12 eventos).                                                                                                                                                                                                                                                                                                                                                                                                                                                                                                                |                     |                    |                |               |        |                               |                     |                     |                    |                |               |        |                               |                |    |     |    |     |        |                   |                |  |     |  |     |        |                   |              |    |  |    |  |  |  |                               |  |  |  |  |  |  |                                              |  |  |  |  |  |  |
| La confianza con los resultados es baja (ver tabla de resumen de resultados).                                                                                                                                                                                                                                                                                                                                                                                                                                                                                                                                                                                                                                    |                     |                    |                |               |        |                               |                     |                     |                    |                |               |        |                               |                |    |     |    |     |        |                   |                |  |     |  |     |        |                   |              |    |  |    |  |  |  |                               |  |  |  |  |  |  |                                              |  |  |  |  |  |  |
| <table><thead><tr><th>Study or Subgroup</th><th>Experimental Events</th><th>Experimental Total</th><th>Control Events</th><th>Control Total</th><th>Weight</th><th>Risk Ratio M-H, Fixed, 95% CI</th></tr></thead><tbody><tr><td>Sivapalan 2019</td><td>6</td><td>135</td><td>6</td><td>144</td><td>100.0%</td><td>1.07 [0.35, 3.23]</td></tr><tr><td>Total (95% CI)</td><td></td><td>135</td><td></td><td>144</td><td>100.0%</td><td>1.07 [0.35, 3.23]</td></tr><tr><td>Total events</td><td>6</td><td></td><td>6</td><td></td><td></td><td></td></tr><tr><td colspan="7">Heterogeneity: Not applicable</td></tr><tr><td colspan="7">Test for overall effect: Z = 0.11 (P = 0.91)</td></tr></tbody></table>     |                     |                    |                |               |        |                               | Study or Subgroup   | Experimental Events | Experimental Total | Control Events | Control Total | Weight | Risk Ratio M-H, Fixed, 95% CI | Sivapalan 2019 | 6  | 135 | 6  | 144 | 100.0% | 1.07 [0.35, 3.23] | Total (95% CI) |  | 135 |  | 144 | 100.0% | 1.07 [0.35, 3.23] | Total events | 6  |  | 6  |  |  |  | Heterogeneity: Not applicable |  |  |  |  |  |  | Test for overall effect: Z = 0.11 (P = 0.91) |  |  |  |  |  |  |
| Study or Subgroup                                                                                                                                                                                                                                                                                                                                                                                                                                                                                                                                                                                                                                                                                                | Experimental Events | Experimental Total | Control Events | Control Total | Weight | Risk Ratio M-H, Fixed, 95% CI |                     |                     |                    |                |               |        |                               |                |    |     |    |     |        |                   |                |  |     |  |     |        |                   |              |    |  |    |  |  |  |                               |  |  |  |  |  |  |                                              |  |  |  |  |  |  |
| Sivapalan 2019                                                                                                                                                                                                                                                                                                                                                                                                                                                                                                                                                                                                                                                                                                   | 6                   | 135                | 6              | 144           | 100.0% | 1.07 [0.35, 3.23]             |                     |                     |                    |                |               |        |                               |                |    |     |    |     |        |                   |                |  |     |  |     |        |                   |              |    |  |    |  |  |  |                               |  |  |  |  |  |  |                                              |  |  |  |  |  |  |
| Total (95% CI)                                                                                                                                                                                                                                                                                                                                                                                                                                                                                                                                                                                                                                                                                                   |                     | 135                |                | 144           | 100.0% | 1.07 [0.35, 3.23]             |                     |                     |                    |                |               |        |                               |                |    |     |    |     |        |                   |                |  |     |  |     |        |                   |              |    |  |    |  |  |  |                               |  |  |  |  |  |  |                                              |  |  |  |  |  |  |
| Total events                                                                                                                                                                                                                                                                                                                                                                                                                                                                                                                                                                                                                                                                                                     | 6                   |                    | 6              |               |        |                               |                     |                     |                    |                |               |        |                               |                |    |     |    |     |        |                   |                |  |     |  |     |        |                   |              |    |  |    |  |  |  |                               |  |  |  |  |  |  |                                              |  |  |  |  |  |  |
| Heterogeneity: Not applicable                                                                                                                                                                                                                                                                                                                                                                                                                                                                                                                                                                                                                                                                                    |                     |                    |                |               |        |                               |                     |                     |                    |                |               |        |                               |                |    |     |    |     |        |                   |                |  |     |  |     |        |                   |              |    |  |    |  |  |  |                               |  |  |  |  |  |  |                                              |  |  |  |  |  |  |
| Test for overall effect: Z = 0.11 (P = 0.91)                                                                                                                                                                                                                                                                                                                                                                                                                                                                                                                                                                                                                                                                     |                     |                    |                |               |        |                               |                     |                     |                    |                |               |        |                               |                |    |     |    |     |        |                   |                |  |     |  |     |        |                   |              |    |  |    |  |  |  |                               |  |  |  |  |  |  |                                              |  |  |  |  |  |  |
| <b>Empeoramiento del control de la diabetes</b>                                                                                                                                                                                                                                                                                                                                                                                                                                                                                                                                                                                                                                                                  |                     |                    |                |               |        |                               | <b>Calidad baja</b> |                     |                    |                |               |        |                               |                |    |     |    |     |        |                   |                |  |     |  |     |        |                   |              |    |  |    |  |  |  |                               |  |  |  |  |  |  |                                              |  |  |  |  |  |  |
| En un ECA (318 pacientes) la estrategia guiada por la determinación de eosinófilos en sangre muestra una reducción significativa en el número de pacientes con empeoramiento del control de la diabetes existente (RR 0.13; IC95% 0.03 a 0.49; 12 eventos)                                                                                                                                                                                                                                                                                                                                                                                                                                                       |                     |                    |                |               |        |                               |                     |                     |                    |                |               |        |                               |                |    |     |    |     |        |                   |                |  |     |  |     |        |                   |              |    |  |    |  |  |  |                               |  |  |  |  |  |  |                                              |  |  |  |  |  |  |

| La confianza con los resultados es baja (ver tabla de resumen de resultados).                                                                                                                                                                                                                                                                                                                                                                                                                                                                                                                                                                                                                                                   |                        |                       |                   |                                      |        |                                  |                   |                        |                       |                   |                                      |               |                                  |                |        |                    |                |    |        |                   |                    |                               |    |  |    |        |                                              |              |   |  |    |  |  |  |                               |  |  |  |  |  |  |                                               |  |  |  |  |  |  |  |
|---------------------------------------------------------------------------------------------------------------------------------------------------------------------------------------------------------------------------------------------------------------------------------------------------------------------------------------------------------------------------------------------------------------------------------------------------------------------------------------------------------------------------------------------------------------------------------------------------------------------------------------------------------------------------------------------------------------------------------|------------------------|-----------------------|-------------------|--------------------------------------|--------|----------------------------------|-------------------|------------------------|-----------------------|-------------------|--------------------------------------|---------------|----------------------------------|----------------|--------|--------------------|----------------|----|--------|-------------------|--------------------|-------------------------------|----|--|----|--------|----------------------------------------------|--------------|---|--|----|--|--|--|-------------------------------|--|--|--|--|--|--|-----------------------------------------------|--|--|--|--|--|--|--|
| <table><thead><tr><th>Study or Subgroup</th><th>Experimental<br/>Events</th><th>Experimental<br/>Total</th><th>Control<br/>Events</th><th>Control<br/>Total</th><th>Weight</th><th>Risk Ratio<br/>M-H, Fixed, 95% CI</th></tr></thead><tbody><tr><td>Sivapalan 2019</td><td>2</td><td>24</td><td>10</td><td>15</td><td>100.0%</td><td>0.13 [0.03, 0.49]</td></tr><tr><td>Total (95% CI)</td><td></td><td>24</td><td></td><td>15</td><td>100.0%</td><td>0.13 [0.03, 0.49]</td></tr><tr><td>Total events</td><td>2</td><td></td><td>10</td><td></td><td></td><td></td></tr><tr><td colspan="7">Heterogeneity: Not applicable</td></tr><tr><td colspan="7">Test for overall effect: Z = 2.97 (P = 0.003)</td></tr></tbody></table> |                        |                       |                   |                                      |        |                                  | Study or Subgroup | Experimental<br>Events | Experimental<br>Total | Control<br>Events | Control<br>Total                     | Weight        | Risk Ratio<br>M-H, Fixed, 95% CI | Sivapalan 2019 | 2      | 24                 | 10             | 15 | 100.0% | 0.13 [0.03, 0.49] | Total (95% CI)     |                               | 24 |  | 15 | 100.0% | 0.13 [0.03, 0.49]                            | Total events | 2 |  | 10 |  |  |  | Heterogeneity: Not applicable |  |  |  |  |  |  | Test for overall effect: Z = 2.97 (P = 0.003) |  |  |  |  |  |  |  |
| Study or Subgroup                                                                                                                                                                                                                                                                                                                                                                                                                                                                                                                                                                                                                                                                                                               | Experimental<br>Events | Experimental<br>Total | Control<br>Events | Control<br>Total                     | Weight | Risk Ratio<br>M-H, Fixed, 95% CI |                   |                        |                       |                   |                                      |               |                                  |                |        |                    |                |    |        |                   |                    |                               |    |  |    |        |                                              |              |   |  |    |  |  |  |                               |  |  |  |  |  |  |                                               |  |  |  |  |  |  |  |
| Sivapalan 2019                                                                                                                                                                                                                                                                                                                                                                                                                                                                                                                                                                                                                                                                                                                  | 2                      | 24                    | 10                | 15                                   | 100.0% | 0.13 [0.03, 0.49]                |                   |                        |                       |                   |                                      |               |                                  |                |        |                    |                |    |        |                   |                    |                               |    |  |    |        |                                              |              |   |  |    |  |  |  |                               |  |  |  |  |  |  |                                               |  |  |  |  |  |  |  |
| Total (95% CI)                                                                                                                                                                                                                                                                                                                                                                                                                                                                                                                                                                                                                                                                                                                  |                        | 24                    |                   | 15                                   | 100.0% | 0.13 [0.03, 0.49]                |                   |                        |                       |                   |                                      |               |                                  |                |        |                    |                |    |        |                   |                    |                               |    |  |    |        |                                              |              |   |  |    |  |  |  |                               |  |  |  |  |  |  |                                               |  |  |  |  |  |  |  |
| Total events                                                                                                                                                                                                                                                                                                                                                                                                                                                                                                                                                                                                                                                                                                                    | 2                      |                       | 10                |                                      |        |                                  |                   |                        |                       |                   |                                      |               |                                  |                |        |                    |                |    |        |                   |                    |                               |    |  |    |        |                                              |              |   |  |    |  |  |  |                               |  |  |  |  |  |  |                                               |  |  |  |  |  |  |  |
| Heterogeneity: Not applicable                                                                                                                                                                                                                                                                                                                                                                                                                                                                                                                                                                                                                                                                                                   |                        |                       |                   |                                      |        |                                  |                   |                        |                       |                   |                                      |               |                                  |                |        |                    |                |    |        |                   |                    |                               |    |  |    |        |                                              |              |   |  |    |  |  |  |                               |  |  |  |  |  |  |                                               |  |  |  |  |  |  |  |
| Test for overall effect: Z = 2.97 (P = 0.003)                                                                                                                                                                                                                                                                                                                                                                                                                                                                                                                                                                                                                                                                                   |                        |                       |                   |                                      |        |                                  |                   |                        |                       |                   |                                      |               |                                  |                |        |                    |                |    |        |                   |                    |                               |    |  |    |        |                                              |              |   |  |    |  |  |  |                               |  |  |  |  |  |  |                                               |  |  |  |  |  |  |  |
| <b>Chronic Respiratory Disease Questionnaire (CRQ)</b>                                                                                                                                                                                                                                                                                                                                                                                                                                                                                                                                                                                                                                                                          |                        |                       |                   |                                      |        |                                  |                   |                        |                       |                   |                                      |               |                                  |                |        |                    |                |    |        |                   |                    |                               |    |  |    |        |                                              |              |   |  |    |  |  |  |                               |  |  |  |  |  |  |                                               |  |  |  |  |  |  |  |
| Un ECA (109 pacientes) no muestra una reducción significativa entre las dos estrategias en el estado salud medido con el cuestionario CRQ (Chronic Respiratory Disease Questionnaire) MD 0.3 puntos más; IC95% 0 a 0.6 puntos más).                                                                                                                                                                                                                                                                                                                                                                                                                                                                                             |                        |                       |                   |                                      |        |                                  | Calidad moderada  |                        |                       |                   |                                      |               |                                  |                |        |                    |                |    |        |                   |                    |                               |    |  |    |        |                                              |              |   |  |    |  |  |  |                               |  |  |  |  |  |  |                                               |  |  |  |  |  |  |  |
| La confianza con los resultados es moderada (ver tabla de resumen de resultados).                                                                                                                                                                                                                                                                                                                                                                                                                                                                                                                                                                                                                                               |                        |                       |                   |                                      |        |                                  |                   |                        |                       |                   |                                      |               |                                  |                |        |                    |                |    |        |                   |                    |                               |    |  |    |        |                                              |              |   |  |    |  |  |  |                               |  |  |  |  |  |  |                                               |  |  |  |  |  |  |  |
| <table><thead><tr><th>Study or Subgroup</th><th>Mean Difference</th><th>SE</th><th>Weight</th><th>Mean Difference<br/>IV, Fixed, 95% CI</th></tr></thead><tbody><tr><td>Bafadhel 2012</td><td>0.3</td><td>0.1531</td><td>100.0%</td><td>0.30 [-0.00, 0.60]</td></tr><tr><td>Total (95% CI)</td><td></td><td></td><td>100.0%</td><td>0.30 [-0.00, 0.60]</td></tr><tr><td colspan="5">Heterogeneity: Not applicable</td></tr><tr><td colspan="5">Test for overall effect: Z = 1.96 (P = 0.05)</td></tr></tbody></table>                                                                                                                                                                                                           |                        |                       |                   |                                      |        |                                  | Study or Subgroup | Mean Difference        | SE                    | Weight            | Mean Difference<br>IV, Fixed, 95% CI | Bafadhel 2012 | 0.3                              | 0.1531         | 100.0% | 0.30 [-0.00, 0.60] | Total (95% CI) |    |        | 100.0%            | 0.30 [-0.00, 0.60] | Heterogeneity: Not applicable |    |  |    |        | Test for overall effect: Z = 1.96 (P = 0.05) |              |   |  |    |  |  |  |                               |  |  |  |  |  |  |                                               |  |  |  |  |  |  |  |
| Study or Subgroup                                                                                                                                                                                                                                                                                                                                                                                                                                                                                                                                                                                                                                                                                                               | Mean Difference        | SE                    | Weight            | Mean Difference<br>IV, Fixed, 95% CI |        |                                  |                   |                        |                       |                   |                                      |               |                                  |                |        |                    |                |    |        |                   |                    |                               |    |  |    |        |                                              |              |   |  |    |  |  |  |                               |  |  |  |  |  |  |                                               |  |  |  |  |  |  |  |
| Bafadhel 2012                                                                                                                                                                                                                                                                                                                                                                                                                                                                                                                                                                                                                                                                                                                   | 0.3                    | 0.1531                | 100.0%            | 0.30 [-0.00, 0.60]                   |        |                                  |                   |                        |                       |                   |                                      |               |                                  |                |        |                    |                |    |        |                   |                    |                               |    |  |    |        |                                              |              |   |  |    |  |  |  |                               |  |  |  |  |  |  |                                               |  |  |  |  |  |  |  |
| Total (95% CI)                                                                                                                                                                                                                                                                                                                                                                                                                                                                                                                                                                                                                                                                                                                  |                        |                       | 100.0%            | 0.30 [-0.00, 0.60]                   |        |                                  |                   |                        |                       |                   |                                      |               |                                  |                |        |                    |                |    |        |                   |                    |                               |    |  |    |        |                                              |              |   |  |    |  |  |  |                               |  |  |  |  |  |  |                                               |  |  |  |  |  |  |  |
| Heterogeneity: Not applicable                                                                                                                                                                                                                                                                                                                                                                                                                                                                                                                                                                                                                                                                                                   |                        |                       |                   |                                      |        |                                  |                   |                        |                       |                   |                                      |               |                                  |                |        |                    |                |    |        |                   |                    |                               |    |  |    |        |                                              |              |   |  |    |  |  |  |                               |  |  |  |  |  |  |                                               |  |  |  |  |  |  |  |
| Test for overall effect: Z = 1.96 (P = 0.05)                                                                                                                                                                                                                                                                                                                                                                                                                                                                                                                                                                                                                                                                                    |                        |                       |                   |                                      |        |                                  |                   |                        |                       |                   |                                      |               |                                  |                |        |                    |                |    |        |                   |                    |                               |    |  |    |        |                                              |              |   |  |    |  |  |  |                               |  |  |  |  |  |  |                                               |  |  |  |  |  |  |  |
| <b>Balance entre beneficios y riesgos</b>                                                                                                                                                                                                                                                                                                                                                                                                                                                                                                                                                                                                                                                                                       |                        |                       |                   |                                      |        |                                  |                   |                        |                       |                   |                                      |               |                                  |                |        |                    |                |    |        |                   |                    |                               |    |  |    |        |                                              |              |   |  |    |  |  |  |                               |  |  |  |  |  |  |                                               |  |  |  |  |  |  |  |
| En general no se detectaron diferencias significativas entre las dos estrategias respecto al fracaso terapéutico, reingresos, mortalidad o estado de salud. Sin embargo, un estudio diseñado para reducir el uso de corticosteroides orales en aquellos pacientes con un valor bajo de eosinófilos en sangre mostró un mejor control de los pacientes con diabetes. Este estudio muestra que el grupo que siguió una estrategia guiada recibió una menor dosis de corticosteroides orales (en el seguimiento a 5, 30 y 90 días).                                                                                                                                                                                                |                        |                       |                   |                                      |        |                                  |                   |                        |                       |                   |                                      |               |                                  |                |        |                    |                |    |        |                   |                    |                               |    |  |    |        |                                              |              |   |  |    |  |  |  |                               |  |  |  |  |  |  |                                               |  |  |  |  |  |  |  |
| La determinación de eosinófilos en sangre como estrategia orientada a reducir el tratamiento con corticosteroides orales en los pacientes con agudizaciones de la EPOC consigue reducir la dosis total sin diferencias significativas en el control de la EPOC.                                                                                                                                                                                                                                                                                                                                                                                                                                                                 |                        |                       |                   |                                      |        |                                  |                   |                        |                       |                   |                                      |               |                                  |                |        |                    |                |    |        |                   |                    |                               |    |  |    |        |                                              |              |   |  |    |  |  |  |                               |  |  |  |  |  |  |                                               |  |  |  |  |  |  |  |
| <b>Calidad global de la evidencia</b>                                                                                                                                                                                                                                                                                                                                                                                                                                                                                                                                                                                                                                                                                           |                        |                       |                   |                                      |        |                                  |                   |                        |                       |                   |                                      |               |                                  |                |        |                    |                |    |        |                   |                    |                               |    |  |    |        |                                              |              |   |  |    |  |  |  |                               |  |  |  |  |  |  |                                               |  |  |  |  |  |  |  |
| La confianza global con los resultados fue baja principalmente debido a la variabilidad e imprecisión de los resultados.                                                                                                                                                                                                                                                                                                                                                                                                                                                                                                                                                                                                        |                        |                       |                   |                                      |        |                                  |                   |                        |                       |                   |                                      |               |                                  |                |        |                    |                |    |        |                   |                    |                               |    |  |    |        |                                              |              |   |  |    |  |  |  |                               |  |  |  |  |  |  |                                               |  |  |  |  |  |  |  |
| <b>Uso de recursos y costes</b>                                                                                                                                                                                                                                                                                                                                                                                                                                                                                                                                                                                                                                                                                                 |                        |                       |                   |                                      |        |                                  |                   |                        |                       |                   |                                      |               |                                  |                |        |                    |                |    |        |                   |                    |                               |    |  |    |        |                                              |              |   |  |    |  |  |  |                               |  |  |  |  |  |  |                                               |  |  |  |  |  |  |  |
| No se identificó ninguna referencia relevante para esta pregunta                                                                                                                                                                                                                                                                                                                                                                                                                                                                                                                                                                                                                                                                |                        |                       |                   |                                      |        |                                  |                   |                        |                       |                   |                                      |               |                                  |                |        |                    |                |    |        |                   |                    |                               |    |  |    |        |                                              |              |   |  |    |  |  |  |                               |  |  |  |  |  |  |                                               |  |  |  |  |  |  |  |
| <b>Recomendaciones</b>                                                                                                                                                                                                                                                                                                                                                                                                                                                                                                                                                                                                                                                                                                          |                        |                       |                   |                                      |        |                                  |                   |                        |                       |                   |                                      |               |                                  |                |        |                    |                |    |        |                   |                    |                               |    |  |    |        |                                              |              |   |  |    |  |  |  |                               |  |  |  |  |  |  |                                               |  |  |  |  |  |  |  |
| Se recomienda administrar el uso de corticoides orales en pacientes con recuento de eosinófilos ≥ 300 células/mm <sup>3</sup> (recomendación débil, calidad de evidencia baja).                                                                                                                                                                                                                                                                                                                                                                                                                                                                                                                                                 |                        |                       |                   |                                      |        |                                  |                   |                        |                       |                   |                                      |               |                                  |                |        |                    |                |    |        |                   |                    |                               |    |  |    |        |                                              |              |   |  |    |  |  |  |                               |  |  |  |  |  |  |                                               |  |  |  |  |  |  |  |
| <b>Especificaciones</b>                                                                                                                                                                                                                                                                                                                                                                                                                                                                                                                                                                                                                                                                                                         |                        |                       |                   |                                      |        |                                  |                   |                        |                       |                   |                                      |               |                                  |                |        |                    |                |    |        |                   |                    |                               |    |  |    |        |                                              |              |   |  |    |  |  |  |                               |  |  |  |  |  |  |                                               |  |  |  |  |  |  |  |
| La eficacia de los corticoides orales en las agudizaciones de la EPOC es mayor en pacientes con recuento de eosinófilos ≥ 300 células/mm <sup>3</sup>                                                                                                                                                                                                                                                                                                                                                                                                                                                                                                                                                                           |                        |                       |                   |                                      |        |                                  |                   |                        |                       |                   |                                      |               |                                  |                |        |                    |                |    |        |                   |                    |                               |    |  |    |        |                                              |              |   |  |    |  |  |  |                               |  |  |  |  |  |  |                                               |  |  |  |  |  |  |  |

Pregunta: ¿La determinación de los eosinófilos, es útil para guiar la administración de corticosteroides orales en los pacientes con una agudización de la EPOC?

| Certainty assessment                                                            |                    |                    |                          |                     |                        |                       | Nº de pacientes                           |                   | Efecto                |                                                | Certainty                                                                                      | Importancia |
|---------------------------------------------------------------------------------|--------------------|--------------------|--------------------------|---------------------|------------------------|-----------------------|-------------------------------------------|-------------------|-----------------------|------------------------------------------------|------------------------------------------------------------------------------------------------|-------------|
| Nº de estudios                                                                  | Diseño de estudio  | Riesgo de sesgo    | Inconsistencia           | Evidencia indirecta | Imprecisión            | Otras consideraciones | la determinación de eosinófilos en sangre | criterio habitual | Relativo (95% CI)     | Absoluto (95% CI)                              |                                                                                                |             |
| Fracaso terapéutico                                                             |                    |                    |                          |                     |                        |                       |                                           |                   |                       |                                                |                                                                                                |             |
| 2                                                                               | ensayos aleatorios | no es serio        | serio <sup>a</sup>       | no es serio         | serio <sup>b</sup>     | ninguno               | 46/214 (21.5%)                            | 51/213 (23.9%)    | RR 0.73 (0.30 a 1.80) | 50 más por 1000 (de 70 menos a 170 más )       |  BAJA       | CRÍTICO     |
| Mortalidad por cualquier causa                                                  |                    |                    |                          |                     |                        |                       |                                           |                   |                       |                                                |                                                                                                |             |
| 1                                                                               | ensayos aleatorios | no es serio        | no es serio <sup>c</sup> | no es serio         | muy serio <sup>e</sup> | ninguno               | 9/159 (5.7%)                              | 6/159 (3.8%)      | RR 1.50 (0.55 a 4.12) | 19 más por 1000 (de 17 menos a 118 más )       |  BAJA       | CRÍTICO     |
| Reingreso por EPOC agudizado o muerte (día 30)                                  |                    |                    |                          |                     |                        |                       |                                           |                   |                       |                                                |                                                                                                |             |
| 1                                                                               | ensayos aleatorios | no es serio        | no es serio <sup>c</sup> | serio <sup>d</sup>  | serio <sup>b</sup>     | ninguno               | 39/159 (24.5%)                            | 27/159 (17.0%)    | RR 1.44 (0.93 a 2.24) | 75 más por 1000 (de 12 menos a 211 más )       |  BAJA       | IMPORTANTE  |
| Pacientes con infecciones que requirieron tratamiento con antibióticos (día 90) |                    |                    |                          |                     |                        |                       |                                           |                   |                       |                                                |                                                                                                |             |
| 1                                                                               | ensayos aleatorios | serio <sup>f</sup> | no es serio <sup>c</sup> | no es serio         | serio <sup>b</sup>     | ninguno               | 55/159 (34.6%)                            | 68/159 (42.8%)    | RR 0.81 (0.61 a 1.07) | 81 menos por 1000 (de 167 menos a 30 más )     |  BAJA       | IMPORTANTE  |
| Diagnóstico de diabetes                                                         |                    |                    |                          |                     |                        |                       |                                           |                   |                       |                                                |                                                                                                |             |
| 1                                                                               | ensayos aleatorios | no es serio        | no es serio <sup>c</sup> | no es serio         | muy serio <sup>e</sup> | ninguno               | 6/135 (4.4%)                              | 6/144 (4.2%)      | RR 1.07 (0.35 a 3.23) | 3 más por 1000 (de 27 menos a 93 más )         |  BAJA     | IMPORTANTE  |
| Empeoramiento del control de la diabetes                                        |                    |                    |                          |                     |                        |                       |                                           |                   |                       |                                                |                                                                                                |             |
| 1                                                                               | ensayos aleatorios | no es serio        | no es serio <sup>c</sup> | no es serio         | muy serio <sup>e</sup> | ninguno               | 2/24 (8.3%)                               | 10/15 (66.7%)     | RR 0.13 (0.03 a 0.49) | 580 menos por 1000 (de 647 menos a 340 menos ) |  BAJA     | IMPORTANTE  |
| Chronic Respiratory Disease Questionnaire (CRQ)                                 |                    |                    |                          |                     |                        |                       |                                           |                   |                       |                                                |                                                                                                |             |
| 1                                                                               | ensayos aleatorios | no es serio        | no es serio <sup>c</sup> | no es serio         | serio <sup>g</sup>     | ninguno               | 55                                        | 54                | -                     | MD 0.3 más alto. (0 a 0.6 más alto.)           |  MODERADA | IMPORTANTE  |

CI: Intervalo de confianza RR: Razón de riesgo; MD: Diferencia media

## Explicaciones

- a. Variabilidad significativa en los resultados de los distintos estudios
- b. Numero escaso de eventos; límites del IC95% que apuntan a un efecto beneficioso o perjudicial
- c. Un solo estudio
- d. Desenlace combinado con una importancia relativa muy distinta
- e. Numero muy escaso de eventos
- f. Estudio con un diseño abierto, no se puede descartar la influencia en la valoración de desenlaces subjetivos
- g. El límite superior del IC95% supera el límite establecido como clinicamente relevante (0,5 puntos)
